# Supplementary material for: Deep-sequence phylogenetics to quantify patterns of HIV transmission in the context of a universal testing and treatment trial – BCPP/Ya Tsie trial
Source: eLife. 2022 Mar 1;11:e72657. doi: 10.7554/eLife.72657 (PMC8912920; doi:10.7554/eLife.72657)
Supplement: Supplementary file 1. [file elife-72657-supp1.xlsx]

## Sheet: Contents
Contents
Supplementary file 1 Table 1A:	Characteristics of the Botswana -Ya Tsie trial population living with HIV
Supplementary file 1 Table 1B:	A listing of command-line parameters used for deep-sequence phylogenetics with Phyloscanner and consensus sequence phylogenetics with HIV-TRACE and Cluster Picker
Supplementary file 1 Table 1C:	HIV-1 viral genotyping densities of communities in the Botswana Ya Tsie HIV trial
Supplementary file 1 Table 1D:	Summary of viral suppression among trial participants in clusters of genetically similar HIV-1 infections
Supplementary file 1 Table 1E:	Quantiles of age differences between males and females in inferred transmission pairs before and after adjustment for sampling variability
Supplementary file 1 Table 1F:	Observed and predicted proportions of HIV-1 transmissions in the trial population by age group
Supplementary file 1 Table 1G:	Observed and predicted proportions of HIV-1 transmissions in the trial population by gender and age group
Supplementary file 1 Table 1H:	Proportions of inferred HIV-1 transmissions among trial participants by gender
Supplementary file 1 Table 1I:	Observed and predicted proportions of HIV-1 transmissions in the trial population by community
Supplementary file 1 Table 1J:	Observed and predicted proportions of HIV-1 transmissions in the trial population by geographical region
Supplementary file 1 Table 1K:	Observed and predicted proportions of HIV-1 transmissions in the trial population by randomization-intervention condition
Supplementary file 1 Table 1L:	Observed and predicted proportions of HIV-1 transmissions in the trial population at baseline by randomization-intervention condition
Supplementary file 1 Table 1M:	Observed and predicted proportions of HIV-1 transmissions in the trial population after baseline by randomization-intervention condition
Supplementary file 1 Table 1N:	Observed and predicted proportions of HIV-1 transmissions in the trial population by randomization-intervention condition (including same-sex pairs)
Supplementary file 1 Table 1O:	Observed and predicted proportions of HIV-1 transmissions in the trial population by randomization-intervention condition (excluding same-sex pairs)

## Sheet: Supplementary file 1 Table 1A
Supplementary file 1 Table 1A. Characteristics of the Botswana -Ya Tsie trial population living with HIV
	Population size, 2011 Botswana census	Estimated number of people with HIV among trial communities	Enrolled in trial and provided a sample for deep-sequencing of their HIV viral genome	Met minimum criteria for phylogenetic analyses	On anti-retroviral therapy	Virally suppressed	Assigned to a genetic similarity cluster	Male-female pairs with strongly supported evidence for phylogenetic linkage and direction of transmission
Total	106712	27446	5114	3832	3335	3133	525	82
Women	59,201 (55.5%)	17,815 (64.9%)	3,639 (71.2%)	2,730 (71.2%)	2,407 (72.2%)	2,263 (72.2%)	366 (69.7%)	37 (45.1%)
Age
16-24 years	17,463 (16.4%)	1,285 (4.7%)	359 (7.0%)	262 (6.8%)	178 (5.3%)	153 (4.9%)	48 (9.1%)	4 (4.9%)
25-34 years	17,028 (16.0%)	4,730 (17.2%)	1,032 (20.2%)	740 (19.3%)	616 (18.5%)	577 (18.4%)	104 (19.8%)	12 (14.6%)
35-49 years	15,273 (14.3%)	8,494 (30.9%)	1,620 (31.7%)	1,238 (32.3%)	1,151 (34.5%)	1,090 (34.8%)	156 (29.7%)	16 (19.5%)
50-64 years	9,437 (8.8%)	3,306 (12.0%)	627 (12.3%)	490 (12.8%)	462 (13.9%)	443 (14.1%)	58 (11.0%)	5 (6.1%)
Men	47,511 (44.5%)	9,631 (35.1%)	1,475 (28.8%)	1,102 (28.8%)	928 (27.8%)	870 (27.8%)	159 (30.3%)	45 (54.9%)
Age
16-24 years	15,688 (14.7%)	812 (3.0%)	82 (1.6%)	56 (1.5%)	35 (1.0%)	28 (0.9%)	5 (0.9%)	0 (0.0%)
25-34 years	13,465 (12.6%)	2,618 (9.5%)	274 (5.3%)	206 (5.4%)	139 (4.2%)	129 (4.1%)	35 (6.7%)	11 (13.4%)
35-49 years	12,091 (11.3%)	4,675 (17.0%)	763 (14.9%)	560 (14.6%)	494 (14.8%)	469 (15.0%)	70 (13.3%)	21 (25.6%)
50-64 years	6,267 (5.9%)	1,526 (5.6%)	356 (7.0%)	280 (7.3%)	260 (7.8%)	244 (7.8%)	49 (9.3%)	13 (15.9%)
Notes
1. Population size estimates based on the proportion of individuals eligible to participate in the Botswana - Ya Tsie trial and gender-age proportion distributions in the 2011 Botswana census.
2. Estimates of the number of people with HIV were computed from empirical Bayes estimates of HIV prevalence at the start of the trial that were standardized to gender-age specific distributions in the 2011 Botswana census. See materials and methods.
3. Of the 5,114 deep-sequenced trial participants there was a single female with missing enrollment age information.
4. Participants whose consensus HIV-1 viral whole genome sequences were ≥ 6,300 nucleotides in length and had < 30% of bases missing beyond the first 1000 nucleotides were selected for phylogenetic analyses.
5. Viral suppression was defined as ≤ 400 copies per mL of plasma.
6. Custers of participants with genetically similar HIV-1 infections were phylogenetically inferred from consensus HIV-1 viral whole genome sequences using HIVTrace (genetic distance threshold: ≤ 4.5% substitutions per site) and cluster picker (genetic distance threshold: ≤ 4.5% substitutions per site; bootsrap support threshold: ≥ 80%).
7. Phylogenetic inference of direction of transmission within identified HIV-1 genetic similarity clusters was performed with deep-sequenced HIV-1 viral whole genomes using phyloscanner; pairs listed under women denote female-to-male transmission events and ones listed under men represent male-to-female transmission events.

## Sheet: Supplementary file 1 Table 1B
Supplementary file 1 Table 1B. A listing of command-line parameters used for deep-sequence phylogenetics with Phyloscanner and consensus sequence phylogenetics with HIV-TRACE and Cluster Picker
Phyloscanner procedure	Script or R function	Input parameters	Description	Value	Comments
Infer within and between host phylogenies in windows along the genome from mapped reads produced by next generation sequencing of the HIV-1 virus in multiple individuals.	phyloscanner_make_trees.py	BamAndRefList	A comma-separated-variable (csv) format file that lists for each of the individuals included in a single phyloscanner run a bam file containing mapped reads and a corresponding reference sequence file, in fasta-format, that was used to map the reads	csv file	Individuals with potentially closely related HIV-1 infections were assigned to genetic similarity clusters with the HIV-TRACE (n = 122) and cluster picker (n = 231) clustering algorithms (see methods). Phyloscanner was run on each cluster separately interrogating probable genetic linkage and direction of transmission between all possible pairs of individuals within a cluster. Altogether, 358 clus…
		--x-samtools	Samtools options	samtools	Phyloscanner default
		--x-mafft	Specifies mafft options to use when generating read alignments at windows defined by the user along the genome	mafft	Phyloscanner default
		--x-raxml	Specifies the RAxML executable and options to use when inferring phylogenies	"raxmlHPC-PTHREADS-SSE3 -m GTRCAT -T 8 -p 42"	Read alignments generated with phyloscanner were analyzed with jmodeltest2 to identify the best suited substitution model to use when inferring phylogenies. In total, 24 models were compared corresponding to: 3 substitution schemes (all substitution rates equal - simplest model, different rates of transitions and transversions - intermediate model, all substitution rates unequal - most complex mo…
		--alignment-of-other-refs	Background sequences. An alignment of HIV-1 reference sequences that will be included in the alignment of reads for comparison	hxb2_bw00_from_hiv1_com_2012_genome_dna.fasta	We used an alignment of 2 full-genome HIV-1 reference sequences comprising HXB2 and C.BW.00.00BW07621.AF443088 that was sourced from the 2012 compendium of the Los Alamos HIV sequence database. The samples in the study were subtype C therefore HXB2 was used both for setting default coordinates across the genome and for rooting each deep-sequence phylogeny.
		--pairwise-align-to	Sequence against which the mapping references used to create the input bam files will each be separately pairwise-aligned in order to map genome coordinates.	B.FR.83.HXB2_LAI_IIIB_BRU.K03455	Name of HXB2 in the alignment of background sequences
		--merge-paired-reads	For paired-read data, overlapping mates in a pair are merged into a single potentially longer read	Flag set	The dataset comprised paired-end next-generation sequencing reads produced with Illumina Miseq (read length: 250 or 300 base pairs) and HiSeq instruments (read length: 250 base pairs).
		--discard-improper-pairs	For paired-read data, reads flagged as improperly paired are discarded	Flag set
		--quality-trim-ends	A phred quality score threshold for excluding poor quality ends of reads. Each read is trimmmed inwards from the end until a base of the specified Phred score is met.	23
		--min-internal-quality	A phred quality score threshold for excluding reads with poor internal quality. Reads with two or more bases below the specified Phred score after end trimming are excluded.	23
		--merging-threshold-a	Reads that differ by a number of bases equal to or less than the set threshold are merged so that reads with higher counts absorb those with lower counts	1
		--min-read-count	The minimum number of times each unique read must be observed to be included in read alignments.	2	Unique reads that after merging were only observed once were excluded from further analyses
		--check-recombination	Computes a metric for triplet recombination, where for each possible set of three sequences, one is considered the potential recombinant of the other two.	Flag not set	No recombination checks were performed. Computationally expensive as computation time scales cubically with the number of unique reads each sample has per genomic window.
		--windows	A comma-separated series of paired coordinates specifying the start and end coordinates of genomic windows.	From 1,000 to 9,400 in 100 base pair increments of 200 base pair windows	Increments were set to be half the window width for tightly overlapping windows. All subjects in genetic similarity clusters were included in deep-sequence phylogenetic analyses.
		--num-bootstraps	Number of bootrap trees that should be computed for each read alignment.	None	Phyloscanner default. Maximum likelihood trees were computed with RAxML from overlapping read alignments in order to account for uncertainity in building trees, sequencing and construction of alignments.
		--keep-output-together	File management option that keeps output files in the same directory rather than creating sub-directories for different kinds of phyloscanner outputs.	Flag set	Option set for easier file managent.
Analyze phylogenies to infer transmission.	phyloscanner_analyse_trees.R	tree	A string specifying the prefix of all input trees. Alternatively the name of a directory containing all the input trees can be provided	RAxML_bestTree.InWindow_	A prefix for filenames of trees produced by the phyloscanner_make_trees.py script with RAxML was provided
		splitsRule	Specifies which of the two ancestral state reconstruction algorithms should be employed to assign internal nodes in a phylogeny to hosts. The options are Sankoff, s and Romero-Severson, r. For the Sankoff algorithm a diversity penalty, k should also be specified.	s, 20	Multiple introductions in a host might represent multiple infections or contamination by reads from another host. The Sankoff divserity penalty sets a threshold such that for two clades from the same host, k is the reciprocal of the minimum patristic distance between the most recent common ancester of nodes of the two clades that would suggest the two clades arose from separate infection events.T…
		--allowMultiTrans	Specifies that inferences on directionality between two individuals should not just be restricted to cases where each individual has a single subgraph and the two subgraphs are ancestral, but also include cases where both individuals have multiple subgraphs and all the subgraphs in one individual are ancestral to all those in another individual. A subgraph refers to all the tips and nodes in a ph…	Flag set
		--distanceThreshold	A pair of distance thresholds used to summarize pairwise relationships between individuals. Pairs of individuals whose subgraph distances are below the first threshold are classified as phylogenetically close. Comparatively, pairs with subgraph distances above the second threshold are classified as phylogenetically distant.	0.035 0.08 substitutions per site	A relaxed threshold motivated by previous work to optimize chances of identifying all probable phylogenetically close pairs (Ratmann, Grabowski et al. 2019).
		--minReadsPerHost	A minimum number of reads that an individual should have in a window to be included in analysis	1	Phyloscanner default. All individuals were retained.
		--minTipsPerHost	A minimum number of tips that an individual should have in a window to be included in analysis	1	Phyloscanner default. All individuals were retained.
		--multifurcationThreshold	A threshold to collapse branches shorter than a specified distance in deep-sequence trees to multifurcating internal nodes or polytomies	1e-05	Threshold was set to the minimum branch length value provided by RAxML.
		--multinomial	A model that computes scores between 0 and 1 for phylogenetic linkage and direction of transmission, adjusted for windows in which reads from one or other hosts are missing.	Flag set
		--normRefFileName	Specifies a file containing normalization values for each position along the genome. The file is produced by the stand-alone phyloscanner script, CalculateTreeSizeInGenomeWindows.py	HIV1_COM_2012_genome_DNA_SizeInWindows_ByPosition.csv	A patristic distance threshold suggestive of phylogenetic linkage in one window might not be in others. Therefore, the CalculateTreeSizeInGenomeWindows.py script was used to normalize branch lengths across windows. Group M whole genome sequences from the 2012 Los Alamos HIV sequence database were trimmed to windows of 200 bp starting from 1,000 to 9,408 that traversed the genome in 1 bp increment…
		--normStandardiseGagPol	Specifies that the normalizing constants be standardized so that the average on the concatenated gag+pol gene is 1, instead of the average across the whole genome being 1.	Flag set
		--outgroupName	Root	B.FR.83.HXB2_LAI_IIIB_BRU.K03455	Name of the root sequence, HXB2 in the background sequences file
		--parsimonyBlacklistK	Perform parsimony-based black listing to exlcude likely contaminant sequences using the specified Sankoff within-host diversity penalty value.	20
		--rawBlacklistThreshold	Subgraphs with read counts fewer than the set threshold are excluded as potential contaminants.	3	For each host, the --rawBlacklistThreshold option excludes reads that are small in number and substantially different from the rest of the reads in that host.
		--ratioBlacklistThreshold	Specifies a read count ratio between 0 and 1 for excluding likely contaminant reads. A subgraph is excluded if the total number of tips in that subgraph divided by that in another subgraph in the same individual is below the set threshold.	0	Alternative approach to the --rawBlacklistThreshold option for excluding likely contaminant reads.
		--postHocCountBlacklisting	Perform minimum tip and read based black listing as a separate step at the end of the analysis	Flag set	Phylosanner default.
		--readCountsMatterOnZeroLengthBranches	Specifies that parsimony-based ancestral state reconstructions at parents of zero-length branch lengths take into account read counts of children.	Flag set
		--relaxedAncestry		Flag set
Identify pairs of individuals between whom phylogenetic linkage was not excluded.	phyloscannerR:::find.pairs.in.networks()	indir	Full directory path to output of phyloscanner runs processed with phylocanner_analyse_trees.R		The function, find.pairs.in.networks() is part of a set of functions meant to facilitate re-construction of partial transmission networks identified with phyloscanner and is located in the Rscript, transmission_network_functions.R
		batch.regex	Regular expression to identify individual phyloscanner runs	'^cluster_([0-9]+)_workspace.*'
		linked.group	Phyloscanner classification used to identify pairs in networks	'close.and.adjacent.cat'	Phyloscanner default
		linked.no	Phyloscanner classification to denote unlinked pairs	'not.close.or.nonadjacent'	Phyloscanner default
		linked.yes	Phyloscanner classification to denote linked pairs	'close.and.adjacent'	Phyloscanner default
		conf.cut	Confidence threshold for classification of pairs. More precisely, the proportion of windows where deep-sequence trees have distant subgraphs for a pair of individuals above which the individuals are considered phylogenetically unlinked.	0.57
		neff.cut	Specifies the minimum number of deep-sequence trees with sufficient number of reads from a pair of individuals for analysis	3	Phyloscanner default
		dmeta	Metadata	csv file	A comma-separated-value format file comprising Individual-level metadata, for example, host_id, gender and sampling_year
Infer most likely transmission chains among pairs of individuals between whom transmission was not excluded. The transmission chains identified are considered to be partially sampled transmission chains.	phyloscannerR:::find.networks()	dc	A tibble that summarises the phylogenetic relationship counts for each pair	A tibble	The 'dc' file is generated with the function, find.pairs.in.networks() and provides for each pair, counts of how often certain phylogenetic relationships were seen across the genome. Types of phylogenetic relationships might include: ancestral-to, descendant-from, sibling and intermingled. A tibble is a contemporary data.frame in the R statistical programming language.
		batch.regex	Regular expression to identify individual phyloscanner runs	'^cluster_([0-9]+)_workspace.*'
		linked.group	Phyloscanner classification used to identify pairs in networks	'close.and.adjacent.cat'	Phyloscanner default
		linked.no	Phyloscanner classification to denote unlinked pairs	'not.close.or.nonadjacent'	Phyloscanner default
		linked.yes	Phyloscanner classification to denote linked pairs	'close.and.adjacent'	Phyloscanner default
		neff.cut	Specifies the minimum number of deep-sequence trees with sufficient number of reads from a pair of individuals for analysis	3	Phyloscanner default
Additional Programs	Input parameters	Description	Value	Comments
MAFFT (v. 7.407)
	--thread	Number of threads	-1	Number of threads determined by mafft program based on system resources.
	--op	Gap opening penalty	0.75	Default: 1.53
	--ep	Offset (works like gap extension penalty)	0.123	Default: 0.0
	--keeplength	Alignment length is left unchanged when flag is set	Flag set
	--add	Adding unaligned full-length sequence(s) into an existing alignment.	Flag set	Adds unalinged sequences to reference sequences.
HIValign
	DNA/Protein	Indicate whether to align DNA or protein sequences	DNA
	Organism	Organism sequences to align	HIV-1
	Region	Region to align	Complete	Align whole genomes
	Codon-align the sequences	Adjusts an alignment so that all codons are intact.	5	A compensating mutation must occur within 5 codons of an initial frameshift so that the shifted reading frame is left intact. HIValign default.
	Align the sequences	Pre-align sequences with MAFFT or HMM-align prior to codon alignment. This is a computationally intensive step	Flag not set	Sequences were already pre-aligned with MAFFT to speed up analysis. Please see description of MAFFT parameters above.
	Insert a reference sequence	Adds a reference sequence at the top of the set of input sequences, prior to alignment.	Flag not set	Input sequences already included a reference sequence, HXB2.
TN93 (v. 1.0.6)
	-t	Report pairwise distances below set threshold	1	Threshold set to 1 to compute and report pairwise distances for all possible pairs
HIV-TRACE (v. 0.4.4)
	--skip-alignment	Pre codon-aligned sequences submitted as input therefore skip alignment step	Flag set
	-u	Curate by removing spurious edges from the inferred network	remove	Sets strategy to handle potential contaminants.
	-a	Strategy for handling ambiguous nucleotides	resolve
	-r	Reference sequence	HXB2	Whole genome sequence of HXB2 was used
	-m	Minimum overlap.	500	Sequences must have at least this many aligned characters to be included in distance calculations.
	-g	Fraction	0.05	Sets the maximum fraction of resolvable ambiguous nucleotides. This mitigates spurious linkages due to highly ambiguous sequences.
	-t	Threshold	0.045	Distance threshold for inferring clusters
Cluster Picker (v. 1.2.3)
	Initial support threshold	The initial support threshold is used to split the tree into subtrees to reduce the number of computations.	0.8
	Support threshold	A main support threshold for clusters	0.8
	Genetic distance threshold	A genetic distance threshold for clusters	4.5	Provided as a percentage value
	Large cluster threshold	Output lists of clusters at or above a user-specified size	2	Output clusters comprising 2 or more members
FastTree2 (v2.1.10)
	-nt	Infer tree from a nucleotide alignment	Flag set
	-gtr	Generalized time-reversible substitution model	Flag set
	-gamma	Rate variation model.	Flag set	After optimizing the tree under the CAT approximation, rescale the lengths to optimize the Gamma20 likelihood
Shiver
	MaxContigGappiness	The maximum allowed percentage of gaps inside contigs when aligned to their closest reference	0.05
	MinContigHitFrac	The minimum fraction of a contig's length that blasts to HIV	0.9
	MafftArgsForPairwise	Use specified mafft options for pairwise alignment of references to HXB2	'--maxiterate 1000 --localpair'
	MinContigLength	Minimum contig length	300	Contigs shorter than this will be discarded at the start
	MinGapSizeToSplitGontig	Split contigs with large gaps. After alignment to a set of references, contigs with gaps of specifiied size or larger will be split.	160
	MinContigFragmentLength	For split contigs, keep fragments above the specified size	80
	TrimToKnownGenome	Trim overhangs after alignment	true
	ContigBlastArgs	Options to give blast when blasting the contigs	'-max_target_seqs 1 -word_size 17'
	MafftTestingStrategy	After aligning contigs to the existing reference alignment select alignment with the shortest length	'MinAlnLength'
	TrimReadsForAdaptersAndQual	Use trimmomatic to trim adapaters and low quality bases from reads	true
	IlluminaClipParams	Criteria for read trimming	'2:10:7:1:true'
	BaseQualityParams		'MINLEN:50 LEADING:20 TRAILING:20 SLIDINGWINDOW:4:20'
	NumThreadsTrimmomatic	Number of threads trimmomatic should use for computation	1
	TrimReadsForPrimers	Use fastaq to trim exact matches to PCR primers from the end of reads	true
	TrimPrimerWithOneSNP	Option to trim matches to the PCR primers that differ by a single base	false
	CleanReads	Remove read pairs that look like contaminants	true
	mapper	Use smalt to map reads	'smalt'
	smaltIndexOptions	Mapping options	'-k 15 -s 3'
	smaltMapOptions		'-x -y 0.7 -j 0 -i 2000'
	samtoolsReadFlags	Use SAM format flags to decides which reads to keep after mapping	'-f 3 -F 4'
	mpileupOptions	The minimum quality for a base to be retained is 5, and only the first 1000000 reads mapped to each point will be considered.	'--no-BAQ --min-BQ 5 --max-depth 1000000'
	MinCov1	The minimum coverage (number of reads) to call a base	15
	MinCov2	The minimum coverage to use upper case for the base (to signal increased confidence)	30
	MinBaseFrac	Call the single most common base regardless of its fraction, unless two or more bases are equally (most) common, then we call the ambiguity code for those bases	-1
	deduplicate	Remove read pairs marked as duplicates	true
	DeduplicationCommand	Use picard for deduplication	'picard MarkDuplicates'
	remap	Remap to the consensus	true
	MapContaminantReads	Map contaminant reads to the reference (separately), to see which reads would have contaminanted our final bam file had they not been removed	false
	GiveHXB2coords	Generate a version of the base frequencies file that also includes HXB2 coordinates	true
	AlignContigsToConsensus	Align the contigs to the consensus for comparison	false
	KeepPreMappingReads	Option to keep the reads in their state just before mapping (after any trimming of primers or adapters or low-quality bases, and after removal of suspected contaminant reads)	false

## Sheet: Supplementary file 1 Table 1C
Supplementary file 1 Table 1C. HIV-1 viral genotyping densities of communities in the Botswana Ya Tsie HIV trial
Community	Geographical region	Trial arm	Participated in end-of-study survey	Number of samples	Estimated number of people with HIV	Genotyping density	Number of seroconverters	Proportion of seroconverters
Maunatlala	Central East	Intervention	Yes	236	652.122	0.361895	1	0.00423729
Ramokgonami	Central East	Control	Yes	220	702.828	0.313021	5	0.0227273
Shakawe	North East	Control	Yes	313	1007.32	0.310724	7	0.0223642
Lentsweletau	South East	Intervention	No	206	786.59	0.26189	2	0.00970874
Lerala	Central East	Intervention	No	347	1414.47	0.245321	9	0.0259366
Nkange	North East	Intervention	No	107	471.876	0.226755	1	0.00934579
Gumare	North East	Intervention	Yes	260	1183.25	0.219733	2	0.00769231
Gweta	North East	Intervention	No	131	647.618	0.20228	7	0.0534351
Masunga	North East	Intervention	No	182	930.28	0.19564	3	0.0164835
Mmathethe	South East	Control	Yes	135	752.809	0.179328	3	0.0222222
Tati_siding	North East	Intervention	No	277	1669.34	0.165933	2	0.00722022
Mmankgodi	South East	Intervention	Yes	166	1106.41	0.150035	4	0.0240964
Rakops	North East	Control	No	92	673.64	0.136571	4	0.0434783
Sebina	North East	Control	No	51	374.546	0.136165	6	0.117647
Tsetsebjwe	Central East	Control	No	99	730.907	0.135448	6	0.0606061
Sefophe	Central East	Control	No	121	924.108	0.130937	4	0.0330579
Mathangwane	North East	Intervention	No	102	815.916	0.125013	5	0.0490196
Otse	South East	Intervention	No	99	906.145	0.109254	4	0.040404
Mmandunyane	North East	Control	No	56	550.59	0.101709	3	0.0535714
Letlhakeng	South East	Control	No	92	942.393	0.0976238	9	0.0978261
Bokaa	South East	Control	No	73	763.294	0.0956381	2	0.0273973
Nata	North East	Control	No	59	655.576	0.0899973	12	0.20339
Ranaka	South East	Control	No	34	519.152	0.0654914	1	0.0294118
Oodi	South East	Intervention	No	73	1191.01	0.0612927	5	0.0684932
Molapowabojang	South East	Control	No	60	1123.73	0.0533936	5	0.0833333
Mmadinare	Central East	Control	No	112	2184.11	0.0512795	4	0.0357143
Digawana	South East	Intervention	No	28	594.909	0.047066	0	0
Shoshong	Central East	Intervention	No	43	1172.14	0.0366849	4	0.0930233
Sefhare	Central East	Intervention	No	24	721.311	0.0332727	3	0.125
Metsimotlhabe	South East	Control	No	34	1277.91	0.0266059	1	0.0294118
Notes:
1. Seroconverters were defined as new HIV-1 infections that arose among participants during the trial
2. Estimates of the number of people with HIV aged 16-64 years in each trial community computed as outlined in the materials and methods.

## Sheet: Supplementary file 1 Table 1D
Supplementary file 1 Table 1D. Summary of viral suppression among trial participants in clusters of genetically similar HIV-1 infections
Lineage spread	No. of clusters	No. of clusters where all members were virally suppressed	No. of clusters where none of the members were virally suppressed	No. of clusters with mixed viral suppression levels
Localized to a single trial community	124	82	6	36
Spread across multiple trial communities	112	66	4	42
Note:
1. The union of genetic clusters inferred with HIV-TRACE and cluster picker algorithms is reported.

## Sheet: Supplementary file 1 Table 1E
Supplementary file 1 Table 1E. Quantiles of age differences between males and females in inferred transmission pairs before and after adjustment for sampling variability
		Quantiles
	Age difference between male and females	0	0.25	0.5	0.75	1
Before adjustment for sampling variability	Overall	-28.6	-1.575	3.85	8.4	26
	female-to-male transmission events	-28.6	-1.9	2.9	10	20.6
	male-to-female transmission events	-14.3	1.8	5.7	8	26
After adjustment for sampling variability	Overall	-28.6	-3	2.7	7.05519	25.0222
	female-to-male transmission events	-28.6	-4.94237	0.78018	6.12774	19.4195
	male-to-female transmission events	-12.0944	-2.42999	3.59393	7.2877	25.0845
Notes:
Quantiles were computed with the Type 7 estimator according to the notation of Hyndman and Fan ("Sample Quantiles in Statistical Packages," The American Statistician, 1996)

## Sheet: Supplementary file 1 Table 1F
Supplementary file 1 Table 1F. Observed and predicted proportions of HIV-1 transmissions in the trial population by age group
Age group of transmitter in years (Group 1)	Age group of transmitter in years (Group 2)	Number of individuals sampled from group 1	Number of individuals sampled from group 2	Estimated number of individuals with HIV in group 1	Estimated number of individuals with HIV in group 2	Observed number of highly supported probable transmission pairs in the deep-sequenced sample (n = 82)	Unadjusted proportion of highly supported probable transmission pairs in the deep-sequenced sample (n = 82)	95% Lower confidence bound for unadjusted proportion (Goodman method)	95% Upper confidence bound for unadjusted proportion (Goodman method)	Estimated proportion of HIV transmissions in the trial population	95% Lower confidence bound for estimated proportion of HIV transmissions in trial population (Goodman method)	95% Upper confidence bound for estimated proportion of HIV transmissions in trial population (Goodman method)
26_to_30_years	26_to_30_years	402	402	3248.3	3248.3	7	0.0853659	0.00438333	0.664273	0.110926	0.00647866	0.685979
36_to_40_years	41_to_45_years	681	638	4973.95	4356.44	6	0.0731707	0.00326277	0.655649	0.0724676	0.00270457	0.659482
41_to_45_years	36_to_40_years	638	681	4356.44	4973.95	4	0.0487805	0.0014904	0.63793	0.0483117	0.00112477	0.642076
21_to_25_years	26_to_30_years	251	402	1486.57	3248.3	3	0.0365854	0.000850488	0.628825	0.034769	0.000527371	0.632041
31_to_35_years	26_to_30_years	622	402	4627.1	3248.3	3	0.0365854	0.000850488	0.628825	0.0436714	0.000896006	0.638661
41_to_45_years	31_to_35_years	638	622	4356.44	4627.1	3	0.0365854	0.000850488	0.628825	0.0369044	0.000607266	0.633637
41_to_45_years	41_to_45_years	638	638	4356.44	4356.44	3	0.0365854	0.000850488	0.628825	0.0339197	0.000497108	0.631404
46_to_50_years	41_to_45_years	424	638	3180.26	4356.44	3	0.0365854	0.000850488	0.628825	0.0372097	0.000619133	0.633865
21_to_25_years	21_to_25_years	251	251	1486.57	1486.57	2	0.0243902	0.000383656	0.619546	0.0170461	7.86318e-05	0.618588
26_to_30_years	31_to_35_years	402	622	3248.3	4627.1	2	0.0243902	0.000383656	0.619546	0.0291143	0.000342245	0.627788
26_to_30_years	36_to_40_years	402	681	3248.3	4973.95	2	0.0243902	0.000383656	0.619546	0.0285852	0.000326909	0.627389
26_to_30_years	46_to_50_years	402	424	3248.3	3180.26	2	0.0243902	0.000383656	0.619546	0.0293552	0.000349341	0.62797
31_to_35_years	21_to_25_years	622	251	4627.1	1486.57	2	0.0243902	0.000383656	0.619546	0.0213397	0.000151563	0.621881
31_to_35_years	31_to_35_years	622	622	4627.1	4627.1	2	0.0243902	0.000383656	0.619546	0.026841	0.000278769	0.626068
36_to_40_years	51_to_55_years	681	328	4973.95	2241.04	2	0.0243902	0.000383656	0.619546	0.0241706	0.000212327	0.62404
41_to_45_years	26_to_30_years	638	402	4356.44	3248.3	2	0.0243902	0.000383656	0.619546	0.0267238	0.000275669	0.62598
41_to_45_years	46_to_50_years	638	424	4356.44	3180.26	2	0.0243902	0.000383656	0.619546	0.0248065	0.000227348	0.624524
41_to_45_years	56_to_60_years	638	262	4356.44	1415.31	2	0.0243902	0.000383656	0.619546	0.0178657	9.0749e-05	0.619218
56_to_60_years	46_to_50_years	262	424	1415.31	3180.26	2	0.0243902	0.000383656	0.619546	0.0196248	0.000119637	0.620568
61_to_64_years	46_to_50_years	100	424	678.28	3180.26	2	0.0243902	0.000383656	0.619546	0.0246413	0.000223397	0.624398
61_to_64_years	56_to_60_years	100	262	678.28	1415.31	2	0.0243902	0.000383656	0.619546	0.0177467	8.89368e-05	0.619127
21_to_25_years	31_to_35_years	251	622	1486.57	4627.1	1	0.0121951	9.74011e-05	0.610087	0.0106699	1.38279e-05	0.613655
26_to_30_years	41_to_45_years	402	638	3248.3	4356.44	1	0.0121951	9.74011e-05	0.610087	0.0133619	3.47819e-05	0.615744
31_to_35_years	36_to_40_years	622	681	4627.1	4973.95	1	0.0121951	9.74011e-05	0.610087	0.0131583	3.28683e-05	0.615586
36_to_40_years	26_to_30_years	681	402	4973.95	3248.3	1	0.0121951	9.74011e-05	0.610087	0.0142926	4.42119e-05	0.616464
36_to_40_years	31_to_35_years	681	622	4973.95	4627.1	1	0.0121951	9.74011e-05	0.610087	0.0131583	3.28683e-05	0.615586
36_to_40_years	56_to_60_years	681	262	4973.95	1415.31	1	0.0121951	9.74011e-05	0.610087	0.00955504	7.91853e-06	0.612788
41_to_45_years	16_to_20_years	638	124	4356.44	1013.99	1	0.0121951	9.74011e-05	0.610087	0.0135223	3.63268e-05	0.615868
41_to_45_years	21_to_25_years	638	251	4356.44	1486.57	1	0.0121951	9.74011e-05	0.610087	0.0097938	9.04708e-06	0.612973
41_to_45_years	51_to_55_years	638	328	4356.44	2241.04	1	0.0121951	9.74011e-05	0.610087	0.0112983	1.78759e-05	0.614144
46_to_50_years	16_to_20_years	424	124	3180.26	1013.99	1	0.0121951	9.74011e-05	0.610087	0.0148537	5.04366e-05	0.616897
46_to_50_years	36_to_40_years	424	681	3180.26	4973.95	1	0.0121951	9.74011e-05	0.610087	0.0132672	3.38849e-05	0.61567
46_to_50_years	46_to_50_years	424	424	3180.26	3180.26	1	0.0121951	9.74011e-05	0.610087	0.0136524	3.76054e-05	0.615969
46_to_50_years	51_to_55_years	424	328	3180.26	2241.04	1	0.0121951	9.74011e-05	0.610087	0.0124108	2.6303e-05	0.615007
46_to_50_years	56_to_60_years	424	262	3180.26	1415.31	1	0.0121951	9.74011e-05	0.610087	0.00981239	9.13812e-06	0.612988
51_to_55_years	21_to_25_years	328	251	2241.04	1486.57	1	0.0121951	9.74011e-05	0.610087	0.00979978	9.07634e-06	0.612978
51_to_55_years	41_to_45_years	328	638	2241.04	4356.44	1	0.0121951	9.74011e-05	0.610087	0.0112983	1.78759e-05	0.614144
51_to_55_years	46_to_50_years	328	424	2241.04	3180.26	1	0.0121951	9.74011e-05	0.610087	0.0124108	2.6303e-05	0.615007
51_to_55_years	51_to_55_years	328	328	2241.04	2241.04	1	0.0121951	9.74011e-05	0.610087	0.0113348	1.81262e-05	0.614172
56_to_60_years	26_to_30_years	262	402	1415.31	3248.3	1	0.0121951	9.74011e-05	0.610087	0.0105708	1.32371e-05	0.613578
56_to_60_years	36_to_40_years	262	681	1415.31	4973.95	1	0.0121951	9.74011e-05	0.610087	0.00955504	7.91853e-06	0.612788
56_to_60_years	41_to_45_years	262	638	1415.31	4356.44	1	0.0121951	9.74011e-05	0.610087	0.00893283	5.3293e-06	0.612303
56_to_60_years	51_to_55_years	262	328	1415.31	2241.04	1	0.0121951	9.74011e-05	0.610087	0.00893829	5.3498e-06	0.612307
56_to_60_years	56_to_60_years	262	262	1415.31	1415.31	1	0.0121951	9.74011e-05	0.610087	0.00708896	6.5319e-07	0.610863
61_to_64_years	51_to_55_years	100	328	678.28	2241.04	1	0.0121951	9.74011e-05	0.610087	0.0112231	1.73641e-05	0.614085
16_to_20_years	16_to_20_years	124	124	1013.99	1013.99	0	0	0	0.600439	0	2.4945e-05	0.605287
16_to_20_years	21_to_25_years	124	251	1013.99	1486.57	0	0	0	0.600439	0	2.4945e-05	0.605287
16_to_20_years	26_to_30_years	124	402	1013.99	3248.3	0	0	0	0.600439	0	2.4945e-05	0.605287
16_to_20_years	31_to_35_years	124	622	1013.99	4627.1	0	0	0	0.600439	0	2.4945e-05	0.605287
16_to_20_years	36_to_40_years	124	681	1013.99	4973.95	0	0	0	0.600439	0	2.4945e-05	0.605287
16_to_20_years	41_to_45_years	124	638	1013.99	4356.44	0	0	0	0.600439	0	2.4945e-05	0.605287
16_to_20_years	46_to_50_years	124	424	1013.99	3180.26	0	0	0	0.600439	0	2.4945e-05	0.605287
16_to_20_years	51_to_55_years	124	328	1013.99	2241.04	0	0	0	0.600439	0	2.4945e-05	0.605287
16_to_20_years	56_to_60_years	124	262	1013.99	1415.31	0	0	0	0.600439	0	2.4945e-05	0.605287
16_to_20_years	61_to_64_years	124	100	1013.99	678.28	0	0	0	0.600439	0	2.4945e-05	0.605287
21_to_25_years	16_to_20_years	251	124	1486.57	1013.99	0	0	0	0.600439	0	2.4945e-05	0.605287
21_to_25_years	36_to_40_years	251	681	1486.57	4973.95	0	0	0	0.600439	0	2.4945e-05	0.605287
21_to_25_years	41_to_45_years	251	638	1486.57	4356.44	0	0	0	0.600439	0	2.4945e-05	0.605287
21_to_25_years	46_to_50_years	251	424	1486.57	3180.26	0	0	0	0.600439	0	2.4945e-05	0.605287
21_to_25_years	51_to_55_years	251	328	1486.57	2241.04	0	0	0	0.600439	0	2.4945e-05	0.605287
21_to_25_years	56_to_60_years	251	262	1486.57	1415.31	0	0	0	0.600439	0	2.4945e-05	0.605287
21_to_25_years	61_to_64_years	251	100	1486.57	678.28	0	0	0	0.600439	0	2.4945e-05	0.605287
26_to_30_years	16_to_20_years	402	124	3248.3	1013.99	0	0	0	0.600439	0	2.4945e-05	0.605287
26_to_30_years	21_to_25_years	402	251	3248.3	1486.57	0	0	0	0.600439	0	2.4945e-05	0.605287
26_to_30_years	51_to_55_years	402	328	3248.3	2241.04	0	0	0	0.600439	0	2.4945e-05	0.605287
26_to_30_years	56_to_60_years	402	262	3248.3	1415.31	0	0	0	0.600439	0	2.4945e-05	0.605287
26_to_30_years	61_to_64_years	402	100	3248.3	678.28	0	0	0	0.600439	0	2.4945e-05	0.605287
31_to_35_years	16_to_20_years	622	124	4627.1	1013.99	0	0	0	0.600439	0	2.4945e-05	0.605287
31_to_35_years	41_to_45_years	622	638	4627.1	4356.44	0	0	0	0.600439	0	2.4945e-05	0.605287
31_to_35_years	46_to_50_years	622	424	4627.1	3180.26	0	0	0	0.600439	0	2.4945e-05	0.605287
31_to_35_years	51_to_55_years	622	328	4627.1	2241.04	0	0	0	0.600439	0	2.4945e-05	0.605287
31_to_35_years	56_to_60_years	622	262	4627.1	1415.31	0	0	0	0.600439	0	2.4945e-05	0.605287
31_to_35_years	61_to_64_years	622	100	4627.1	678.28	0	0	0	0.600439	0	2.4945e-05	0.605287
36_to_40_years	16_to_20_years	681	124	4973.95	1013.99	0	0	0	0.600439	0	2.4945e-05	0.605287
36_to_40_years	21_to_25_years	681	251	4973.95	1486.57	0	0	0	0.600439	0	2.4945e-05	0.605287
36_to_40_years	36_to_40_years	681	681	4973.95	4973.95	0	0	0	0.600439	0	2.4945e-05	0.605287
36_to_40_years	46_to_50_years	681	424	4973.95	3180.26	0	0	0	0.600439	0	2.4945e-05	0.605287
36_to_40_years	61_to_64_years	681	100	4973.95	678.28	0	0	0	0.600439	0	2.4945e-05	0.605287
41_to_45_years	61_to_64_years	638	100	4356.44	678.28	0	0	0	0.600439	0	2.4945e-05	0.605287
46_to_50_years	21_to_25_years	424	251	3180.26	1486.57	0	0	0	0.600439	0	2.4945e-05	0.605287
46_to_50_years	26_to_30_years	424	402	3180.26	3248.3	0	0	0	0.600439	0	2.4945e-05	0.605287
46_to_50_years	31_to_35_years	424	622	3180.26	4627.1	0	0	0	0.600439	0	2.4945e-05	0.605287
46_to_50_years	61_to_64_years	424	100	3180.26	678.28	0	0	0	0.600439	0	2.4945e-05	0.605287
51_to_55_years	16_to_20_years	328	124	2241.04	1013.99	0	0	0	0.600439	0	2.4945e-05	0.605287
51_to_55_years	26_to_30_years	328	402	2241.04	3248.3	0	0	0	0.600439	0	2.4945e-05	0.605287
51_to_55_years	31_to_35_years	328	622	2241.04	4627.1	0	0	0	0.600439	0	2.4945e-05	0.605287
51_to_55_years	36_to_40_years	328	681	2241.04	4973.95	0	0	0	0.600439	0	2.4945e-05	0.605287
51_to_55_years	56_to_60_years	328	262	2241.04	1415.31	0	0	0	0.600439	0	2.4945e-05	0.605287
51_to_55_years	61_to_64_years	328	100	2241.04	678.28	0	0	0	0.600439	0	2.4945e-05	0.605287
56_to_60_years	16_to_20_years	262	124	1415.31	1013.99	0	0	0	0.600439	0	2.4945e-05	0.605287
56_to_60_years	21_to_25_years	262	251	1415.31	1486.57	0	0	0	0.600439	0	2.4945e-05	0.605287
56_to_60_years	31_to_35_years	262	622	1415.31	4627.1	0	0	0	0.600439	0	2.4945e-05	0.605287
56_to_60_years	61_to_64_years	262	100	1415.31	678.28	0	0	0	0.600439	0	2.4945e-05	0.605287
61_to_64_years	16_to_20_years	100	124	678.28	1013.99	0	0	0	0.600439	0	2.4945e-05	0.605287
61_to_64_years	21_to_25_years	100	251	678.28	1486.57	0	0	0	0.600439	0	2.4945e-05	0.605287
61_to_64_years	26_to_30_years	100	402	678.28	3248.3	0	0	0	0.600439	0	2.4945e-05	0.605287
61_to_64_years	31_to_35_years	100	622	678.28	4627.1	0	0	0	0.600439	0	2.4945e-05	0.605287
61_to_64_years	36_to_40_years	100	681	678.28	4973.95	0	0	0	0.600439	0	2.4945e-05	0.605287
61_to_64_years	41_to_45_years	100	638	678.28	4356.44	0	0	0	0.600439	0	2.4945e-05	0.605287
61_to_64_years	61_to_64_years	100	100	678.28	678.28	0	0	0	0.600439	0	2.4945e-05	0.605287
Notes:
1. Estimated proportions of HIV-1 transmissions in the trial population were adjusted for differential sampling by 5-year age group
2. Simultaneous confidence intervals at the 5% significance level were estimated with the Goodman method as described in the materials and methods

## Sheet: Supplementary file 1 Table 1G
Supplementary file 1 Table 1G. Observed and predicted proportions of HIV-1 transmissions in the trial population by gender and age group
Age group of transmitter in years (Group 1)	Age group of transmitter in years (Group 2)	Number of individuals sampled from group 1	Number of individuals sampled from group 2	Estimated number of individuals with HIV in group 1	Estimated number of individuals with HIV in group 2	Observed number of highly supported probable transmission pairs in the deep-sequenced sample (n = 82)	Unadjusted proportion of highly supported probable transmission pairs in the deep-sequenced sample (n = 82)	95% Lower confidence bound for unadjusted proportion (Goodman method)	95% Upper confidence bound for unadjusted proportion (Goodman method)	Estimated proportion of HIV transmissions in the trial population	95% Lower confidence bound for estimated proportion of HIV transmissions in trial population (Goodman method)	95% Upper confidence bound for estimated proportion of HIV transmissions in trial population (Goodman method)
M_26_to_30_years	F_26_to_30_years	72	330	1134.86	2113.44	4	0.0487805	0.000429456	0.859571	0.0854148	0.00112395	0.871769
F_21_to_25_years	M_26_to_30_years	208	72	958.539	1134.86	3	0.0365854	0.000242584	0.855974	0.0460962	0.000289617	0.860569
F_26_to_30_years	M_26_to_30_years	330	72	2113.44	1134.86	3	0.0365854	0.000242584	0.855974	0.0640611	0.000604487	0.865752
F_36_to_40_years	M_41_to_45_years	465	193	3120.22	1499.86	3	0.0365854	0.000242584	0.855974	0.0330928	0.000132519	0.856747
M_36_to_40_years	F_41_to_45_years	216	445	1853.73	2856.58	3	0.0365854	0.000242584	0.855974	0.0349612	0.000151398	0.8573
M_41_to_45_years	F_31_to_35_years	193	464	1499.86	2917.12	3	0.0365854	0.000242584	0.855974	0.0310054	0.000112901	0.856128
M_41_to_45_years	F_36_to_40_years	193	465	1499.86	3120.22	3	0.0365854	0.000242584	0.855974	0.0330928	0.000132519	0.856747
M_46_to_50_years	F_41_to_45_years	145	445	1030.45	2856.58	3	0.0365854	0.000242584	0.855974	0.0289503	9.51073e-05	0.855517
F_21_to_25_years	M_21_to_25_years	208	43	958.539	528.035	2	0.0243902	0.000108277	0.852325	0.0239418	5.80913e-05	0.854022
F_26_to_30_years	M_36_to_40_years	330	216	2113.44	1853.73	2	0.0243902	0.000108277	0.852325	0.0232533	5.37082e-05	0.853816
F_26_to_30_years	M_46_to_50_years	330	145	2113.44	1030.45	2	0.0243902	0.000108277	0.852325	0.0192553	3.16379e-05	0.852615
F_36_to_40_years	M_51_to_55_years	465	115	3120.22	705.13	2	0.0243902	0.000108277	0.852325	0.0174069	2.33886e-05	0.852058
F_41_to_45_years	M_26_to_30_years	445	72	2856.58	1134.86	2	0.0243902	0.000108277	0.852325	0.0428069	0.00024422	0.859608
F_41_to_45_years	M_41_to_45_years	445	193	2856.58	1499.86	2	0.0243902	0.000108277	0.852325	0.0211055	4.11337e-05	0.853171
M_31_to_35_years	F_21_to_25_years	158	208	1709.97	958.539	2	0.0243902	0.000108277	0.852325	0.0211006	4.1107e-05	0.85317
M_31_to_35_years	F_26_to_30_years	158	330	1709.97	2113.44	2	0.0243902	0.000108277	0.852325	0.0293241	9.82317e-05	0.855628
M_31_to_35_years	F_31_to_35_years	158	464	1709.97	2917.12	2	0.0243902	0.000108277	0.852325	0.0287863	9.37531e-05	0.855468
M_61_to_64_years	F_46_to_50_years	38	279	209.875	2149.81	2	0.0243902	0.000108277	0.852325	0.0180049	2.5922e-05	0.852238
M_61_to_64_years	F_56_to_60_years	38	163	209.875	965.965	2	0.0243902	0.000108277	0.852325	0.0138474	1.09971e-05	0.850981
F_21_to_25_years	M_31_to_35_years	208	158	958.539	1709.97	1	0.0121951	2.71873e-05	0.848622	0.0105503	3.63472e-06	0.84998
F_26_to_30_years	M_31_to_35_years	330	158	2113.44	1709.97	1	0.0121951	2.71873e-05	0.848622	0.0146621	1.34266e-05	0.851228
F_26_to_30_years	M_41_to_45_years	330	193	2113.44	1499.86	1	0.0121951	2.71873e-05	0.848622	0.0105282	3.59879e-06	0.849974
F_31_to_35_years	M_26_to_30_years	464	72	2917.12	1134.86	1	0.0121951	2.71873e-05	0.848622	0.0209621	4.03531e-05	0.853128
F_36_to_40_years	M_56_to_60_years	465	99	3120.22	449.346	1	0.0121951	2.71873e-05	0.848622	0.00644266	2.18647e-08	0.848728
F_41_to_45_years	M_36_to_40_years	445	216	2856.58	1853.73	1	0.0121951	2.71873e-05	0.848622	0.0116537	5.65706e-06	0.850316
F_41_to_45_years	M_46_to_50_years	445	145	2856.58	1030.45	1	0.0121951	2.71873e-05	0.848622	0.00965009	2.31435e-06	0.849706
F_41_to_45_years	M_51_to_55_years	445	115	2856.58	705.13	1	0.0121951	2.71873e-05	0.848622	0.00832615	9.11226e-07	0.849303
F_41_to_45_years	M_56_to_60_years	445	99	2856.58	449.346	1	0.0121951	2.71873e-05	0.848622	0.00616338	7.95395e-10	0.848642
F_46_to_50_years	M_16_to_20_years	279	23	2149.81	410.444	1	0.0121951	2.71873e-05	0.848622	0.0290877	9.62497e-05	0.855558
F_46_to_50_years	M_51_to_55_years	279	115	2149.81	705.13	1	0.0121951	2.71873e-05	0.848622	0.00999435	2.78428e-06	0.849811
F_46_to_50_years	M_56_to_60_years	279	99	2149.81	449.346	1	0.0121951	2.71873e-05	0.848622	0.00739825	3.10497e-07	0.84902
F_51_to_55_years	M_51_to_55_years	213	115	1535.91	705.13	1	0.0121951	2.71873e-05	0.848622	0.00935287	1.94351e-06	0.849616
F_56_to_60_years	M_26_to_30_years	163	72	965.965	1134.86	1	0.0121951	2.71873e-05	0.848622	0.0197593	3.41016e-05	0.852767
F_56_to_60_years	M_36_to_40_years	163	216	965.965	1853.73	1	0.0121951	2.71873e-05	0.848622	0.0107585	3.98229e-06	0.850044
F_56_to_60_years	M_46_to_50_years	163	145	965.965	1030.45	1	0.0121951	2.71873e-05	0.848622	0.00890879	1.44966e-06	0.849481
M_26_to_30_years	F_31_to_35_years	72	464	1134.86	2917.12	1	0.0121951	2.71873e-05	0.848622	0.0209621	4.03531e-05	0.853128
M_31_to_35_years	F_36_to_40_years	158	465	1709.97	3120.22	1	0.0121951	2.71873e-05	0.848622	0.0153621	1.57074e-05	0.85144
M_36_to_40_years	F_26_to_30_years	216	330	1853.73	2113.44	1	0.0121951	2.71873e-05	0.848622	0.0116267	5.60211e-06	0.850308
M_36_to_40_years	F_31_to_35_years	216	464	1853.73	2917.12	1	0.0121951	2.71873e-05	0.848622	0.0114134	5.17874e-06	0.850243
M_41_to_45_years	F_16_to_20_years	193	101	1499.86	603.544	1	0.0121951	2.71873e-05	0.848622	0.00982353	2.54569e-06	0.849759
M_41_to_45_years	F_21_to_25_years	193	208	1499.86	958.539	1	0.0121951	2.71873e-05	0.848622	0.00757576	4.01008e-07	0.849074
M_41_to_45_years	F_41_to_45_years	193	445	1499.86	2856.58	1	0.0121951	2.71873e-05	0.848622	0.0105528	3.6387e-06	0.849981
M_41_to_45_years	F_46_to_50_years	193	279	1499.86	2149.81	1	0.0121951	2.71873e-05	0.848622	0.0126671	7.90576e-06	0.850624
M_41_to_45_years	F_56_to_60_years	193	163	1499.86	965.965	1	0.0121951	2.71873e-05	0.848622	0.00974213	2.43575e-06	0.849734
M_46_to_50_years	F_36_to_40_years	145	465	1030.45	3120.22	1	0.0121951	2.71873e-05	0.848622	0.0100874	2.91868e-06	0.84984
M_46_to_50_years	F_46_to_50_years	145	279	1030.45	2149.81	1	0.0121951	2.71873e-05	0.848622	0.0115835	5.51515e-06	0.850295
M_51_to_55_years	F_21_to_25_years	115	208	705.13	958.539	1	0.0121951	2.71873e-05	0.848622	0.00597729	2.65599e-09	0.848585
M_51_to_55_years	F_41_to_45_years	115	445	705.13	2856.58	1	0.0121951	2.71873e-05	0.848622	0.00832615	9.11226e-07	0.849303
M_51_to_55_years	F_46_to_50_years	115	279	705.13	2149.81	1	0.0121951	2.71873e-05	0.848622	0.00999435	2.78428e-06	0.849811
M_56_to_60_years	F_41_to_45_years	99	445	449.346	2856.58	1	0.0121951	2.71873e-05	0.848622	0.00616338	7.95395e-10	0.848642
M_56_to_60_years	F_46_to_50_years	99	279	449.346	2149.81	1	0.0121951	2.71873e-05	0.848622	0.00739825	3.10497e-07	0.84902
M_56_to_60_years	F_51_to_55_years	99	213	449.346	1535.91	1	0.0121951	2.71873e-05	0.848622	0.0069234	1.25192e-07	0.848875
M_56_to_60_years	F_56_to_60_years	99	163	449.346	965.965	1	0.0121951	2.71873e-05	0.848622	0.00568992	3.05164e-08	0.848498
M_61_to_64_years	F_51_to_55_years	38	213	209.875	1535.91	1	0.0121951	2.71873e-05	0.848622	0.00842464	9.93509e-07	0.849333
F_16_to_20_years	F_16_to_20_years	101	101	603.544	603.544	-	-	-	-	-	-	-
F_16_to_20_years	F_21_to_25_years	101	208	603.544	958.539	-	-	-	-	-	-	-
F_16_to_20_years	F_26_to_30_years	101	330	603.544	2113.44	-	-	-	-	-	-	-
F_16_to_20_years	F_31_to_35_years	101	464	603.544	2917.12	-	-	-	-	-	-	-
F_16_to_20_years	F_36_to_40_years	101	465	603.544	3120.22	-	-	-	-	-	-	-
F_16_to_20_years	F_41_to_45_years	101	445	603.544	2856.58	-	-	-	-	-	-	-
F_16_to_20_years	F_46_to_50_years	101	279	603.544	2149.81	-	-	-	-	-	-	-
F_16_to_20_years	F_51_to_55_years	101	213	603.544	1535.91	-	-	-	-	-	-	-
F_16_to_20_years	F_56_to_60_years	101	163	603.544	965.965	-	-	-	-	-	-	-
F_16_to_20_years	F_61_to_64_years	101	62	603.544	468.404	-	-	-	-	-	-	-
F_16_to_20_years	M_16_to_20_years	101	23	603.544	410.444	0	0	0	0.844866	0	6.84242e-06	0.846751
F_16_to_20_years	M_21_to_25_years	101	43	603.544	528.035	0	0	0	0.844866	0	6.84242e-06	0.846751
F_16_to_20_years	M_26_to_30_years	101	72	603.544	1134.86	0	0	0	0.844866	0	6.84242e-06	0.846751
F_16_to_20_years	M_31_to_35_years	101	158	603.544	1709.97	0	0	0	0.844866	0	6.84242e-06	0.846751
F_16_to_20_years	M_36_to_40_years	101	216	603.544	1853.73	0	0	0	0.844866	0	6.84242e-06	0.846751
F_16_to_20_years	M_41_to_45_years	101	193	603.544	1499.86	0	0	0	0.844866	0	6.84242e-06	0.846751
F_16_to_20_years	M_46_to_50_years	101	145	603.544	1030.45	0	0	0	0.844866	0	6.84242e-06	0.846751
F_16_to_20_years	M_51_to_55_years	101	115	603.544	705.13	0	0	0	0.844866	0	6.84242e-06	0.846751
F_16_to_20_years	M_56_to_60_years	101	99	603.544	449.346	0	0	0	0.844866	0	6.84242e-06	0.846751
F_16_to_20_years	M_61_to_64_years	101	38	603.544	209.875	0	0	0	0.844866	0	6.84242e-06	0.846751
F_21_to_25_years	F_16_to_20_years	208	101	958.539	603.544	-	-	-	-	-	-	-
F_21_to_25_years	F_21_to_25_years	208	208	958.539	958.539	-	-	-	-	-	-	-
F_21_to_25_years	F_26_to_30_years	208	330	958.539	2113.44	-	-	-	-	-	-	-
F_21_to_25_years	F_31_to_35_years	208	464	958.539	2917.12	-	-	-	-	-	-	-
F_21_to_25_years	F_36_to_40_years	208	465	958.539	3120.22	-	-	-	-	-	-	-
F_21_to_25_years	F_41_to_45_years	208	445	958.539	2856.58	-	-	-	-	-	-	-
F_21_to_25_years	F_46_to_50_years	208	279	958.539	2149.81	-	-	-	-	-	-	-
F_21_to_25_years	F_51_to_55_years	208	213	958.539	1535.91	-	-	-	-	-	-	-
F_21_to_25_years	F_56_to_60_years	208	163	958.539	965.965	-	-	-	-	-	-	-
F_21_to_25_years	F_61_to_64_years	208	62	958.539	468.404	-	-	-	-	-	-	-
F_21_to_25_years	M_16_to_20_years	208	23	958.539	410.444	0	0	0	0.844866	0	6.84242e-06	0.846751
F_21_to_25_years	M_36_to_40_years	208	216	958.539	1853.73	0	0	0	0.844866	0	6.84242e-06	0.846751
F_21_to_25_years	M_41_to_45_years	208	193	958.539	1499.86	0	0	0	0.844866	0	6.84242e-06	0.846751
F_21_to_25_years	M_46_to_50_years	208	145	958.539	1030.45	0	0	0	0.844866	0	6.84242e-06	0.846751
F_21_to_25_years	M_51_to_55_years	208	115	958.539	705.13	0	0	0	0.844866	0	6.84242e-06	0.846751
F_21_to_25_years	M_56_to_60_years	208	99	958.539	449.346	0	0	0	0.844866	0	6.84242e-06	0.846751
F_21_to_25_years	M_61_to_64_years	208	38	958.539	209.875	0	0	0	0.844866	0	6.84242e-06	0.846751
F_26_to_30_years	F_16_to_20_years	330	101	2113.44	603.544	-	-	-	-	-	-	-
F_26_to_30_years	F_21_to_25_years	330	208	2113.44	958.539	-	-	-	-	-	-	-
F_26_to_30_years	F_26_to_30_years	330	330	2113.44	2113.44	-	-	-	-	-	-	-
F_26_to_30_years	F_31_to_35_years	330	464	2113.44	2917.12	-	-	-	-	-	-	-
F_26_to_30_years	F_36_to_40_years	330	465	2113.44	3120.22	-	-	-	-	-	-	-
F_26_to_30_years	F_41_to_45_years	330	445	2113.44	2856.58	-	-	-	-	-	-	-
F_26_to_30_years	F_46_to_50_years	330	279	2113.44	2149.81	-	-	-	-	-	-	-
F_26_to_30_years	F_51_to_55_years	330	213	2113.44	1535.91	-	-	-	-	-	-	-
F_26_to_30_years	F_56_to_60_years	330	163	2113.44	965.965	-	-	-	-	-	-	-
F_26_to_30_years	F_61_to_64_years	330	62	2113.44	468.404	-	-	-	-	-	-	-
F_26_to_30_years	M_16_to_20_years	330	23	2113.44	410.444	0	0	0	0.844866	0	6.84242e-06	0.846751
F_26_to_30_years	M_21_to_25_years	330	43	2113.44	528.035	0	0	0	0.844866	0	6.84242e-06	0.846751
F_26_to_30_years	M_51_to_55_years	330	115	2113.44	705.13	0	0	0	0.844866	0	6.84242e-06	0.846751
F_26_to_30_years	M_56_to_60_years	330	99	2113.44	449.346	0	0	0	0.844866	0	6.84242e-06	0.846751
F_26_to_30_years	M_61_to_64_years	330	38	2113.44	209.875	0	0	0	0.844866	0	6.84242e-06	0.846751
F_31_to_35_years	F_16_to_20_years	464	101	2917.12	603.544	-	-	-	-	-	-	-
F_31_to_35_years	F_21_to_25_years	464	208	2917.12	958.539	-	-	-	-	-	-	-
F_31_to_35_years	F_26_to_30_years	464	330	2917.12	2113.44	-	-	-	-	-	-	-
F_31_to_35_years	F_31_to_35_years	464	464	2917.12	2917.12	-	-	-	-	-	-	-
F_31_to_35_years	F_36_to_40_years	464	465	2917.12	3120.22	-	-	-	-	-	-	-
F_31_to_35_years	F_41_to_45_years	464	445	2917.12	2856.58	-	-	-	-	-	-	-
F_31_to_35_years	F_46_to_50_years	464	279	2917.12	2149.81	-	-	-	-	-	-	-
F_31_to_35_years	F_51_to_55_years	464	213	2917.12	1535.91	-	-	-	-	-	-	-
F_31_to_35_years	F_56_to_60_years	464	163	2917.12	965.965	-	-	-	-	-	-	-
F_31_to_35_years	F_61_to_64_years	464	62	2917.12	468.404	-	-	-	-	-	-	-
F_31_to_35_years	M_16_to_20_years	464	23	2917.12	410.444	0	0	0	0.844866	0	6.84242e-06	0.846751
F_31_to_35_years	M_21_to_25_years	464	43	2917.12	528.035	0	0	0	0.844866	0	6.84242e-06	0.846751
F_31_to_35_years	M_31_to_35_years	464	158	2917.12	1709.97	0	0	0	0.844866	0	6.84242e-06	0.846751
F_31_to_35_years	M_36_to_40_years	464	216	2917.12	1853.73	0	0	0	0.844866	0	6.84242e-06	0.846751
F_31_to_35_years	M_41_to_45_years	464	193	2917.12	1499.86	0	0	0	0.844866	0	6.84242e-06	0.846751
F_31_to_35_years	M_46_to_50_years	464	145	2917.12	1030.45	0	0	0	0.844866	0	6.84242e-06	0.846751
F_31_to_35_years	M_51_to_55_years	464	115	2917.12	705.13	0	0	0	0.844866	0	6.84242e-06	0.846751
F_31_to_35_years	M_56_to_60_years	464	99	2917.12	449.346	0	0	0	0.844866	0	6.84242e-06	0.846751
F_31_to_35_years	M_61_to_64_years	464	38	2917.12	209.875	0	0	0	0.844866	0	6.84242e-06	0.846751
F_36_to_40_years	F_16_to_20_years	465	101	3120.22	603.544	-	-	-	-	-	-	-
F_36_to_40_years	F_21_to_25_years	465	208	3120.22	958.539	-	-	-	-	-	-	-
F_36_to_40_years	F_26_to_30_years	465	330	3120.22	2113.44	-	-	-	-	-	-	-
F_36_to_40_years	F_31_to_35_years	465	464	3120.22	2917.12	-	-	-	-	-	-	-
F_36_to_40_years	F_36_to_40_years	465	465	3120.22	3120.22	-	-	-	-	-	-	-
F_36_to_40_years	F_41_to_45_years	465	445	3120.22	2856.58	-	-	-	-	-	-	-
F_36_to_40_years	F_46_to_50_years	465	279	3120.22	2149.81	-	-	-	-	-	-	-
F_36_to_40_years	F_51_to_55_years	465	213	3120.22	1535.91	-	-	-	-	-	-	-
F_36_to_40_years	F_56_to_60_years	465	163	3120.22	965.965	-	-	-	-	-	-	-
F_36_to_40_years	F_61_to_64_years	465	62	3120.22	468.404	-	-	-	-	-	-	-
F_36_to_40_years	M_16_to_20_years	465	23	3120.22	410.444	0	0	0	0.844866	0	6.84242e-06	0.846751
F_36_to_40_years	M_21_to_25_years	465	43	3120.22	528.035	0	0	0	0.844866	0	6.84242e-06	0.846751
F_36_to_40_years	M_26_to_30_years	465	72	3120.22	1134.86	0	0	0	0.844866	0	6.84242e-06	0.846751
F_36_to_40_years	M_31_to_35_years	465	158	3120.22	1709.97	0	0	0	0.844866	0	6.84242e-06	0.846751
F_36_to_40_years	M_36_to_40_years	465	216	3120.22	1853.73	0	0	0	0.844866	0	6.84242e-06	0.846751
F_36_to_40_years	M_46_to_50_years	465	145	3120.22	1030.45	0	0	0	0.844866	0	6.84242e-06	0.846751
F_36_to_40_years	M_61_to_64_years	465	38	3120.22	209.875	0	0	0	0.844866	0	6.84242e-06	0.846751
F_41_to_45_years	F_16_to_20_years	445	101	2856.58	603.544	-	-	-	-	-	-	-
F_41_to_45_years	F_21_to_25_years	445	208	2856.58	958.539	-	-	-	-	-	-	-
F_41_to_45_years	F_26_to_30_years	445	330	2856.58	2113.44	-	-	-	-	-	-	-
F_41_to_45_years	F_31_to_35_years	445	464	2856.58	2917.12	-	-	-	-	-	-	-
F_41_to_45_years	F_36_to_40_years	445	465	2856.58	3120.22	-	-	-	-	-	-	-
F_41_to_45_years	F_41_to_45_years	445	445	2856.58	2856.58	-	-	-	-	-	-	-
F_41_to_45_years	F_46_to_50_years	445	279	2856.58	2149.81	-	-	-	-	-	-	-
F_41_to_45_years	F_51_to_55_years	445	213	2856.58	1535.91	-	-	-	-	-	-	-
F_41_to_45_years	F_56_to_60_years	445	163	2856.58	965.965	-	-	-	-	-	-	-
F_41_to_45_years	F_61_to_64_years	445	62	2856.58	468.404	-	-	-	-	-	-	-
F_41_to_45_years	M_16_to_20_years	445	23	2856.58	410.444	0	0	0	0.844866	0	6.84242e-06	0.846751
F_41_to_45_years	M_21_to_25_years	445	43	2856.58	528.035	0	0	0	0.844866	0	6.84242e-06	0.846751
F_41_to_45_years	M_31_to_35_years	445	158	2856.58	1709.97	0	0	0	0.844866	0	6.84242e-06	0.846751
F_41_to_45_years	M_61_to_64_years	445	38	2856.58	209.875	0	0	0	0.844866	0	6.84242e-06	0.846751
F_46_to_50_years	F_16_to_20_years	279	101	2149.81	603.544	-	-	-	-	-	-	-
F_46_to_50_years	F_21_to_25_years	279	208	2149.81	958.539	-	-	-	-	-	-	-
F_46_to_50_years	F_26_to_30_years	279	330	2149.81	2113.44	-	-	-	-	-	-	-
F_46_to_50_years	F_31_to_35_years	279	464	2149.81	2917.12	-	-	-	-	-	-	-
F_46_to_50_years	F_36_to_40_years	279	465	2149.81	3120.22	-	-	-	-	-	-	-
F_46_to_50_years	F_41_to_45_years	279	445	2149.81	2856.58	-	-	-	-	-	-	-
F_46_to_50_years	F_46_to_50_years	279	279	2149.81	2149.81	-	-	-	-	-	-	-
F_46_to_50_years	F_51_to_55_years	279	213	2149.81	1535.91	-	-	-	-	-	-	-
F_46_to_50_years	F_56_to_60_years	279	163	2149.81	965.965	-	-	-	-	-	-	-
F_46_to_50_years	F_61_to_64_years	279	62	2149.81	468.404	-	-	-	-	-	-	-
F_46_to_50_years	M_21_to_25_years	279	43	2149.81	528.035	0	0	0	0.844866	0	6.84242e-06	0.846751
F_46_to_50_years	M_26_to_30_years	279	72	2149.81	1134.86	0	0	0	0.844866	0	6.84242e-06	0.846751
F_46_to_50_years	M_31_to_35_years	279	158	2149.81	1709.97	0	0	0	0.844866	0	6.84242e-06	0.846751
F_46_to_50_years	M_36_to_40_years	279	216	2149.81	1853.73	0	0	0	0.844866	0	6.84242e-06	0.846751
F_46_to_50_years	M_41_to_45_years	279	193	2149.81	1499.86	0	0	0	0.844866	0	6.84242e-06	0.846751
F_46_to_50_years	M_46_to_50_years	279	145	2149.81	1030.45	0	0	0	0.844866	0	6.84242e-06	0.846751
F_46_to_50_years	M_61_to_64_years	279	38	2149.81	209.875	0	0	0	0.844866	0	6.84242e-06	0.846751
F_51_to_55_years	F_16_to_20_years	213	101	1535.91	603.544	-	-	-	-	-	-	-
F_51_to_55_years	F_21_to_25_years	213	208	1535.91	958.539	-	-	-	-	-	-	-
F_51_to_55_years	F_26_to_30_years	213	330	1535.91	2113.44	-	-	-	-	-	-	-
F_51_to_55_years	F_31_to_35_years	213	464	1535.91	2917.12	-	-	-	-	-	-	-
F_51_to_55_years	F_36_to_40_years	213	465	1535.91	3120.22	-	-	-	-	-	-	-
F_51_to_55_years	F_41_to_45_years	213	445	1535.91	2856.58	-	-	-	-	-	-	-
F_51_to_55_years	F_46_to_50_years	213	279	1535.91	2149.81	-	-	-	-	-	-	-
F_51_to_55_years	F_51_to_55_years	213	213	1535.91	1535.91	-	-	-	-	-	-	-
F_51_to_55_years	F_56_to_60_years	213	163	1535.91	965.965	-	-	-	-	-	-	-
F_51_to_55_years	F_61_to_64_years	213	62	1535.91	468.404	-	-	-	-	-	-	-
F_51_to_55_years	M_16_to_20_years	213	23	1535.91	410.444	0	0	0	0.844866	0	6.84242e-06	0.846751
F_51_to_55_years	M_21_to_25_years	213	43	1535.91	528.035	0	0	0	0.844866	0	6.84242e-06	0.846751
F_51_to_55_years	M_26_to_30_years	213	72	1535.91	1134.86	0	0	0	0.844866	0	6.84242e-06	0.846751
F_51_to_55_years	M_31_to_35_years	213	158	1535.91	1709.97	0	0	0	0.844866	0	6.84242e-06	0.846751
F_51_to_55_years	M_36_to_40_years	213	216	1535.91	1853.73	0	0	0	0.844866	0	6.84242e-06	0.846751
F_51_to_55_years	M_41_to_45_years	213	193	1535.91	1499.86	0	0	0	0.844866	0	6.84242e-06	0.846751
F_51_to_55_years	M_46_to_50_years	213	145	1535.91	1030.45	0	0	0	0.844866	0	6.84242e-06	0.846751
F_51_to_55_years	M_56_to_60_years	213	99	1535.91	449.346	0	0	0	0.844866	0	6.84242e-06	0.846751
F_51_to_55_years	M_61_to_64_years	213	38	1535.91	209.875	0	0	0	0.844866	0	6.84242e-06	0.846751
F_56_to_60_years	F_16_to_20_years	163	101	965.965	603.544	-	-	-	-	-	-	-
F_56_to_60_years	F_21_to_25_years	163	208	965.965	958.539	-	-	-	-	-	-	-
F_56_to_60_years	F_26_to_30_years	163	330	965.965	2113.44	-	-	-	-	-	-	-
F_56_to_60_years	F_31_to_35_years	163	464	965.965	2917.12	-	-	-	-	-	-	-
F_56_to_60_years	F_36_to_40_years	163	465	965.965	3120.22	-	-	-	-	-	-	-
F_56_to_60_years	F_41_to_45_years	163	445	965.965	2856.58	-	-	-	-	-	-	-
F_56_to_60_years	F_46_to_50_years	163	279	965.965	2149.81	-	-	-	-	-	-	-
F_56_to_60_years	F_51_to_55_years	163	213	965.965	1535.91	-	-	-	-	-	-	-
F_56_to_60_years	F_56_to_60_years	163	163	965.965	965.965	-	-	-	-	-	-	-
F_56_to_60_years	F_61_to_64_years	163	62	965.965	468.404	-	-	-	-	-	-	-
F_56_to_60_years	M_16_to_20_years	163	23	965.965	410.444	0	0	0	0.844866	0	6.84242e-06	0.846751
F_56_to_60_years	M_21_to_25_years	163	43	965.965	528.035	0	0	0	0.844866	0	6.84242e-06	0.846751
F_56_to_60_years	M_31_to_35_years	163	158	965.965	1709.97	0	0	0	0.844866	0	6.84242e-06	0.846751
F_56_to_60_years	M_41_to_45_years	163	193	965.965	1499.86	0	0	0	0.844866	0	6.84242e-06	0.846751
F_56_to_60_years	M_51_to_55_years	163	115	965.965	705.13	0	0	0	0.844866	0	6.84242e-06	0.846751
F_56_to_60_years	M_56_to_60_years	163	99	965.965	449.346	0	0	0	0.844866	0	6.84242e-06	0.846751
F_56_to_60_years	M_61_to_64_years	163	38	965.965	209.875	0	0	0	0.844866	0	6.84242e-06	0.846751
F_61_to_64_years	F_16_to_20_years	62	101	468.404	603.544	-	-	-	-	-	-	-
F_61_to_64_years	F_21_to_25_years	62	208	468.404	958.539	-	-	-	-	-	-	-
F_61_to_64_years	F_26_to_30_years	62	330	468.404	2113.44	-	-	-	-	-	-	-
F_61_to_64_years	F_31_to_35_years	62	464	468.404	2917.12	-	-	-	-	-	-	-
F_61_to_64_years	F_36_to_40_years	62	465	468.404	3120.22	-	-	-	-	-	-	-
F_61_to_64_years	F_41_to_45_years	62	445	468.404	2856.58	-	-	-	-	-	-	-
F_61_to_64_years	F_46_to_50_years	62	279	468.404	2149.81	-	-	-	-	-	-	-
F_61_to_64_years	F_51_to_55_years	62	213	468.404	1535.91	-	-	-	-	-	-	-
F_61_to_64_years	F_56_to_60_years	62	163	468.404	965.965	-	-	-	-	-	-	-
F_61_to_64_years	F_61_to_64_years	62	62	468.404	468.404	-	-	-	-	-	-	-
F_61_to_64_years	M_16_to_20_years	62	23	468.404	410.444	0	0	0	0.844866	0	6.84242e-06	0.846751
F_61_to_64_years	M_21_to_25_years	62	43	468.404	528.035	0	0	0	0.844866	0	6.84242e-06	0.846751
F_61_to_64_years	M_26_to_30_years	62	72	468.404	1134.86	0	0	0	0.844866	0	6.84242e-06	0.846751
F_61_to_64_years	M_31_to_35_years	62	158	468.404	1709.97	0	0	0	0.844866	0	6.84242e-06	0.846751
F_61_to_64_years	M_36_to_40_years	62	216	468.404	1853.73	0	0	0	0.844866	0	6.84242e-06	0.846751
F_61_to_64_years	M_41_to_45_years	62	193	468.404	1499.86	0	0	0	0.844866	0	6.84242e-06	0.846751
F_61_to_64_years	M_46_to_50_years	62	145	468.404	1030.45	0	0	0	0.844866	0	6.84242e-06	0.846751
F_61_to_64_years	M_51_to_55_years	62	115	468.404	705.13	0	0	0	0.844866	0	6.84242e-06	0.846751
F_61_to_64_years	M_56_to_60_years	62	99	468.404	449.346	0	0	0	0.844866	0	6.84242e-06	0.846751
F_61_to_64_years	M_61_to_64_years	62	38	468.404	209.875	0	0	0	0.844866	0	6.84242e-06	0.846751
M_16_to_20_years	F_16_to_20_years	23	101	410.444	603.544	0	0	0	0.844866	0	6.84242e-06	0.846751
M_16_to_20_years	F_21_to_25_years	23	208	410.444	958.539	0	0	0	0.844866	0	6.84242e-06	0.846751
M_16_to_20_years	F_26_to_30_years	23	330	410.444	2113.44	0	0	0	0.844866	0	6.84242e-06	0.846751
M_16_to_20_years	F_31_to_35_years	23	464	410.444	2917.12	0	0	0	0.844866	0	6.84242e-06	0.846751
M_16_to_20_years	F_36_to_40_years	23	465	410.444	3120.22	0	0	0	0.844866	0	6.84242e-06	0.846751
M_16_to_20_years	F_41_to_45_years	23	445	410.444	2856.58	0	0	0	0.844866	0	6.84242e-06	0.846751
M_16_to_20_years	F_46_to_50_years	23	279	410.444	2149.81	0	0	0	0.844866	0	6.84242e-06	0.846751
M_16_to_20_years	F_51_to_55_years	23	213	410.444	1535.91	0	0	0	0.844866	0	6.84242e-06	0.846751
M_16_to_20_years	F_56_to_60_years	23	163	410.444	965.965	0	0	0	0.844866	0	6.84242e-06	0.846751
M_16_to_20_years	F_61_to_64_years	23	62	410.444	468.404	0	0	0	0.844866	0	6.84242e-06	0.846751
M_16_to_20_years	M_16_to_20_years	23	23	410.444	410.444	-	-	-	-	-	-	-
M_16_to_20_years	M_21_to_25_years	23	43	410.444	528.035	-	-	-	-	-	-	-
M_16_to_20_years	M_26_to_30_years	23	72	410.444	1134.86	-	-	-	-	-	-	-
M_16_to_20_years	M_31_to_35_years	23	158	410.444	1709.97	-	-	-	-	-	-	-
M_16_to_20_years	M_36_to_40_years	23	216	410.444	1853.73	-	-	-	-	-	-	-
M_16_to_20_years	M_41_to_45_years	23	193	410.444	1499.86	-	-	-	-	-	-	-
M_16_to_20_years	M_46_to_50_years	23	145	410.444	1030.45	-	-	-	-	-	-	-
M_16_to_20_years	M_51_to_55_years	23	115	410.444	705.13	-	-	-	-	-	-	-
M_16_to_20_years	M_56_to_60_years	23	99	410.444	449.346	-	-	-	-	-	-	-
M_16_to_20_years	M_61_to_64_years	23	38	410.444	209.875	-	-	-	-	-	-	-
M_21_to_25_years	F_16_to_20_years	43	101	528.035	603.544	0	0	0	0.844866	0	6.84242e-06	0.846751
M_21_to_25_years	F_21_to_25_years	43	208	528.035	958.539	0	0	0	0.844866	0	6.84242e-06	0.846751
M_21_to_25_years	F_26_to_30_years	43	330	528.035	2113.44	0	0	0	0.844866	0	6.84242e-06	0.846751
M_21_to_25_years	F_31_to_35_years	43	464	528.035	2917.12	0	0	0	0.844866	0	6.84242e-06	0.846751
M_21_to_25_years	F_36_to_40_years	43	465	528.035	3120.22	0	0	0	0.844866	0	6.84242e-06	0.846751
M_21_to_25_years	F_41_to_45_years	43	445	528.035	2856.58	0	0	0	0.844866	0	6.84242e-06	0.846751
M_21_to_25_years	F_46_to_50_years	43	279	528.035	2149.81	0	0	0	0.844866	0	6.84242e-06	0.846751
M_21_to_25_years	F_51_to_55_years	43	213	528.035	1535.91	0	0	0	0.844866	0	6.84242e-06	0.846751
M_21_to_25_years	F_56_to_60_years	43	163	528.035	965.965	0	0	0	0.844866	0	6.84242e-06	0.846751
M_21_to_25_years	F_61_to_64_years	43	62	528.035	468.404	0	0	0	0.844866	0	6.84242e-06	0.846751
M_21_to_25_years	M_16_to_20_years	43	23	528.035	410.444	-	-	-	-	-	-	-
M_21_to_25_years	M_21_to_25_years	43	43	528.035	528.035	-	-	-	-	-	-	-
M_21_to_25_years	M_26_to_30_years	43	72	528.035	1134.86	-	-	-	-	-	-	-
M_21_to_25_years	M_31_to_35_years	43	158	528.035	1709.97	-	-	-	-	-	-	-
M_21_to_25_years	M_36_to_40_years	43	216	528.035	1853.73	-	-	-	-	-	-	-
M_21_to_25_years	M_41_to_45_years	43	193	528.035	1499.86	-	-	-	-	-	-	-
M_21_to_25_years	M_46_to_50_years	43	145	528.035	1030.45	-	-	-	-	-	-	-
M_21_to_25_years	M_51_to_55_years	43	115	528.035	705.13	-	-	-	-	-	-	-
M_21_to_25_years	M_56_to_60_years	43	99	528.035	449.346	-	-	-	-	-	-	-
M_21_to_25_years	M_61_to_64_years	43	38	528.035	209.875	-	-	-	-	-	-	-
M_26_to_30_years	F_16_to_20_years	72	101	1134.86	603.544	0	0	0	0.844866	0	6.84242e-06	0.846751
M_26_to_30_years	F_21_to_25_years	72	208	1134.86	958.539	0	0	0	0.844866	0	6.84242e-06	0.846751
M_26_to_30_years	F_36_to_40_years	72	465	1134.86	3120.22	0	0	0	0.844866	0	6.84242e-06	0.846751
M_26_to_30_years	F_41_to_45_years	72	445	1134.86	2856.58	0	0	0	0.844866	0	6.84242e-06	0.846751
M_26_to_30_years	F_46_to_50_years	72	279	1134.86	2149.81	0	0	0	0.844866	0	6.84242e-06	0.846751
M_26_to_30_years	F_51_to_55_years	72	213	1134.86	1535.91	0	0	0	0.844866	0	6.84242e-06	0.846751
M_26_to_30_years	F_56_to_60_years	72	163	1134.86	965.965	0	0	0	0.844866	0	6.84242e-06	0.846751
M_26_to_30_years	F_61_to_64_years	72	62	1134.86	468.404	0	0	0	0.844866	0	6.84242e-06	0.846751
M_26_to_30_years	M_16_to_20_years	72	23	1134.86	410.444	-	-	-	-	-	-	-
M_26_to_30_years	M_21_to_25_years	72	43	1134.86	528.035	-	-	-	-	-	-	-
M_26_to_30_years	M_26_to_30_years	72	72	1134.86	1134.86	-	-	-	-	-	-	-
M_26_to_30_years	M_31_to_35_years	72	158	1134.86	1709.97	-	-	-	-	-	-	-
M_26_to_30_years	M_36_to_40_years	72	216	1134.86	1853.73	-	-	-	-	-	-	-
M_26_to_30_years	M_41_to_45_years	72	193	1134.86	1499.86	-	-	-	-	-	-	-
M_26_to_30_years	M_46_to_50_years	72	145	1134.86	1030.45	-	-	-	-	-	-	-
M_26_to_30_years	M_51_to_55_years	72	115	1134.86	705.13	-	-	-	-	-	-	-
M_26_to_30_years	M_56_to_60_years	72	99	1134.86	449.346	-	-	-	-	-	-	-
M_26_to_30_years	M_61_to_64_years	72	38	1134.86	209.875	-	-	-	-	-	-	-
M_31_to_35_years	F_16_to_20_years	158	101	1709.97	603.544	0	0	0	0.844866	0	6.84242e-06	0.846751
M_31_to_35_years	F_41_to_45_years	158	445	1709.97	2856.58	0	0	0	0.844866	0	6.84242e-06	0.846751
M_31_to_35_years	F_46_to_50_years	158	279	1709.97	2149.81	0	0	0	0.844866	0	6.84242e-06	0.846751
M_31_to_35_years	F_51_to_55_years	158	213	1709.97	1535.91	0	0	0	0.844866	0	6.84242e-06	0.846751
M_31_to_35_years	F_56_to_60_years	158	163	1709.97	965.965	0	0	0	0.844866	0	6.84242e-06	0.846751
M_31_to_35_years	F_61_to_64_years	158	62	1709.97	468.404	0	0	0	0.844866	0	6.84242e-06	0.846751
M_31_to_35_years	M_16_to_20_years	158	23	1709.97	410.444	-	-	-	-	-	-	-
M_31_to_35_years	M_21_to_25_years	158	43	1709.97	528.035	-	-	-	-	-	-	-
M_31_to_35_years	M_26_to_30_years	158	72	1709.97	1134.86	-	-	-	-	-	-	-
M_31_to_35_years	M_31_to_35_years	158	158	1709.97	1709.97	-	-	-	-	-	-	-
M_31_to_35_years	M_36_to_40_years	158	216	1709.97	1853.73	-	-	-	-	-	-	-
M_31_to_35_years	M_41_to_45_years	158	193	1709.97	1499.86	-	-	-	-	-	-	-
M_31_to_35_years	M_46_to_50_years	158	145	1709.97	1030.45	-	-	-	-	-	-	-
M_31_to_35_years	M_51_to_55_years	158	115	1709.97	705.13	-	-	-	-	-	-	-
M_31_to_35_years	M_56_to_60_years	158	99	1709.97	449.346	-	-	-	-	-	-	-
M_31_to_35_years	M_61_to_64_years	158	38	1709.97	209.875	-	-	-	-	-	-	-
M_36_to_40_years	F_16_to_20_years	216	101	1853.73	603.544	0	0	0	0.844866	0	6.84242e-06	0.846751
M_36_to_40_years	F_21_to_25_years	216	208	1853.73	958.539	0	0	0	0.844866	0	6.84242e-06	0.846751
M_36_to_40_years	F_36_to_40_years	216	465	1853.73	3120.22	0	0	0	0.844866	0	6.84242e-06	0.846751
M_36_to_40_years	F_46_to_50_years	216	279	1853.73	2149.81	0	0	0	0.844866	0	6.84242e-06	0.846751
M_36_to_40_years	F_51_to_55_years	216	213	1853.73	1535.91	0	0	0	0.844866	0	6.84242e-06	0.846751
M_36_to_40_years	F_56_to_60_years	216	163	1853.73	965.965	0	0	0	0.844866	0	6.84242e-06	0.846751
M_36_to_40_years	F_61_to_64_years	216	62	1853.73	468.404	0	0	0	0.844866	0	6.84242e-06	0.846751
M_36_to_40_years	M_16_to_20_years	216	23	1853.73	410.444	-	-	-	-	-	-	-
M_36_to_40_years	M_21_to_25_years	216	43	1853.73	528.035	-	-	-	-	-	-	-
M_36_to_40_years	M_26_to_30_years	216	72	1853.73	1134.86	-	-	-	-	-	-	-
M_36_to_40_years	M_31_to_35_years	216	158	1853.73	1709.97	-	-	-	-	-	-	-
M_36_to_40_years	M_36_to_40_years	216	216	1853.73	1853.73	-	-	-	-	-	-	-
M_36_to_40_years	M_41_to_45_years	216	193	1853.73	1499.86	-	-	-	-	-	-	-
M_36_to_40_years	M_46_to_50_years	216	145	1853.73	1030.45	-	-	-	-	-	-	-
M_36_to_40_years	M_51_to_55_years	216	115	1853.73	705.13	-	-	-	-	-	-	-
M_36_to_40_years	M_56_to_60_years	216	99	1853.73	449.346	-	-	-	-	-	-	-
M_36_to_40_years	M_61_to_64_years	216	38	1853.73	209.875	-	-	-	-	-	-	-
M_41_to_45_years	F_26_to_30_years	193	330	1499.86	2113.44	0	0	0	0.844866	0	6.84242e-06	0.846751
M_41_to_45_years	F_51_to_55_years	193	213	1499.86	1535.91	0	0	0	0.844866	0	6.84242e-06	0.846751
M_41_to_45_years	F_61_to_64_years	193	62	1499.86	468.404	0	0	0	0.844866	0	6.84242e-06	0.846751
M_41_to_45_years	M_16_to_20_years	193	23	1499.86	410.444	-	-	-	-	-	-	-
M_41_to_45_years	M_21_to_25_years	193	43	1499.86	528.035	-	-	-	-	-	-	-
M_41_to_45_years	M_26_to_30_years	193	72	1499.86	1134.86	-	-	-	-	-	-	-
M_41_to_45_years	M_31_to_35_years	193	158	1499.86	1709.97	-	-	-	-	-	-	-
M_41_to_45_years	M_36_to_40_years	193	216	1499.86	1853.73	-	-	-	-	-	-	-
M_41_to_45_years	M_41_to_45_years	193	193	1499.86	1499.86	-	-	-	-	-	-	-
M_41_to_45_years	M_46_to_50_years	193	145	1499.86	1030.45	-	-	-	-	-	-	-
M_41_to_45_years	M_51_to_55_years	193	115	1499.86	705.13	-	-	-	-	-	-	-
M_41_to_45_years	M_56_to_60_years	193	99	1499.86	449.346	-	-	-	-	-	-	-
M_41_to_45_years	M_61_to_64_years	193	38	1499.86	209.875	-	-	-	-	-	-	-
M_46_to_50_years	F_16_to_20_years	145	101	1030.45	603.544	0	0	0	0.844866	0	6.84242e-06	0.846751
M_46_to_50_years	F_21_to_25_years	145	208	1030.45	958.539	0	0	0	0.844866	0	6.84242e-06	0.846751
M_46_to_50_years	F_26_to_30_years	145	330	1030.45	2113.44	0	0	0	0.844866	0	6.84242e-06	0.846751
M_46_to_50_years	F_31_to_35_years	145	464	1030.45	2917.12	0	0	0	0.844866	0	6.84242e-06	0.846751
M_46_to_50_years	F_51_to_55_years	145	213	1030.45	1535.91	0	0	0	0.844866	0	6.84242e-06	0.846751
M_46_to_50_years	F_56_to_60_years	145	163	1030.45	965.965	0	0	0	0.844866	0	6.84242e-06	0.846751
M_46_to_50_years	F_61_to_64_years	145	62	1030.45	468.404	0	0	0	0.844866	0	6.84242e-06	0.846751
M_46_to_50_years	M_16_to_20_years	145	23	1030.45	410.444	-	-	-	-	-	-	-
M_46_to_50_years	M_21_to_25_years	145	43	1030.45	528.035	-	-	-	-	-	-	-
M_46_to_50_years	M_26_to_30_years	145	72	1030.45	1134.86	-	-	-	-	-	-	-
M_46_to_50_years	M_31_to_35_years	145	158	1030.45	1709.97	-	-	-	-	-	-	-
M_46_to_50_years	M_36_to_40_years	145	216	1030.45	1853.73	-	-	-	-	-	-	-
M_46_to_50_years	M_41_to_45_years	145	193	1030.45	1499.86	-	-	-	-	-	-	-
M_46_to_50_years	M_46_to_50_years	145	145	1030.45	1030.45	-	-	-	-	-	-	-
M_46_to_50_years	M_51_to_55_years	145	115	1030.45	705.13	-	-	-	-	-	-	-
M_46_to_50_years	M_56_to_60_years	145	99	1030.45	449.346	-	-	-	-	-	-	-
M_46_to_50_years	M_61_to_64_years	145	38	1030.45	209.875	-	-	-	-	-	-	-
M_51_to_55_years	F_16_to_20_years	115	101	705.13	603.544	0	0	0	0.844866	0	6.84242e-06	0.846751
M_51_to_55_years	F_26_to_30_years	115	330	705.13	2113.44	0	0	0	0.844866	0	6.84242e-06	0.846751
M_51_to_55_years	F_31_to_35_years	115	464	705.13	2917.12	0	0	0	0.844866	0	6.84242e-06	0.846751
M_51_to_55_years	F_36_to_40_years	115	465	705.13	3120.22	0	0	0	0.844866	0	6.84242e-06	0.846751
M_51_to_55_years	F_51_to_55_years	115	213	705.13	1535.91	0	0	0	0.844866	0	6.84242e-06	0.846751
M_51_to_55_years	F_56_to_60_years	115	163	705.13	965.965	0	0	0	0.844866	0	6.84242e-06	0.846751
M_51_to_55_years	F_61_to_64_years	115	62	705.13	468.404	0	0	0	0.844866	0	6.84242e-06	0.846751
M_51_to_55_years	M_16_to_20_years	115	23	705.13	410.444	-	-	-	-	-	-	-
M_51_to_55_years	M_21_to_25_years	115	43	705.13	528.035	-	-	-	-	-	-	-
M_51_to_55_years	M_26_to_30_years	115	72	705.13	1134.86	-	-	-	-	-	-	-
M_51_to_55_years	M_31_to_35_years	115	158	705.13	1709.97	-	-	-	-	-	-	-
M_51_to_55_years	M_36_to_40_years	115	216	705.13	1853.73	-	-	-	-	-	-	-
M_51_to_55_years	M_41_to_45_years	115	193	705.13	1499.86	-	-	-	-	-	-	-
M_51_to_55_years	M_46_to_50_years	115	145	705.13	1030.45	-	-	-	-	-	-	-
M_51_to_55_years	M_51_to_55_years	115	115	705.13	705.13	-	-	-	-	-	-	-
M_51_to_55_years	M_56_to_60_years	115	99	705.13	449.346	-	-	-	-	-	-	-
M_51_to_55_years	M_61_to_64_years	115	38	705.13	209.875	-	-	-	-	-	-	-
M_56_to_60_years	F_16_to_20_years	99	101	449.346	603.544	0	0	0	0.844866	0	6.84242e-06	0.846751
M_56_to_60_years	F_21_to_25_years	99	208	449.346	958.539	0	0	0	0.844866	0	6.84242e-06	0.846751
M_56_to_60_years	F_26_to_30_years	99	330	449.346	2113.44	0	0	0	0.844866	0	6.84242e-06	0.846751
M_56_to_60_years	F_31_to_35_years	99	464	449.346	2917.12	0	0	0	0.844866	0	6.84242e-06	0.846751
M_56_to_60_years	F_36_to_40_years	99	465	449.346	3120.22	0	0	0	0.844866	0	6.84242e-06	0.846751
M_56_to_60_years	F_61_to_64_years	99	62	449.346	468.404	0	0	0	0.844866	0	6.84242e-06	0.846751
M_56_to_60_years	M_16_to_20_years	99	23	449.346	410.444	-	-	-	-	-	-	-
M_56_to_60_years	M_21_to_25_years	99	43	449.346	528.035	-	-	-	-	-	-	-
M_56_to_60_years	M_26_to_30_years	99	72	449.346	1134.86	-	-	-	-	-	-	-
M_56_to_60_years	M_31_to_35_years	99	158	449.346	1709.97	-	-	-	-	-	-	-
M_56_to_60_years	M_36_to_40_years	99	216	449.346	1853.73	-	-	-	-	-	-	-
M_56_to_60_years	M_41_to_45_years	99	193	449.346	1499.86	-	-	-	-	-	-	-
M_56_to_60_years	M_46_to_50_years	99	145	449.346	1030.45	-	-	-	-	-	-	-
M_56_to_60_years	M_51_to_55_years	99	115	449.346	705.13	-	-	-	-	-	-	-
M_56_to_60_years	M_56_to_60_years	99	99	449.346	449.346	-	-	-	-	-	-	-
M_56_to_60_years	M_61_to_64_years	99	38	449.346	209.875	-	-	-	-	-	-	-
M_61_to_64_years	F_16_to_20_years	38	101	209.875	603.544	0	0	0	0.844866	0	6.84242e-06	0.846751
M_61_to_64_years	F_21_to_25_years	38	208	209.875	958.539	0	0	0	0.844866	0	6.84242e-06	0.846751
M_61_to_64_years	F_26_to_30_years	38	330	209.875	2113.44	0	0	0	0.844866	0	6.84242e-06	0.846751
M_61_to_64_years	F_31_to_35_years	38	464	209.875	2917.12	0	0	0	0.844866	0	6.84242e-06	0.846751
M_61_to_64_years	F_36_to_40_years	38	465	209.875	3120.22	0	0	0	0.844866	0	6.84242e-06	0.846751
M_61_to_64_years	F_41_to_45_years	38	445	209.875	2856.58	0	0	0	0.844866	0	6.84242e-06	0.846751
M_61_to_64_years	F_61_to_64_years	38	62	209.875	468.404	0	0	0	0.844866	0	6.84242e-06	0.846751
M_61_to_64_years	M_16_to_20_years	38	23	209.875	410.444	-	-	-	-	-	-	-
M_61_to_64_years	M_21_to_25_years	38	43	209.875	528.035	-	-	-	-	-	-	-
M_61_to_64_years	M_26_to_30_years	38	72	209.875	1134.86	-	-	-	-	-	-	-
M_61_to_64_years	M_31_to_35_years	38	158	209.875	1709.97	-	-	-	-	-	-	-
M_61_to_64_years	M_36_to_40_years	38	216	209.875	1853.73	-	-	-	-	-	-	-
M_61_to_64_years	M_41_to_45_years	38	193	209.875	1499.86	-	-	-	-	-	-	-
M_61_to_64_years	M_46_to_50_years	38	145	209.875	1030.45	-	-	-	-	-	-	-
M_61_to_64_years	M_51_to_55_years	38	115	209.875	705.13	-	-	-	-	-	-	-
M_61_to_64_years	M_56_to_60_years	38	99	209.875	449.346	-	-	-	-	-	-	-
M_61_to_64_years	M_61_to_64_years	38	38	209.875	209.875	-	-	-	-	-	-	-
Notes:
1. Estimated proportions of HIV-1 transmissions in the trial population were adjusted for differential sampling by gender and 5-year age group
2. Simultaneous confidence intervals at the 5% significance level were estimated with the Goodman method as described in the materials and methods
3. M, denotes males and F, represents females

## Sheet: Supplementary file 1 Table 1H
Supplementary file 1 Table 1H. Proportions of inferred HIV-1 transmissions among trial participants by gender
Gender of transmitter (Group 1)	Gender of recipient (Group 2)	Number of individuals sampled from group 1	Number of individuals sampled from group 2	Estimated number of individuals with HIV in group 1	Estimated number of individuals with HIV in group 2	Observed number of highly supported probable transmission pairs in the deep-sequenced sample (n = 82)	Unadjusted proportion of highly supported probable transmission pairs in the deep-sequenced sample (n = 82)	95% Lower confidence bound for unadjusted proportion (Goodman method)	95% Upper confidence bound for unadjusted proportion (Goodman method)	Estimated proportion of HIV transmissions in the trial population	95% Lower confidence bound for estimated proportion of HIV transmissions in trial population (Goodman method)	95% Upper confidence bound for estimated proportion of HIV transmissions in trial population (Goodman method)
Male	Female	1102	2730	9631.05	17815.3	45	0.54878	0.397692	0.691381	0.54878	0.391974	0.696777
Female	Male	2730	1102	17815.3	9631.05	37	0.45122	0.308619	0.602308	0.45122	0.303223	0.608026
Notes:
1. Estimated proportions of HIV-1 transmissions in the trial population were adjusted for differential sampling by gender
2. Simultaneous confidence intervals at the 5% significance level were estimated with the Goodman method as described in the materials and methods

## Sheet: Supplementary file 1 Table 1I
Supplementary file 1 Table 1I. Observed and predicted proportions of HIV-1 transmissions in the trial population by community
Source community (Group 1)	Recipient community (Group 2)	Number of individuals sampled from group 1	Number of individuals sampled from group 2	Estimated number of individuals with HIV in group 1	Estimated number of individuals with HIV in group 2	Observed number of highly supported probable transmission pairs in the deep-sequenced sample (n = 82)	Unadjusted proportion of highly supported probable transmission pairs in the deep-sequenced sample (n = 82)	95% Lower confidence bound for unadjusted proportion (Goodman method)	95% Upper confidence bound for unadjusted proportion (Goodman method)	Estimated proportion of HIV transmissions in the trial population	95% Lower confidence bound for estimated proportion of HIV transmissions in trial population (Goodman method)	95% Upper confidence bound for estimated proportion of HIV transmissions in trial population (Goodman method)
Shakawe	Shakawe	313	313	1007.32	1007.32	7	0.0853659	0.000607756	0.934745	0.0149343	6.59234e-06	0.925285
Maunatlala	Maunatlala	236	236	652.122	652.122	6	0.0731707	0.000447348	0.933004	0.00944151	9.44881e-07	0.924446
Lentsweletau	Lentsweletau	206	206	786.59	786.59	5	0.0609756	0.000311247	0.931239	0.0150374	6.74696e-06	0.925301
Mmathethe	Mmathethe	135	135	752.809	752.809	5	0.0609756	0.000311247	0.931239	0.0321516	5.71439e-05	0.927884
Gumare	Gumare	260	260	1183.25	1183.25	4	0.0487805	0.000199582	0.929449	0.0170787	1.01764e-05	0.925611
Lerala	Lerala	347	347	1414.47	1414.47	3	0.0365854	0.000112484	0.927635	0.0102677	1.46929e-06	0.924572
Mmankgodi	Mmankgodi	166	166	1106.41	1106.41	3	0.0365854	0.000112484	0.927635	0.0275324	3.87072e-05	0.927191
Ramokgonami	Ramokgonami	220	220	702.828	702.828	3	0.0365854	0.000112484	0.927635	0.00631266	3.91178e-09	0.923965
Sefophe	Sefophe	121	121	924.108	924.108	3	0.0365854	0.000112484	0.927635	0.036225	7.63583e-05	0.928491
Letlhakeng	Letlhakeng	92	92	942.393	942.393	2	0.0243902	5.00923e-05	0.925796	0.0435595	0.000117922	0.929579
Mmandunyane	Mmandunyane	56	56	550.59	550.59	2	0.0243902	5.00923e-05	0.925796	0.0403855	9.88371e-05	0.929109
Molapowabojang	Molapowabojang	60	60	1123.73	1123.73	2	0.0243902	5.00923e-05	0.925796	0.146502	0.00163089	0.943912
Nkange	Nkange	107	107	471.876	471.876	2	0.0243902	5.00923e-05	0.925796	0.00805291	3.23151e-07	0.924233
Ramokgonami	Maunatlala	220	236	702.828	652.122	2	0.0243902	5.00923e-05	0.925796	0.00362871	5.15555e-07	0.923552
Ranaka	Ranaka	34	34	519.152	519.152	2	0.0243902	5.00923e-05	0.925796	0.0985525	0.000712125	0.937449
Sefophe	Tati_siding	121	277	924.108	1669.34	2	0.0243902	5.00923e-05	0.925796	0.0189196	1.38702e-05	0.925891
Shakawe	Gumare	313	260	1007.32	1183.25	2	0.0243902	5.00923e-05	0.925796	0.00602057	5.01138e-10	0.92392
Bokaa	Bokaa	73	73	763.294	763.294	1	0.0121951	1.25483e-05	0.923932	0.0227529	2.33885e-05	0.926471
Digawana	Digawana	28	28	594.909	594.909	1	0.0121951	1.25483e-05	0.923932	0.0960567	0.000674449	0.937102
Gumare	Shakawe	260	313	1183.25	1007.32	1	0.0121951	1.25483e-05	0.923932	0.00301029	8.0627e-07	0.923456
Gweta	Gweta	131	131	647.618	647.618	1	0.0121951	1.25483e-05	0.923932	0.00505395	9.20989e-08	0.923771
Lentsweletau	Mmankgodi	206	166	786.59	1106.41	1	0.0121951	1.25483e-05	0.923932	0.00523078	6.35303e-08	0.923799
Masunga	Masunga	182	182	930.28	930.28	1	0.0121951	1.25483e-05	0.923932	0.00539373	4.1888e-08	0.923824
Masunga	Sebina	182	51	930.28	374.546	1	0.0121951	1.25483e-05	0.923932	0.00771536	2.21223e-07	0.924181
Mathangwane	Gweta	102	131	815.916	647.618	1	0.0121951	1.25483e-05	0.923932	0.00812778	3.48368e-07	0.924244
Mmadinare	Lerala	112	347	2184.11	1414.47	1	0.0121951	1.25483e-05	0.923932	0.016338	8.85106e-06	0.925499
Mmadinare	Mmadinare	112	112	2184.11	2184.11	1	0.0121951	1.25483e-05	0.923932	0.0788293	0.000442026	0.934683
Mmankgodi	Lerala	166	347	1106.41	1414.47	1	0.0121951	1.25483e-05	0.923932	0.00558406	2.2296e-08	0.923853
Mmankgodi	Maunatlala	166	236	1106.41	652.122	1	0.0121951	1.25483e-05	0.923932	0.00378532	4.5221e-07	0.923576
Mmankgodi	Mmathethe	166	135	1106.41	752.809	1	0.0121951	1.25483e-05	0.923932	0.007639	2.00836e-07	0.924169
Mmankgodi	Nata	166	59	1106.41	655.576	1	0.0121951	1.25483e-05	0.923932	0.0152215	7.02743e-06	0.925329
Mmathethe	Metsimotlhabe	135	34	752.809	1277.91	1	0.0121951	1.25483e-05	0.923932	0.0430777	0.000114917	0.929507
Nata	Gumare	59	260	655.576	1183.25	1	0.0121951	1.25483e-05	0.923932	0.0103933	1.55907e-06	0.924591
Nata	Lentsweletau	59	206	655.576	786.59	1	0.0121951	1.25483e-05	0.923932	0.00872029	5.81321e-07	0.924335
Nata	Nata	59	59	655.576	655.576	1	0.0121951	1.25483e-05	0.923932	0.025774	3.26262e-05	0.926927
Nkange	Tati_siding	107	277	471.876	1669.34	1	0.0121951	1.25483e-05	0.923932	0.00546246	3.41063e-08	0.923834
Rakops	Masunga	92	182	673.64	930.28	1	0.0121951	1.25483e-05	0.923932	0.00769239	2.14987e-07	0.924177
Rakops	Rakops	92	92	673.64	673.64	1	0.0121951	1.25483e-05	0.923932	0.011124	2.13427e-06	0.924703
Ramokgonami	Sefhare	220	24	702.828	721.311	1	0.0121951	1.25483e-05	0.923932	0.0197341	1.56861e-05	0.926015
Ramokgonami	Tati_siding	220	277	702.828	1669.34	1	0.0121951	1.25483e-05	0.923932	0.00395704	3.87523e-07	0.923602
Sefhare	Lerala	24	347	721.311	1414.47	1	0.0121951	1.25483e-05	0.923932	0.0251799	3.0689e-05	0.926838
Shakawe	Tati_siding	313	277	1007.32	1669.34	1	0.0121951	1.25483e-05	0.923932	0.00398629	3.77003e-07	0.923607
Tati_siding	Mmankgodi	277	166	1669.34	1106.41	1	0.0121951	1.25483e-05	0.923932	0.00825565	3.93625e-07	0.924264
Tsetsebjwe	Tsetsebjwe	99	99	730.907	730.907	1	0.0121951	1.25483e-05	0.923932	0.0113018	2.28788e-06	0.92473
Bokaa	Digawana	73	28	763.294	594.909	0	0	0	0.922043	0	3.14677e-06	0.922991
Bokaa	Gumare	73	260	763.294	1183.25	0	0	0	0.922043	0	3.14677e-06	0.922991
Bokaa	Gweta	73	131	763.294	647.618	0	0	0	0.922043	0	3.14677e-06	0.922991
Bokaa	Lentsweletau	73	206	763.294	786.59	0	0	0	0.922043	0	3.14677e-06	0.922991
Bokaa	Lerala	73	347	763.294	1414.47	0	0	0	0.922043	0	3.14677e-06	0.922991
Bokaa	Letlhakeng	73	92	763.294	942.393	0	0	0	0.922043	0	3.14677e-06	0.922991
Bokaa	Masunga	73	182	763.294	930.28	0	0	0	0.922043	0	3.14677e-06	0.922991
Bokaa	Mathangwane	73	102	763.294	815.916	0	0	0	0.922043	0	3.14677e-06	0.922991
Bokaa	Maunatlala	73	236	763.294	652.122	0	0	0	0.922043	0	3.14677e-06	0.922991
Bokaa	Metsimotlhabe	73	34	763.294	1277.91	0	0	0	0.922043	0	3.14677e-06	0.922991
Bokaa	Mmadinare	73	112	763.294	2184.11	0	0	0	0.922043	0	3.14677e-06	0.922991
Bokaa	Mmandunyane	73	56	763.294	550.59	0	0	0	0.922043	0	3.14677e-06	0.922991
Bokaa	Mmankgodi	73	166	763.294	1106.41	0	0	0	0.922043	0	3.14677e-06	0.922991
Bokaa	Mmathethe	73	135	763.294	752.809	0	0	0	0.922043	0	3.14677e-06	0.922991
Bokaa	Molapowabojang	73	60	763.294	1123.73	0	0	0	0.922043	0	3.14677e-06	0.922991
Bokaa	Nata	73	59	763.294	655.576	0	0	0	0.922043	0	3.14677e-06	0.922991
Bokaa	Nkange	73	107	763.294	471.876	0	0	0	0.922043	0	3.14677e-06	0.922991
Bokaa	Oodi	73	73	763.294	1191.01	0	0	0	0.922043	0	3.14677e-06	0.922991
Bokaa	Otse	73	99	763.294	906.145	0	0	0	0.922043	0	3.14677e-06	0.922991
Bokaa	Rakops	73	92	763.294	673.64	0	0	0	0.922043	0	3.14677e-06	0.922991
Bokaa	Ramokgonami	73	220	763.294	702.828	0	0	0	0.922043	0	3.14677e-06	0.922991
Bokaa	Ranaka	73	34	763.294	519.152	0	0	0	0.922043	0	3.14677e-06	0.922991
Bokaa	Sebina	73	51	763.294	374.546	0	0	0	0.922043	0	3.14677e-06	0.922991
Bokaa	Sefhare	73	24	763.294	721.311	0	0	0	0.922043	0	3.14677e-06	0.922991
Bokaa	Sefophe	73	121	763.294	924.108	0	0	0	0.922043	0	3.14677e-06	0.922991
Bokaa	Shakawe	73	313	763.294	1007.32	0	0	0	0.922043	0	3.14677e-06	0.922991
Bokaa	Shoshong	73	43	763.294	1172.14	0	0	0	0.922043	0	3.14677e-06	0.922991
Bokaa	Tati_siding	73	277	763.294	1669.34	0	0	0	0.922043	0	3.14677e-06	0.922991
Bokaa	Tsetsebjwe	73	99	763.294	730.907	0	0	0	0.922043	0	3.14677e-06	0.922991
Digawana	Bokaa	28	73	594.909	763.294	0	0	0	0.922043	0	3.14677e-06	0.922991
Digawana	Gumare	28	260	594.909	1183.25	0	0	0	0.922043	0	3.14677e-06	0.922991
Digawana	Gweta	28	131	594.909	647.618	0	0	0	0.922043	0	3.14677e-06	0.922991
Digawana	Lentsweletau	28	206	594.909	786.59	0	0	0	0.922043	0	3.14677e-06	0.922991
Digawana	Lerala	28	347	594.909	1414.47	0	0	0	0.922043	0	3.14677e-06	0.922991
Digawana	Letlhakeng	28	92	594.909	942.393	0	0	0	0.922043	0	3.14677e-06	0.922991
Digawana	Masunga	28	182	594.909	930.28	0	0	0	0.922043	0	3.14677e-06	0.922991
Digawana	Mathangwane	28	102	594.909	815.916	0	0	0	0.922043	0	3.14677e-06	0.922991
Digawana	Maunatlala	28	236	594.909	652.122	0	0	0	0.922043	0	3.14677e-06	0.922991
Digawana	Metsimotlhabe	28	34	594.909	1277.91	0	0	0	0.922043	0	3.14677e-06	0.922991
Digawana	Mmadinare	28	112	594.909	2184.11	0	0	0	0.922043	0	3.14677e-06	0.922991
Digawana	Mmandunyane	28	56	594.909	550.59	0	0	0	0.922043	0	3.14677e-06	0.922991
Digawana	Mmankgodi	28	166	594.909	1106.41	0	0	0	0.922043	0	3.14677e-06	0.922991
Digawana	Mmathethe	28	135	594.909	752.809	0	0	0	0.922043	0	3.14677e-06	0.922991
Digawana	Molapowabojang	28	60	594.909	1123.73	0	0	0	0.922043	0	3.14677e-06	0.922991
Digawana	Nata	28	59	594.909	655.576	0	0	0	0.922043	0	3.14677e-06	0.922991
Digawana	Nkange	28	107	594.909	471.876	0	0	0	0.922043	0	3.14677e-06	0.922991
Digawana	Oodi	28	73	594.909	1191.01	0	0	0	0.922043	0	3.14677e-06	0.922991
Digawana	Otse	28	99	594.909	906.145	0	0	0	0.922043	0	3.14677e-06	0.922991
Digawana	Rakops	28	92	594.909	673.64	0	0	0	0.922043	0	3.14677e-06	0.922991
Digawana	Ramokgonami	28	220	594.909	702.828	0	0	0	0.922043	0	3.14677e-06	0.922991
Digawana	Ranaka	28	34	594.909	519.152	0	0	0	0.922043	0	3.14677e-06	0.922991
Digawana	Sebina	28	51	594.909	374.546	0	0	0	0.922043	0	3.14677e-06	0.922991
Digawana	Sefhare	28	24	594.909	721.311	0	0	0	0.922043	0	3.14677e-06	0.922991
Digawana	Sefophe	28	121	594.909	924.108	0	0	0	0.922043	0	3.14677e-06	0.922991
Digawana	Shakawe	28	313	594.909	1007.32	0	0	0	0.922043	0	3.14677e-06	0.922991
Digawana	Shoshong	28	43	594.909	1172.14	0	0	0	0.922043	0	3.14677e-06	0.922991
Digawana	Tati_siding	28	277	594.909	1669.34	0	0	0	0.922043	0	3.14677e-06	0.922991
Digawana	Tsetsebjwe	28	99	594.909	730.907	0	0	0	0.922043	0	3.14677e-06	0.922991
Gumare	Bokaa	260	73	1183.25	763.294	0	0	0	0.922043	0	3.14677e-06	0.922991
Gumare	Digawana	260	28	1183.25	594.909	0	0	0	0.922043	0	3.14677e-06	0.922991
Gumare	Gweta	260	131	1183.25	647.618	0	0	0	0.922043	0	3.14677e-06	0.922991
Gumare	Lentsweletau	260	206	1183.25	786.59	0	0	0	0.922043	0	3.14677e-06	0.922991
Gumare	Lerala	260	347	1183.25	1414.47	0	0	0	0.922043	0	3.14677e-06	0.922991
Gumare	Letlhakeng	260	92	1183.25	942.393	0	0	0	0.922043	0	3.14677e-06	0.922991
Gumare	Masunga	260	182	1183.25	930.28	0	0	0	0.922043	0	3.14677e-06	0.922991
Gumare	Mathangwane	260	102	1183.25	815.916	0	0	0	0.922043	0	3.14677e-06	0.922991
Gumare	Maunatlala	260	236	1183.25	652.122	0	0	0	0.922043	0	3.14677e-06	0.922991
Gumare	Metsimotlhabe	260	34	1183.25	1277.91	0	0	0	0.922043	0	3.14677e-06	0.922991
Gumare	Mmadinare	260	112	1183.25	2184.11	0	0	0	0.922043	0	3.14677e-06	0.922991
Gumare	Mmandunyane	260	56	1183.25	550.59	0	0	0	0.922043	0	3.14677e-06	0.922991
Gumare	Mmankgodi	260	166	1183.25	1106.41	0	0	0	0.922043	0	3.14677e-06	0.922991
Gumare	Mmathethe	260	135	1183.25	752.809	0	0	0	0.922043	0	3.14677e-06	0.922991
Gumare	Molapowabojang	260	60	1183.25	1123.73	0	0	0	0.922043	0	3.14677e-06	0.922991
Gumare	Nata	260	59	1183.25	655.576	0	0	0	0.922043	0	3.14677e-06	0.922991
Gumare	Nkange	260	107	1183.25	471.876	0	0	0	0.922043	0	3.14677e-06	0.922991
Gumare	Oodi	260	73	1183.25	1191.01	0	0	0	0.922043	0	3.14677e-06	0.922991
Gumare	Otse	260	99	1183.25	906.145	0	0	0	0.922043	0	3.14677e-06	0.922991
Gumare	Rakops	260	92	1183.25	673.64	0	0	0	0.922043	0	3.14677e-06	0.922991
Gumare	Ramokgonami	260	220	1183.25	702.828	0	0	0	0.922043	0	3.14677e-06	0.922991
Gumare	Ranaka	260	34	1183.25	519.152	0	0	0	0.922043	0	3.14677e-06	0.922991
Gumare	Sebina	260	51	1183.25	374.546	0	0	0	0.922043	0	3.14677e-06	0.922991
Gumare	Sefhare	260	24	1183.25	721.311	0	0	0	0.922043	0	3.14677e-06	0.922991
Gumare	Sefophe	260	121	1183.25	924.108	0	0	0	0.922043	0	3.14677e-06	0.922991
Gumare	Shoshong	260	43	1183.25	1172.14	0	0	0	0.922043	0	3.14677e-06	0.922991
Gumare	Tati_siding	260	277	1183.25	1669.34	0	0	0	0.922043	0	3.14677e-06	0.922991
Gumare	Tsetsebjwe	260	99	1183.25	730.907	0	0	0	0.922043	0	3.14677e-06	0.922991
Gweta	Bokaa	131	73	647.618	763.294	0	0	0	0.922043	0	3.14677e-06	0.922991
Gweta	Digawana	131	28	647.618	594.909	0	0	0	0.922043	0	3.14677e-06	0.922991
Gweta	Gumare	131	260	647.618	1183.25	0	0	0	0.922043	0	3.14677e-06	0.922991
Gweta	Lentsweletau	131	206	647.618	786.59	0	0	0	0.922043	0	3.14677e-06	0.922991
Gweta	Lerala	131	347	647.618	1414.47	0	0	0	0.922043	0	3.14677e-06	0.922991
Gweta	Letlhakeng	131	92	647.618	942.393	0	0	0	0.922043	0	3.14677e-06	0.922991
Gweta	Masunga	131	182	647.618	930.28	0	0	0	0.922043	0	3.14677e-06	0.922991
Gweta	Mathangwane	131	102	647.618	815.916	0	0	0	0.922043	0	3.14677e-06	0.922991
Gweta	Maunatlala	131	236	647.618	652.122	0	0	0	0.922043	0	3.14677e-06	0.922991
Gweta	Metsimotlhabe	131	34	647.618	1277.91	0	0	0	0.922043	0	3.14677e-06	0.922991
Gweta	Mmadinare	131	112	647.618	2184.11	0	0	0	0.922043	0	3.14677e-06	0.922991
Gweta	Mmandunyane	131	56	647.618	550.59	0	0	0	0.922043	0	3.14677e-06	0.922991
Gweta	Mmankgodi	131	166	647.618	1106.41	0	0	0	0.922043	0	3.14677e-06	0.922991
Gweta	Mmathethe	131	135	647.618	752.809	0	0	0	0.922043	0	3.14677e-06	0.922991
Gweta	Molapowabojang	131	60	647.618	1123.73	0	0	0	0.922043	0	3.14677e-06	0.922991
Gweta	Nata	131	59	647.618	655.576	0	0	0	0.922043	0	3.14677e-06	0.922991
Gweta	Nkange	131	107	647.618	471.876	0	0	0	0.922043	0	3.14677e-06	0.922991
Gweta	Oodi	131	73	647.618	1191.01	0	0	0	0.922043	0	3.14677e-06	0.922991
Gweta	Otse	131	99	647.618	906.145	0	0	0	0.922043	0	3.14677e-06	0.922991
Gweta	Rakops	131	92	647.618	673.64	0	0	0	0.922043	0	3.14677e-06	0.922991
Gweta	Ramokgonami	131	220	647.618	702.828	0	0	0	0.922043	0	3.14677e-06	0.922991
Gweta	Ranaka	131	34	647.618	519.152	0	0	0	0.922043	0	3.14677e-06	0.922991
Gweta	Sebina	131	51	647.618	374.546	0	0	0	0.922043	0	3.14677e-06	0.922991
Gweta	Sefhare	131	24	647.618	721.311	0	0	0	0.922043	0	3.14677e-06	0.922991
Gweta	Sefophe	131	121	647.618	924.108	0	0	0	0.922043	0	3.14677e-06	0.922991
Gweta	Shakawe	131	313	647.618	1007.32	0	0	0	0.922043	0	3.14677e-06	0.922991
Gweta	Shoshong	131	43	647.618	1172.14	0	0	0	0.922043	0	3.14677e-06	0.922991
Gweta	Tati_siding	131	277	647.618	1669.34	0	0	0	0.922043	0	3.14677e-06	0.922991
Gweta	Tsetsebjwe	131	99	647.618	730.907	0	0	0	0.922043	0	3.14677e-06	0.922991
Lentsweletau	Bokaa	206	73	786.59	763.294	0	0	0	0.922043	0	3.14677e-06	0.922991
Lentsweletau	Digawana	206	28	786.59	594.909	0	0	0	0.922043	0	3.14677e-06	0.922991
Lentsweletau	Gumare	206	260	786.59	1183.25	0	0	0	0.922043	0	3.14677e-06	0.922991
Lentsweletau	Gweta	206	131	786.59	647.618	0	0	0	0.922043	0	3.14677e-06	0.922991
Lentsweletau	Lerala	206	347	786.59	1414.47	0	0	0	0.922043	0	3.14677e-06	0.922991
Lentsweletau	Letlhakeng	206	92	786.59	942.393	0	0	0	0.922043	0	3.14677e-06	0.922991
Lentsweletau	Masunga	206	182	786.59	930.28	0	0	0	0.922043	0	3.14677e-06	0.922991
Lentsweletau	Mathangwane	206	102	786.59	815.916	0	0	0	0.922043	0	3.14677e-06	0.922991
Lentsweletau	Maunatlala	206	236	786.59	652.122	0	0	0	0.922043	0	3.14677e-06	0.922991
Lentsweletau	Metsimotlhabe	206	34	786.59	1277.91	0	0	0	0.922043	0	3.14677e-06	0.922991
Lentsweletau	Mmadinare	206	112	786.59	2184.11	0	0	0	0.922043	0	3.14677e-06	0.922991
Lentsweletau	Mmandunyane	206	56	786.59	550.59	0	0	0	0.922043	0	3.14677e-06	0.922991
Lentsweletau	Mmathethe	206	135	786.59	752.809	0	0	0	0.922043	0	3.14677e-06	0.922991
Lentsweletau	Molapowabojang	206	60	786.59	1123.73	0	0	0	0.922043	0	3.14677e-06	0.922991
Lentsweletau	Nata	206	59	786.59	655.576	0	0	0	0.922043	0	3.14677e-06	0.922991
Lentsweletau	Nkange	206	107	786.59	471.876	0	0	0	0.922043	0	3.14677e-06	0.922991
Lentsweletau	Oodi	206	73	786.59	1191.01	0	0	0	0.922043	0	3.14677e-06	0.922991
Lentsweletau	Otse	206	99	786.59	906.145	0	0	0	0.922043	0	3.14677e-06	0.922991
Lentsweletau	Rakops	206	92	786.59	673.64	0	0	0	0.922043	0	3.14677e-06	0.922991
Lentsweletau	Ramokgonami	206	220	786.59	702.828	0	0	0	0.922043	0	3.14677e-06	0.922991
Lentsweletau	Ranaka	206	34	786.59	519.152	0	0	0	0.922043	0	3.14677e-06	0.922991
Lentsweletau	Sebina	206	51	786.59	374.546	0	0	0	0.922043	0	3.14677e-06	0.922991
Lentsweletau	Sefhare	206	24	786.59	721.311	0	0	0	0.922043	0	3.14677e-06	0.922991
Lentsweletau	Sefophe	206	121	786.59	924.108	0	0	0	0.922043	0	3.14677e-06	0.922991
Lentsweletau	Shakawe	206	313	786.59	1007.32	0	0	0	0.922043	0	3.14677e-06	0.922991
Lentsweletau	Shoshong	206	43	786.59	1172.14	0	0	0	0.922043	0	3.14677e-06	0.922991
Lentsweletau	Tati_siding	206	277	786.59	1669.34	0	0	0	0.922043	0	3.14677e-06	0.922991
Lentsweletau	Tsetsebjwe	206	99	786.59	730.907	0	0	0	0.922043	0	3.14677e-06	0.922991
Lerala	Bokaa	347	73	1414.47	763.294	0	0	0	0.922043	0	3.14677e-06	0.922991
Lerala	Digawana	347	28	1414.47	594.909	0	0	0	0.922043	0	3.14677e-06	0.922991
Lerala	Gumare	347	260	1414.47	1183.25	0	0	0	0.922043	0	3.14677e-06	0.922991
Lerala	Gweta	347	131	1414.47	647.618	0	0	0	0.922043	0	3.14677e-06	0.922991
Lerala	Lentsweletau	347	206	1414.47	786.59	0	0	0	0.922043	0	3.14677e-06	0.922991
Lerala	Letlhakeng	347	92	1414.47	942.393	0	0	0	0.922043	0	3.14677e-06	0.922991
Lerala	Masunga	347	182	1414.47	930.28	0	0	0	0.922043	0	3.14677e-06	0.922991
Lerala	Mathangwane	347	102	1414.47	815.916	0	0	0	0.922043	0	3.14677e-06	0.922991
Lerala	Maunatlala	347	236	1414.47	652.122	0	0	0	0.922043	0	3.14677e-06	0.922991
Lerala	Metsimotlhabe	347	34	1414.47	1277.91	0	0	0	0.922043	0	3.14677e-06	0.922991
Lerala	Mmadinare	347	112	1414.47	2184.11	0	0	0	0.922043	0	3.14677e-06	0.922991
Lerala	Mmandunyane	347	56	1414.47	550.59	0	0	0	0.922043	0	3.14677e-06	0.922991
Lerala	Mmankgodi	347	166	1414.47	1106.41	0	0	0	0.922043	0	3.14677e-06	0.922991
Lerala	Mmathethe	347	135	1414.47	752.809	0	0	0	0.922043	0	3.14677e-06	0.922991
Lerala	Molapowabojang	347	60	1414.47	1123.73	0	0	0	0.922043	0	3.14677e-06	0.922991
Lerala	Nata	347	59	1414.47	655.576	0	0	0	0.922043	0	3.14677e-06	0.922991
Lerala	Nkange	347	107	1414.47	471.876	0	0	0	0.922043	0	3.14677e-06	0.922991
Lerala	Oodi	347	73	1414.47	1191.01	0	0	0	0.922043	0	3.14677e-06	0.922991
Lerala	Otse	347	99	1414.47	906.145	0	0	0	0.922043	0	3.14677e-06	0.922991
Lerala	Rakops	347	92	1414.47	673.64	0	0	0	0.922043	0	3.14677e-06	0.922991
Lerala	Ramokgonami	347	220	1414.47	702.828	0	0	0	0.922043	0	3.14677e-06	0.922991
Lerala	Ranaka	347	34	1414.47	519.152	0	0	0	0.922043	0	3.14677e-06	0.922991
Lerala	Sebina	347	51	1414.47	374.546	0	0	0	0.922043	0	3.14677e-06	0.922991
Lerala	Sefhare	347	24	1414.47	721.311	0	0	0	0.922043	0	3.14677e-06	0.922991
Lerala	Sefophe	347	121	1414.47	924.108	0	0	0	0.922043	0	3.14677e-06	0.922991
Lerala	Shakawe	347	313	1414.47	1007.32	0	0	0	0.922043	0	3.14677e-06	0.922991
Lerala	Shoshong	347	43	1414.47	1172.14	0	0	0	0.922043	0	3.14677e-06	0.922991
Lerala	Tati_siding	347	277	1414.47	1669.34	0	0	0	0.922043	0	3.14677e-06	0.922991
Lerala	Tsetsebjwe	347	99	1414.47	730.907	0	0	0	0.922043	0	3.14677e-06	0.922991
Letlhakeng	Bokaa	92	73	942.393	763.294	0	0	0	0.922043	0	3.14677e-06	0.922991
Letlhakeng	Digawana	92	28	942.393	594.909	0	0	0	0.922043	0	3.14677e-06	0.922991
Letlhakeng	Gumare	92	260	942.393	1183.25	0	0	0	0.922043	0	3.14677e-06	0.922991
Letlhakeng	Gweta	92	131	942.393	647.618	0	0	0	0.922043	0	3.14677e-06	0.922991
Letlhakeng	Lentsweletau	92	206	942.393	786.59	0	0	0	0.922043	0	3.14677e-06	0.922991
Letlhakeng	Lerala	92	347	942.393	1414.47	0	0	0	0.922043	0	3.14677e-06	0.922991
Letlhakeng	Masunga	92	182	942.393	930.28	0	0	0	0.922043	0	3.14677e-06	0.922991
Letlhakeng	Mathangwane	92	102	942.393	815.916	0	0	0	0.922043	0	3.14677e-06	0.922991
Letlhakeng	Maunatlala	92	236	942.393	652.122	0	0	0	0.922043	0	3.14677e-06	0.922991
Letlhakeng	Metsimotlhabe	92	34	942.393	1277.91	0	0	0	0.922043	0	3.14677e-06	0.922991
Letlhakeng	Mmadinare	92	112	942.393	2184.11	0	0	0	0.922043	0	3.14677e-06	0.922991
Letlhakeng	Mmandunyane	92	56	942.393	550.59	0	0	0	0.922043	0	3.14677e-06	0.922991
Letlhakeng	Mmankgodi	92	166	942.393	1106.41	0	0	0	0.922043	0	3.14677e-06	0.922991
Letlhakeng	Mmathethe	92	135	942.393	752.809	0	0	0	0.922043	0	3.14677e-06	0.922991
Letlhakeng	Molapowabojang	92	60	942.393	1123.73	0	0	0	0.922043	0	3.14677e-06	0.922991
Letlhakeng	Nata	92	59	942.393	655.576	0	0	0	0.922043	0	3.14677e-06	0.922991
Letlhakeng	Nkange	92	107	942.393	471.876	0	0	0	0.922043	0	3.14677e-06	0.922991
Letlhakeng	Oodi	92	73	942.393	1191.01	0	0	0	0.922043	0	3.14677e-06	0.922991
Letlhakeng	Otse	92	99	942.393	906.145	0	0	0	0.922043	0	3.14677e-06	0.922991
Letlhakeng	Rakops	92	92	942.393	673.64	0	0	0	0.922043	0	3.14677e-06	0.922991
Letlhakeng	Ramokgonami	92	220	942.393	702.828	0	0	0	0.922043	0	3.14677e-06	0.922991
Letlhakeng	Ranaka	92	34	942.393	519.152	0	0	0	0.922043	0	3.14677e-06	0.922991
Letlhakeng	Sebina	92	51	942.393	374.546	0	0	0	0.922043	0	3.14677e-06	0.922991
Letlhakeng	Sefhare	92	24	942.393	721.311	0	0	0	0.922043	0	3.14677e-06	0.922991
Letlhakeng	Sefophe	92	121	942.393	924.108	0	0	0	0.922043	0	3.14677e-06	0.922991
Letlhakeng	Shakawe	92	313	942.393	1007.32	0	0	0	0.922043	0	3.14677e-06	0.922991
Letlhakeng	Shoshong	92	43	942.393	1172.14	0	0	0	0.922043	0	3.14677e-06	0.922991
Letlhakeng	Tati_siding	92	277	942.393	1669.34	0	0	0	0.922043	0	3.14677e-06	0.922991
Letlhakeng	Tsetsebjwe	92	99	942.393	730.907	0	0	0	0.922043	0	3.14677e-06	0.922991
Masunga	Bokaa	182	73	930.28	763.294	0	0	0	0.922043	0	3.14677e-06	0.922991
Masunga	Digawana	182	28	930.28	594.909	0	0	0	0.922043	0	3.14677e-06	0.922991
Masunga	Gumare	182	260	930.28	1183.25	0	0	0	0.922043	0	3.14677e-06	0.922991
Masunga	Gweta	182	131	930.28	647.618	0	0	0	0.922043	0	3.14677e-06	0.922991
Masunga	Lentsweletau	182	206	930.28	786.59	0	0	0	0.922043	0	3.14677e-06	0.922991
Masunga	Lerala	182	347	930.28	1414.47	0	0	0	0.922043	0	3.14677e-06	0.922991
Masunga	Letlhakeng	182	92	930.28	942.393	0	0	0	0.922043	0	3.14677e-06	0.922991
Masunga	Mathangwane	182	102	930.28	815.916	0	0	0	0.922043	0	3.14677e-06	0.922991
Masunga	Maunatlala	182	236	930.28	652.122	0	0	0	0.922043	0	3.14677e-06	0.922991
Masunga	Metsimotlhabe	182	34	930.28	1277.91	0	0	0	0.922043	0	3.14677e-06	0.922991
Masunga	Mmadinare	182	112	930.28	2184.11	0	0	0	0.922043	0	3.14677e-06	0.922991
Masunga	Mmandunyane	182	56	930.28	550.59	0	0	0	0.922043	0	3.14677e-06	0.922991
Masunga	Mmankgodi	182	166	930.28	1106.41	0	0	0	0.922043	0	3.14677e-06	0.922991
Masunga	Mmathethe	182	135	930.28	752.809	0	0	0	0.922043	0	3.14677e-06	0.922991
Masunga	Molapowabojang	182	60	930.28	1123.73	0	0	0	0.922043	0	3.14677e-06	0.922991
Masunga	Nata	182	59	930.28	655.576	0	0	0	0.922043	0	3.14677e-06	0.922991
Masunga	Nkange	182	107	930.28	471.876	0	0	0	0.922043	0	3.14677e-06	0.922991
Masunga	Oodi	182	73	930.28	1191.01	0	0	0	0.922043	0	3.14677e-06	0.922991
Masunga	Otse	182	99	930.28	906.145	0	0	0	0.922043	0	3.14677e-06	0.922991
Masunga	Rakops	182	92	930.28	673.64	0	0	0	0.922043	0	3.14677e-06	0.922991
Masunga	Ramokgonami	182	220	930.28	702.828	0	0	0	0.922043	0	3.14677e-06	0.922991
Masunga	Ranaka	182	34	930.28	519.152	0	0	0	0.922043	0	3.14677e-06	0.922991
Masunga	Sefhare	182	24	930.28	721.311	0	0	0	0.922043	0	3.14677e-06	0.922991
Masunga	Sefophe	182	121	930.28	924.108	0	0	0	0.922043	0	3.14677e-06	0.922991
Masunga	Shakawe	182	313	930.28	1007.32	0	0	0	0.922043	0	3.14677e-06	0.922991
Masunga	Shoshong	182	43	930.28	1172.14	0	0	0	0.922043	0	3.14677e-06	0.922991
Masunga	Tati_siding	182	277	930.28	1669.34	0	0	0	0.922043	0	3.14677e-06	0.922991
Masunga	Tsetsebjwe	182	99	930.28	730.907	0	0	0	0.922043	0	3.14677e-06	0.922991
Mathangwane	Bokaa	102	73	815.916	763.294	0	0	0	0.922043	0	3.14677e-06	0.922991
Mathangwane	Digawana	102	28	815.916	594.909	0	0	0	0.922043	0	3.14677e-06	0.922991
Mathangwane	Gumare	102	260	815.916	1183.25	0	0	0	0.922043	0	3.14677e-06	0.922991
Mathangwane	Lentsweletau	102	206	815.916	786.59	0	0	0	0.922043	0	3.14677e-06	0.922991
Mathangwane	Lerala	102	347	815.916	1414.47	0	0	0	0.922043	0	3.14677e-06	0.922991
Mathangwane	Letlhakeng	102	92	815.916	942.393	0	0	0	0.922043	0	3.14677e-06	0.922991
Mathangwane	Masunga	102	182	815.916	930.28	0	0	0	0.922043	0	3.14677e-06	0.922991
Mathangwane	Mathangwane	102	102	815.916	815.916	0	0	0	0.922043	0	3.14677e-06	0.922991
Mathangwane	Maunatlala	102	236	815.916	652.122	0	0	0	0.922043	0	3.14677e-06	0.922991
Mathangwane	Metsimotlhabe	102	34	815.916	1277.91	0	0	0	0.922043	0	3.14677e-06	0.922991
Mathangwane	Mmadinare	102	112	815.916	2184.11	0	0	0	0.922043	0	3.14677e-06	0.922991
Mathangwane	Mmandunyane	102	56	815.916	550.59	0	0	0	0.922043	0	3.14677e-06	0.922991
Mathangwane	Mmankgodi	102	166	815.916	1106.41	0	0	0	0.922043	0	3.14677e-06	0.922991
Mathangwane	Mmathethe	102	135	815.916	752.809	0	0	0	0.922043	0	3.14677e-06	0.922991
Mathangwane	Molapowabojang	102	60	815.916	1123.73	0	0	0	0.922043	0	3.14677e-06	0.922991
Mathangwane	Nata	102	59	815.916	655.576	0	0	0	0.922043	0	3.14677e-06	0.922991
Mathangwane	Nkange	102	107	815.916	471.876	0	0	0	0.922043	0	3.14677e-06	0.922991
Mathangwane	Oodi	102	73	815.916	1191.01	0	0	0	0.922043	0	3.14677e-06	0.922991
Mathangwane	Otse	102	99	815.916	906.145	0	0	0	0.922043	0	3.14677e-06	0.922991
Mathangwane	Rakops	102	92	815.916	673.64	0	0	0	0.922043	0	3.14677e-06	0.922991
Mathangwane	Ramokgonami	102	220	815.916	702.828	0	0	0	0.922043	0	3.14677e-06	0.922991
Mathangwane	Ranaka	102	34	815.916	519.152	0	0	0	0.922043	0	3.14677e-06	0.922991
Mathangwane	Sebina	102	51	815.916	374.546	0	0	0	0.922043	0	3.14677e-06	0.922991
Mathangwane	Sefhare	102	24	815.916	721.311	0	0	0	0.922043	0	3.14677e-06	0.922991
Mathangwane	Sefophe	102	121	815.916	924.108	0	0	0	0.922043	0	3.14677e-06	0.922991
Mathangwane	Shakawe	102	313	815.916	1007.32	0	0	0	0.922043	0	3.14677e-06	0.922991
Mathangwane	Shoshong	102	43	815.916	1172.14	0	0	0	0.922043	0	3.14677e-06	0.922991
Mathangwane	Tati_siding	102	277	815.916	1669.34	0	0	0	0.922043	0	3.14677e-06	0.922991
Mathangwane	Tsetsebjwe	102	99	815.916	730.907	0	0	0	0.922043	0	3.14677e-06	0.922991
Maunatlala	Bokaa	236	73	652.122	763.294	0	0	0	0.922043	0	3.14677e-06	0.922991
Maunatlala	Digawana	236	28	652.122	594.909	0	0	0	0.922043	0	3.14677e-06	0.922991
Maunatlala	Gumare	236	260	652.122	1183.25	0	0	0	0.922043	0	3.14677e-06	0.922991
Maunatlala	Gweta	236	131	652.122	647.618	0	0	0	0.922043	0	3.14677e-06	0.922991
Maunatlala	Lentsweletau	236	206	652.122	786.59	0	0	0	0.922043	0	3.14677e-06	0.922991
Maunatlala	Lerala	236	347	652.122	1414.47	0	0	0	0.922043	0	3.14677e-06	0.922991
Maunatlala	Letlhakeng	236	92	652.122	942.393	0	0	0	0.922043	0	3.14677e-06	0.922991
Maunatlala	Masunga	236	182	652.122	930.28	0	0	0	0.922043	0	3.14677e-06	0.922991
Maunatlala	Mathangwane	236	102	652.122	815.916	0	0	0	0.922043	0	3.14677e-06	0.922991
Maunatlala	Metsimotlhabe	236	34	652.122	1277.91	0	0	0	0.922043	0	3.14677e-06	0.922991
Maunatlala	Mmadinare	236	112	652.122	2184.11	0	0	0	0.922043	0	3.14677e-06	0.922991
Maunatlala	Mmandunyane	236	56	652.122	550.59	0	0	0	0.922043	0	3.14677e-06	0.922991
Maunatlala	Mmankgodi	236	166	652.122	1106.41	0	0	0	0.922043	0	3.14677e-06	0.922991
Maunatlala	Mmathethe	236	135	652.122	752.809	0	0	0	0.922043	0	3.14677e-06	0.922991
Maunatlala	Molapowabojang	236	60	652.122	1123.73	0	0	0	0.922043	0	3.14677e-06	0.922991
Maunatlala	Nata	236	59	652.122	655.576	0	0	0	0.922043	0	3.14677e-06	0.922991
Maunatlala	Nkange	236	107	652.122	471.876	0	0	0	0.922043	0	3.14677e-06	0.922991
Maunatlala	Oodi	236	73	652.122	1191.01	0	0	0	0.922043	0	3.14677e-06	0.922991
Maunatlala	Otse	236	99	652.122	906.145	0	0	0	0.922043	0	3.14677e-06	0.922991
Maunatlala	Rakops	236	92	652.122	673.64	0	0	0	0.922043	0	3.14677e-06	0.922991
Maunatlala	Ramokgonami	236	220	652.122	702.828	0	0	0	0.922043	0	3.14677e-06	0.922991
Maunatlala	Ranaka	236	34	652.122	519.152	0	0	0	0.922043	0	3.14677e-06	0.922991
Maunatlala	Sebina	236	51	652.122	374.546	0	0	0	0.922043	0	3.14677e-06	0.922991
Maunatlala	Sefhare	236	24	652.122	721.311	0	0	0	0.922043	0	3.14677e-06	0.922991
Maunatlala	Sefophe	236	121	652.122	924.108	0	0	0	0.922043	0	3.14677e-06	0.922991
Maunatlala	Shakawe	236	313	652.122	1007.32	0	0	0	0.922043	0	3.14677e-06	0.922991
Maunatlala	Shoshong	236	43	652.122	1172.14	0	0	0	0.922043	0	3.14677e-06	0.922991
Maunatlala	Tati_siding	236	277	652.122	1669.34	0	0	0	0.922043	0	3.14677e-06	0.922991
Maunatlala	Tsetsebjwe	236	99	652.122	730.907	0	0	0	0.922043	0	3.14677e-06	0.922991
Metsimotlhabe	Bokaa	34	73	1277.91	763.294	0	0	0	0.922043	0	3.14677e-06	0.922991
Metsimotlhabe	Digawana	34	28	1277.91	594.909	0	0	0	0.922043	0	3.14677e-06	0.922991
Metsimotlhabe	Gumare	34	260	1277.91	1183.25	0	0	0	0.922043	0	3.14677e-06	0.922991
Metsimotlhabe	Gweta	34	131	1277.91	647.618	0	0	0	0.922043	0	3.14677e-06	0.922991
Metsimotlhabe	Lentsweletau	34	206	1277.91	786.59	0	0	0	0.922043	0	3.14677e-06	0.922991
Metsimotlhabe	Lerala	34	347	1277.91	1414.47	0	0	0	0.922043	0	3.14677e-06	0.922991
Metsimotlhabe	Letlhakeng	34	92	1277.91	942.393	0	0	0	0.922043	0	3.14677e-06	0.922991
Metsimotlhabe	Masunga	34	182	1277.91	930.28	0	0	0	0.922043	0	3.14677e-06	0.922991
Metsimotlhabe	Mathangwane	34	102	1277.91	815.916	0	0	0	0.922043	0	3.14677e-06	0.922991
Metsimotlhabe	Maunatlala	34	236	1277.91	652.122	0	0	0	0.922043	0	3.14677e-06	0.922991
Metsimotlhabe	Metsimotlhabe	34	34	1277.91	1277.91	0	0	0	0.922043	0	3.14677e-06	0.922991
Metsimotlhabe	Mmadinare	34	112	1277.91	2184.11	0	0	0	0.922043	0	3.14677e-06	0.922991
Metsimotlhabe	Mmandunyane	34	56	1277.91	550.59	0	0	0	0.922043	0	3.14677e-06	0.922991
Metsimotlhabe	Mmankgodi	34	166	1277.91	1106.41	0	0	0	0.922043	0	3.14677e-06	0.922991
Metsimotlhabe	Mmathethe	34	135	1277.91	752.809	0	0	0	0.922043	0	3.14677e-06	0.922991
Metsimotlhabe	Molapowabojang	34	60	1277.91	1123.73	0	0	0	0.922043	0	3.14677e-06	0.922991
Metsimotlhabe	Nata	34	59	1277.91	655.576	0	0	0	0.922043	0	3.14677e-06	0.922991
Metsimotlhabe	Nkange	34	107	1277.91	471.876	0	0	0	0.922043	0	3.14677e-06	0.922991
Metsimotlhabe	Oodi	34	73	1277.91	1191.01	0	0	0	0.922043	0	3.14677e-06	0.922991
Metsimotlhabe	Otse	34	99	1277.91	906.145	0	0	0	0.922043	0	3.14677e-06	0.922991
Metsimotlhabe	Rakops	34	92	1277.91	673.64	0	0	0	0.922043	0	3.14677e-06	0.922991
Metsimotlhabe	Ramokgonami	34	220	1277.91	702.828	0	0	0	0.922043	0	3.14677e-06	0.922991
Metsimotlhabe	Ranaka	34	34	1277.91	519.152	0	0	0	0.922043	0	3.14677e-06	0.922991
Metsimotlhabe	Sebina	34	51	1277.91	374.546	0	0	0	0.922043	0	3.14677e-06	0.922991
Metsimotlhabe	Sefhare	34	24	1277.91	721.311	0	0	0	0.922043	0	3.14677e-06	0.922991
Metsimotlhabe	Sefophe	34	121	1277.91	924.108	0	0	0	0.922043	0	3.14677e-06	0.922991
Metsimotlhabe	Shakawe	34	313	1277.91	1007.32	0	0	0	0.922043	0	3.14677e-06	0.922991
Metsimotlhabe	Shoshong	34	43	1277.91	1172.14	0	0	0	0.922043	0	3.14677e-06	0.922991
Metsimotlhabe	Tati_siding	34	277	1277.91	1669.34	0	0	0	0.922043	0	3.14677e-06	0.922991
Metsimotlhabe	Tsetsebjwe	34	99	1277.91	730.907	0	0	0	0.922043	0	3.14677e-06	0.922991
Mmadinare	Bokaa	112	73	2184.11	763.294	0	0	0	0.922043	0	3.14677e-06	0.922991
Mmadinare	Digawana	112	28	2184.11	594.909	0	0	0	0.922043	0	3.14677e-06	0.922991
Mmadinare	Gumare	112	260	2184.11	1183.25	0	0	0	0.922043	0	3.14677e-06	0.922991
Mmadinare	Gweta	112	131	2184.11	647.618	0	0	0	0.922043	0	3.14677e-06	0.922991
Mmadinare	Lentsweletau	112	206	2184.11	786.59	0	0	0	0.922043	0	3.14677e-06	0.922991
Mmadinare	Letlhakeng	112	92	2184.11	942.393	0	0	0	0.922043	0	3.14677e-06	0.922991
Mmadinare	Masunga	112	182	2184.11	930.28	0	0	0	0.922043	0	3.14677e-06	0.922991
Mmadinare	Mathangwane	112	102	2184.11	815.916	0	0	0	0.922043	0	3.14677e-06	0.922991
Mmadinare	Maunatlala	112	236	2184.11	652.122	0	0	0	0.922043	0	3.14677e-06	0.922991
Mmadinare	Metsimotlhabe	112	34	2184.11	1277.91	0	0	0	0.922043	0	3.14677e-06	0.922991
Mmadinare	Mmandunyane	112	56	2184.11	550.59	0	0	0	0.922043	0	3.14677e-06	0.922991
Mmadinare	Mmankgodi	112	166	2184.11	1106.41	0	0	0	0.922043	0	3.14677e-06	0.922991
Mmadinare	Mmathethe	112	135	2184.11	752.809	0	0	0	0.922043	0	3.14677e-06	0.922991
Mmadinare	Molapowabojang	112	60	2184.11	1123.73	0	0	0	0.922043	0	3.14677e-06	0.922991
Mmadinare	Nata	112	59	2184.11	655.576	0	0	0	0.922043	0	3.14677e-06	0.922991
Mmadinare	Nkange	112	107	2184.11	471.876	0	0	0	0.922043	0	3.14677e-06	0.922991
Mmadinare	Oodi	112	73	2184.11	1191.01	0	0	0	0.922043	0	3.14677e-06	0.922991
Mmadinare	Otse	112	99	2184.11	906.145	0	0	0	0.922043	0	3.14677e-06	0.922991
Mmadinare	Rakops	112	92	2184.11	673.64	0	0	0	0.922043	0	3.14677e-06	0.922991
Mmadinare	Ramokgonami	112	220	2184.11	702.828	0	0	0	0.922043	0	3.14677e-06	0.922991
Mmadinare	Ranaka	112	34	2184.11	519.152	0	0	0	0.922043	0	3.14677e-06	0.922991
Mmadinare	Sebina	112	51	2184.11	374.546	0	0	0	0.922043	0	3.14677e-06	0.922991
Mmadinare	Sefhare	112	24	2184.11	721.311	0	0	0	0.922043	0	3.14677e-06	0.922991
Mmadinare	Sefophe	112	121	2184.11	924.108	0	0	0	0.922043	0	3.14677e-06	0.922991
Mmadinare	Shakawe	112	313	2184.11	1007.32	0	0	0	0.922043	0	3.14677e-06	0.922991
Mmadinare	Shoshong	112	43	2184.11	1172.14	0	0	0	0.922043	0	3.14677e-06	0.922991
Mmadinare	Tati_siding	112	277	2184.11	1669.34	0	0	0	0.922043	0	3.14677e-06	0.922991
Mmadinare	Tsetsebjwe	112	99	2184.11	730.907	0	0	0	0.922043	0	3.14677e-06	0.922991
Mmandunyane	Bokaa	56	73	550.59	763.294	0	0	0	0.922043	0	3.14677e-06	0.922991
Mmandunyane	Digawana	56	28	550.59	594.909	0	0	0	0.922043	0	3.14677e-06	0.922991
Mmandunyane	Gumare	56	260	550.59	1183.25	0	0	0	0.922043	0	3.14677e-06	0.922991
Mmandunyane	Gweta	56	131	550.59	647.618	0	0	0	0.922043	0	3.14677e-06	0.922991
Mmandunyane	Lentsweletau	56	206	550.59	786.59	0	0	0	0.922043	0	3.14677e-06	0.922991
Mmandunyane	Lerala	56	347	550.59	1414.47	0	0	0	0.922043	0	3.14677e-06	0.922991
Mmandunyane	Letlhakeng	56	92	550.59	942.393	0	0	0	0.922043	0	3.14677e-06	0.922991
Mmandunyane	Masunga	56	182	550.59	930.28	0	0	0	0.922043	0	3.14677e-06	0.922991
Mmandunyane	Mathangwane	56	102	550.59	815.916	0	0	0	0.922043	0	3.14677e-06	0.922991
Mmandunyane	Maunatlala	56	236	550.59	652.122	0	0	0	0.922043	0	3.14677e-06	0.922991
Mmandunyane	Metsimotlhabe	56	34	550.59	1277.91	0	0	0	0.922043	0	3.14677e-06	0.922991
Mmandunyane	Mmadinare	56	112	550.59	2184.11	0	0	0	0.922043	0	3.14677e-06	0.922991
Mmandunyane	Mmankgodi	56	166	550.59	1106.41	0	0	0	0.922043	0	3.14677e-06	0.922991
Mmandunyane	Mmathethe	56	135	550.59	752.809	0	0	0	0.922043	0	3.14677e-06	0.922991
Mmandunyane	Molapowabojang	56	60	550.59	1123.73	0	0	0	0.922043	0	3.14677e-06	0.922991
Mmandunyane	Nata	56	59	550.59	655.576	0	0	0	0.922043	0	3.14677e-06	0.922991
Mmandunyane	Nkange	56	107	550.59	471.876	0	0	0	0.922043	0	3.14677e-06	0.922991
Mmandunyane	Oodi	56	73	550.59	1191.01	0	0	0	0.922043	0	3.14677e-06	0.922991
Mmandunyane	Otse	56	99	550.59	906.145	0	0	0	0.922043	0	3.14677e-06	0.922991
Mmandunyane	Rakops	56	92	550.59	673.64	0	0	0	0.922043	0	3.14677e-06	0.922991
Mmandunyane	Ramokgonami	56	220	550.59	702.828	0	0	0	0.922043	0	3.14677e-06	0.922991
Mmandunyane	Ranaka	56	34	550.59	519.152	0	0	0	0.922043	0	3.14677e-06	0.922991
Mmandunyane	Sebina	56	51	550.59	374.546	0	0	0	0.922043	0	3.14677e-06	0.922991
Mmandunyane	Sefhare	56	24	550.59	721.311	0	0	0	0.922043	0	3.14677e-06	0.922991
Mmandunyane	Sefophe	56	121	550.59	924.108	0	0	0	0.922043	0	3.14677e-06	0.922991
Mmandunyane	Shakawe	56	313	550.59	1007.32	0	0	0	0.922043	0	3.14677e-06	0.922991
Mmandunyane	Shoshong	56	43	550.59	1172.14	0	0	0	0.922043	0	3.14677e-06	0.922991
Mmandunyane	Tati_siding	56	277	550.59	1669.34	0	0	0	0.922043	0	3.14677e-06	0.922991
Mmandunyane	Tsetsebjwe	56	99	550.59	730.907	0	0	0	0.922043	0	3.14677e-06	0.922991
Mmankgodi	Bokaa	166	73	1106.41	763.294	0	0	0	0.922043	0	3.14677e-06	0.922991
Mmankgodi	Digawana	166	28	1106.41	594.909	0	0	0	0.922043	0	3.14677e-06	0.922991
Mmankgodi	Gumare	166	260	1106.41	1183.25	0	0	0	0.922043	0	3.14677e-06	0.922991
Mmankgodi	Gweta	166	131	1106.41	647.618	0	0	0	0.922043	0	3.14677e-06	0.922991
Mmankgodi	Lentsweletau	166	206	1106.41	786.59	0	0	0	0.922043	0	3.14677e-06	0.922991
Mmankgodi	Letlhakeng	166	92	1106.41	942.393	0	0	0	0.922043	0	3.14677e-06	0.922991
Mmankgodi	Masunga	166	182	1106.41	930.28	0	0	0	0.922043	0	3.14677e-06	0.922991
Mmankgodi	Mathangwane	166	102	1106.41	815.916	0	0	0	0.922043	0	3.14677e-06	0.922991
Mmankgodi	Metsimotlhabe	166	34	1106.41	1277.91	0	0	0	0.922043	0	3.14677e-06	0.922991
Mmankgodi	Mmadinare	166	112	1106.41	2184.11	0	0	0	0.922043	0	3.14677e-06	0.922991
Mmankgodi	Mmandunyane	166	56	1106.41	550.59	0	0	0	0.922043	0	3.14677e-06	0.922991
Mmankgodi	Molapowabojang	166	60	1106.41	1123.73	0	0	0	0.922043	0	3.14677e-06	0.922991
Mmankgodi	Nkange	166	107	1106.41	471.876	0	0	0	0.922043	0	3.14677e-06	0.922991
Mmankgodi	Oodi	166	73	1106.41	1191.01	0	0	0	0.922043	0	3.14677e-06	0.922991
Mmankgodi	Otse	166	99	1106.41	906.145	0	0	0	0.922043	0	3.14677e-06	0.922991
Mmankgodi	Rakops	166	92	1106.41	673.64	0	0	0	0.922043	0	3.14677e-06	0.922991
Mmankgodi	Ramokgonami	166	220	1106.41	702.828	0	0	0	0.922043	0	3.14677e-06	0.922991
Mmankgodi	Ranaka	166	34	1106.41	519.152	0	0	0	0.922043	0	3.14677e-06	0.922991
Mmankgodi	Sebina	166	51	1106.41	374.546	0	0	0	0.922043	0	3.14677e-06	0.922991
Mmankgodi	Sefhare	166	24	1106.41	721.311	0	0	0	0.922043	0	3.14677e-06	0.922991
Mmankgodi	Sefophe	166	121	1106.41	924.108	0	0	0	0.922043	0	3.14677e-06	0.922991
Mmankgodi	Shakawe	166	313	1106.41	1007.32	0	0	0	0.922043	0	3.14677e-06	0.922991
Mmankgodi	Shoshong	166	43	1106.41	1172.14	0	0	0	0.922043	0	3.14677e-06	0.922991
Mmankgodi	Tati_siding	166	277	1106.41	1669.34	0	0	0	0.922043	0	3.14677e-06	0.922991
Mmankgodi	Tsetsebjwe	166	99	1106.41	730.907	0	0	0	0.922043	0	3.14677e-06	0.922991
Mmathethe	Bokaa	135	73	752.809	763.294	0	0	0	0.922043	0	3.14677e-06	0.922991
Mmathethe	Digawana	135	28	752.809	594.909	0	0	0	0.922043	0	3.14677e-06	0.922991
Mmathethe	Gumare	135	260	752.809	1183.25	0	0	0	0.922043	0	3.14677e-06	0.922991
Mmathethe	Gweta	135	131	752.809	647.618	0	0	0	0.922043	0	3.14677e-06	0.922991
Mmathethe	Lentsweletau	135	206	752.809	786.59	0	0	0	0.922043	0	3.14677e-06	0.922991
Mmathethe	Lerala	135	347	752.809	1414.47	0	0	0	0.922043	0	3.14677e-06	0.922991
Mmathethe	Letlhakeng	135	92	752.809	942.393	0	0	0	0.922043	0	3.14677e-06	0.922991
Mmathethe	Masunga	135	182	752.809	930.28	0	0	0	0.922043	0	3.14677e-06	0.922991
Mmathethe	Mathangwane	135	102	752.809	815.916	0	0	0	0.922043	0	3.14677e-06	0.922991
Mmathethe	Maunatlala	135	236	752.809	652.122	0	0	0	0.922043	0	3.14677e-06	0.922991
Mmathethe	Mmadinare	135	112	752.809	2184.11	0	0	0	0.922043	0	3.14677e-06	0.922991
Mmathethe	Mmandunyane	135	56	752.809	550.59	0	0	0	0.922043	0	3.14677e-06	0.922991
Mmathethe	Mmankgodi	135	166	752.809	1106.41	0	0	0	0.922043	0	3.14677e-06	0.922991
Mmathethe	Molapowabojang	135	60	752.809	1123.73	0	0	0	0.922043	0	3.14677e-06	0.922991
Mmathethe	Nata	135	59	752.809	655.576	0	0	0	0.922043	0	3.14677e-06	0.922991
Mmathethe	Nkange	135	107	752.809	471.876	0	0	0	0.922043	0	3.14677e-06	0.922991
Mmathethe	Oodi	135	73	752.809	1191.01	0	0	0	0.922043	0	3.14677e-06	0.922991
Mmathethe	Otse	135	99	752.809	906.145	0	0	0	0.922043	0	3.14677e-06	0.922991
Mmathethe	Rakops	135	92	752.809	673.64	0	0	0	0.922043	0	3.14677e-06	0.922991
Mmathethe	Ramokgonami	135	220	752.809	702.828	0	0	0	0.922043	0	3.14677e-06	0.922991
Mmathethe	Ranaka	135	34	752.809	519.152	0	0	0	0.922043	0	3.14677e-06	0.922991
Mmathethe	Sebina	135	51	752.809	374.546	0	0	0	0.922043	0	3.14677e-06	0.922991
Mmathethe	Sefhare	135	24	752.809	721.311	0	0	0	0.922043	0	3.14677e-06	0.922991
Mmathethe	Sefophe	135	121	752.809	924.108	0	0	0	0.922043	0	3.14677e-06	0.922991
Mmathethe	Shakawe	135	313	752.809	1007.32	0	0	0	0.922043	0	3.14677e-06	0.922991
Mmathethe	Shoshong	135	43	752.809	1172.14	0	0	0	0.922043	0	3.14677e-06	0.922991
Mmathethe	Tati_siding	135	277	752.809	1669.34	0	0	0	0.922043	0	3.14677e-06	0.922991
Mmathethe	Tsetsebjwe	135	99	752.809	730.907	0	0	0	0.922043	0	3.14677e-06	0.922991
Molapowabojang	Bokaa	60	73	1123.73	763.294	0	0	0	0.922043	0	3.14677e-06	0.922991
Molapowabojang	Digawana	60	28	1123.73	594.909	0	0	0	0.922043	0	3.14677e-06	0.922991
Molapowabojang	Gumare	60	260	1123.73	1183.25	0	0	0	0.922043	0	3.14677e-06	0.922991
Molapowabojang	Gweta	60	131	1123.73	647.618	0	0	0	0.922043	0	3.14677e-06	0.922991
Molapowabojang	Lentsweletau	60	206	1123.73	786.59	0	0	0	0.922043	0	3.14677e-06	0.922991
Molapowabojang	Lerala	60	347	1123.73	1414.47	0	0	0	0.922043	0	3.14677e-06	0.922991
Molapowabojang	Letlhakeng	60	92	1123.73	942.393	0	0	0	0.922043	0	3.14677e-06	0.922991
Molapowabojang	Masunga	60	182	1123.73	930.28	0	0	0	0.922043	0	3.14677e-06	0.922991
Molapowabojang	Mathangwane	60	102	1123.73	815.916	0	0	0	0.922043	0	3.14677e-06	0.922991
Molapowabojang	Maunatlala	60	236	1123.73	652.122	0	0	0	0.922043	0	3.14677e-06	0.922991
Molapowabojang	Metsimotlhabe	60	34	1123.73	1277.91	0	0	0	0.922043	0	3.14677e-06	0.922991
Molapowabojang	Mmadinare	60	112	1123.73	2184.11	0	0	0	0.922043	0	3.14677e-06	0.922991
Molapowabojang	Mmandunyane	60	56	1123.73	550.59	0	0	0	0.922043	0	3.14677e-06	0.922991
Molapowabojang	Mmankgodi	60	166	1123.73	1106.41	0	0	0	0.922043	0	3.14677e-06	0.922991
Molapowabojang	Mmathethe	60	135	1123.73	752.809	0	0	0	0.922043	0	3.14677e-06	0.922991
Molapowabojang	Nata	60	59	1123.73	655.576	0	0	0	0.922043	0	3.14677e-06	0.922991
Molapowabojang	Nkange	60	107	1123.73	471.876	0	0	0	0.922043	0	3.14677e-06	0.922991
Molapowabojang	Oodi	60	73	1123.73	1191.01	0	0	0	0.922043	0	3.14677e-06	0.922991
Molapowabojang	Otse	60	99	1123.73	906.145	0	0	0	0.922043	0	3.14677e-06	0.922991
Molapowabojang	Rakops	60	92	1123.73	673.64	0	0	0	0.922043	0	3.14677e-06	0.922991
Molapowabojang	Ramokgonami	60	220	1123.73	702.828	0	0	0	0.922043	0	3.14677e-06	0.922991
Molapowabojang	Ranaka	60	34	1123.73	519.152	0	0	0	0.922043	0	3.14677e-06	0.922991
Molapowabojang	Sebina	60	51	1123.73	374.546	0	0	0	0.922043	0	3.14677e-06	0.922991
Molapowabojang	Sefhare	60	24	1123.73	721.311	0	0	0	0.922043	0	3.14677e-06	0.922991
Molapowabojang	Sefophe	60	121	1123.73	924.108	0	0	0	0.922043	0	3.14677e-06	0.922991
Molapowabojang	Shakawe	60	313	1123.73	1007.32	0	0	0	0.922043	0	3.14677e-06	0.922991
Molapowabojang	Shoshong	60	43	1123.73	1172.14	0	0	0	0.922043	0	3.14677e-06	0.922991
Molapowabojang	Tati_siding	60	277	1123.73	1669.34	0	0	0	0.922043	0	3.14677e-06	0.922991
Molapowabojang	Tsetsebjwe	60	99	1123.73	730.907	0	0	0	0.922043	0	3.14677e-06	0.922991
Nata	Bokaa	59	73	655.576	763.294	0	0	0	0.922043	0	3.14677e-06	0.922991
Nata	Digawana	59	28	655.576	594.909	0	0	0	0.922043	0	3.14677e-06	0.922991
Nata	Gweta	59	131	655.576	647.618	0	0	0	0.922043	0	3.14677e-06	0.922991
Nata	Lerala	59	347	655.576	1414.47	0	0	0	0.922043	0	3.14677e-06	0.922991
Nata	Letlhakeng	59	92	655.576	942.393	0	0	0	0.922043	0	3.14677e-06	0.922991
Nata	Masunga	59	182	655.576	930.28	0	0	0	0.922043	0	3.14677e-06	0.922991
Nata	Mathangwane	59	102	655.576	815.916	0	0	0	0.922043	0	3.14677e-06	0.922991
Nata	Maunatlala	59	236	655.576	652.122	0	0	0	0.922043	0	3.14677e-06	0.922991
Nata	Metsimotlhabe	59	34	655.576	1277.91	0	0	0	0.922043	0	3.14677e-06	0.922991
Nata	Mmadinare	59	112	655.576	2184.11	0	0	0	0.922043	0	3.14677e-06	0.922991
Nata	Mmandunyane	59	56	655.576	550.59	0	0	0	0.922043	0	3.14677e-06	0.922991
Nata	Mmankgodi	59	166	655.576	1106.41	0	0	0	0.922043	0	3.14677e-06	0.922991
Nata	Mmathethe	59	135	655.576	752.809	0	0	0	0.922043	0	3.14677e-06	0.922991
Nata	Molapowabojang	59	60	655.576	1123.73	0	0	0	0.922043	0	3.14677e-06	0.922991
Nata	Nkange	59	107	655.576	471.876	0	0	0	0.922043	0	3.14677e-06	0.922991
Nata	Oodi	59	73	655.576	1191.01	0	0	0	0.922043	0	3.14677e-06	0.922991
Nata	Otse	59	99	655.576	906.145	0	0	0	0.922043	0	3.14677e-06	0.922991
Nata	Rakops	59	92	655.576	673.64	0	0	0	0.922043	0	3.14677e-06	0.922991
Nata	Ramokgonami	59	220	655.576	702.828	0	0	0	0.922043	0	3.14677e-06	0.922991
Nata	Ranaka	59	34	655.576	519.152	0	0	0	0.922043	0	3.14677e-06	0.922991
Nata	Sebina	59	51	655.576	374.546	0	0	0	0.922043	0	3.14677e-06	0.922991
Nata	Sefhare	59	24	655.576	721.311	0	0	0	0.922043	0	3.14677e-06	0.922991
Nata	Sefophe	59	121	655.576	924.108	0	0	0	0.922043	0	3.14677e-06	0.922991
Nata	Shakawe	59	313	655.576	1007.32	0	0	0	0.922043	0	3.14677e-06	0.922991
Nata	Shoshong	59	43	655.576	1172.14	0	0	0	0.922043	0	3.14677e-06	0.922991
Nata	Tati_siding	59	277	655.576	1669.34	0	0	0	0.922043	0	3.14677e-06	0.922991
Nata	Tsetsebjwe	59	99	655.576	730.907	0	0	0	0.922043	0	3.14677e-06	0.922991
Nkange	Bokaa	107	73	471.876	763.294	0	0	0	0.922043	0	3.14677e-06	0.922991
Nkange	Digawana	107	28	471.876	594.909	0	0	0	0.922043	0	3.14677e-06	0.922991
Nkange	Gumare	107	260	471.876	1183.25	0	0	0	0.922043	0	3.14677e-06	0.922991
Nkange	Gweta	107	131	471.876	647.618	0	0	0	0.922043	0	3.14677e-06	0.922991
Nkange	Lentsweletau	107	206	471.876	786.59	0	0	0	0.922043	0	3.14677e-06	0.922991
Nkange	Lerala	107	347	471.876	1414.47	0	0	0	0.922043	0	3.14677e-06	0.922991
Nkange	Letlhakeng	107	92	471.876	942.393	0	0	0	0.922043	0	3.14677e-06	0.922991
Nkange	Masunga	107	182	471.876	930.28	0	0	0	0.922043	0	3.14677e-06	0.922991
Nkange	Mathangwane	107	102	471.876	815.916	0	0	0	0.922043	0	3.14677e-06	0.922991
Nkange	Maunatlala	107	236	471.876	652.122	0	0	0	0.922043	0	3.14677e-06	0.922991
Nkange	Metsimotlhabe	107	34	471.876	1277.91	0	0	0	0.922043	0	3.14677e-06	0.922991
Nkange	Mmadinare	107	112	471.876	2184.11	0	0	0	0.922043	0	3.14677e-06	0.922991
Nkange	Mmandunyane	107	56	471.876	550.59	0	0	0	0.922043	0	3.14677e-06	0.922991
Nkange	Mmankgodi	107	166	471.876	1106.41	0	0	0	0.922043	0	3.14677e-06	0.922991
Nkange	Mmathethe	107	135	471.876	752.809	0	0	0	0.922043	0	3.14677e-06	0.922991
Nkange	Molapowabojang	107	60	471.876	1123.73	0	0	0	0.922043	0	3.14677e-06	0.922991
Nkange	Nata	107	59	471.876	655.576	0	0	0	0.922043	0	3.14677e-06	0.922991
Nkange	Oodi	107	73	471.876	1191.01	0	0	0	0.922043	0	3.14677e-06	0.922991
Nkange	Otse	107	99	471.876	906.145	0	0	0	0.922043	0	3.14677e-06	0.922991
Nkange	Rakops	107	92	471.876	673.64	0	0	0	0.922043	0	3.14677e-06	0.922991
Nkange	Ramokgonami	107	220	471.876	702.828	0	0	0	0.922043	0	3.14677e-06	0.922991
Nkange	Ranaka	107	34	471.876	519.152	0	0	0	0.922043	0	3.14677e-06	0.922991
Nkange	Sebina	107	51	471.876	374.546	0	0	0	0.922043	0	3.14677e-06	0.922991
Nkange	Sefhare	107	24	471.876	721.311	0	0	0	0.922043	0	3.14677e-06	0.922991
Nkange	Sefophe	107	121	471.876	924.108	0	0	0	0.922043	0	3.14677e-06	0.922991
Nkange	Shakawe	107	313	471.876	1007.32	0	0	0	0.922043	0	3.14677e-06	0.922991
Nkange	Shoshong	107	43	471.876	1172.14	0	0	0	0.922043	0	3.14677e-06	0.922991
Nkange	Tsetsebjwe	107	99	471.876	730.907	0	0	0	0.922043	0	3.14677e-06	0.922991
Oodi	Bokaa	73	73	1191.01	763.294	0	0	0	0.922043	0	3.14677e-06	0.922991
Oodi	Digawana	73	28	1191.01	594.909	0	0	0	0.922043	0	3.14677e-06	0.922991
Oodi	Gumare	73	260	1191.01	1183.25	0	0	0	0.922043	0	3.14677e-06	0.922991
Oodi	Gweta	73	131	1191.01	647.618	0	0	0	0.922043	0	3.14677e-06	0.922991
Oodi	Lentsweletau	73	206	1191.01	786.59	0	0	0	0.922043	0	3.14677e-06	0.922991
Oodi	Lerala	73	347	1191.01	1414.47	0	0	0	0.922043	0	3.14677e-06	0.922991
Oodi	Letlhakeng	73	92	1191.01	942.393	0	0	0	0.922043	0	3.14677e-06	0.922991
Oodi	Masunga	73	182	1191.01	930.28	0	0	0	0.922043	0	3.14677e-06	0.922991
Oodi	Mathangwane	73	102	1191.01	815.916	0	0	0	0.922043	0	3.14677e-06	0.922991
Oodi	Maunatlala	73	236	1191.01	652.122	0	0	0	0.922043	0	3.14677e-06	0.922991
Oodi	Metsimotlhabe	73	34	1191.01	1277.91	0	0	0	0.922043	0	3.14677e-06	0.922991
Oodi	Mmadinare	73	112	1191.01	2184.11	0	0	0	0.922043	0	3.14677e-06	0.922991
Oodi	Mmandunyane	73	56	1191.01	550.59	0	0	0	0.922043	0	3.14677e-06	0.922991
Oodi	Mmankgodi	73	166	1191.01	1106.41	0	0	0	0.922043	0	3.14677e-06	0.922991
Oodi	Mmathethe	73	135	1191.01	752.809	0	0	0	0.922043	0	3.14677e-06	0.922991
Oodi	Molapowabojang	73	60	1191.01	1123.73	0	0	0	0.922043	0	3.14677e-06	0.922991
Oodi	Nata	73	59	1191.01	655.576	0	0	0	0.922043	0	3.14677e-06	0.922991
Oodi	Nkange	73	107	1191.01	471.876	0	0	0	0.922043	0	3.14677e-06	0.922991
Oodi	Oodi	73	73	1191.01	1191.01	0	0	0	0.922043	0	3.14677e-06	0.922991
Oodi	Otse	73	99	1191.01	906.145	0	0	0	0.922043	0	3.14677e-06	0.922991
Oodi	Rakops	73	92	1191.01	673.64	0	0	0	0.922043	0	3.14677e-06	0.922991
Oodi	Ramokgonami	73	220	1191.01	702.828	0	0	0	0.922043	0	3.14677e-06	0.922991
Oodi	Ranaka	73	34	1191.01	519.152	0	0	0	0.922043	0	3.14677e-06	0.922991
Oodi	Sebina	73	51	1191.01	374.546	0	0	0	0.922043	0	3.14677e-06	0.922991
Oodi	Sefhare	73	24	1191.01	721.311	0	0	0	0.922043	0	3.14677e-06	0.922991
Oodi	Sefophe	73	121	1191.01	924.108	0	0	0	0.922043	0	3.14677e-06	0.922991
Oodi	Shakawe	73	313	1191.01	1007.32	0	0	0	0.922043	0	3.14677e-06	0.922991
Oodi	Shoshong	73	43	1191.01	1172.14	0	0	0	0.922043	0	3.14677e-06	0.922991
Oodi	Tati_siding	73	277	1191.01	1669.34	0	0	0	0.922043	0	3.14677e-06	0.922991
Oodi	Tsetsebjwe	73	99	1191.01	730.907	0	0	0	0.922043	0	3.14677e-06	0.922991
Otse	Bokaa	99	73	906.145	763.294	0	0	0	0.922043	0	3.14677e-06	0.922991
Otse	Digawana	99	28	906.145	594.909	0	0	0	0.922043	0	3.14677e-06	0.922991
Otse	Gumare	99	260	906.145	1183.25	0	0	0	0.922043	0	3.14677e-06	0.922991
Otse	Gweta	99	131	906.145	647.618	0	0	0	0.922043	0	3.14677e-06	0.922991
Otse	Lentsweletau	99	206	906.145	786.59	0	0	0	0.922043	0	3.14677e-06	0.922991
Otse	Lerala	99	347	906.145	1414.47	0	0	0	0.922043	0	3.14677e-06	0.922991
Otse	Letlhakeng	99	92	906.145	942.393	0	0	0	0.922043	0	3.14677e-06	0.922991
Otse	Masunga	99	182	906.145	930.28	0	0	0	0.922043	0	3.14677e-06	0.922991
Otse	Mathangwane	99	102	906.145	815.916	0	0	0	0.922043	0	3.14677e-06	0.922991
Otse	Maunatlala	99	236	906.145	652.122	0	0	0	0.922043	0	3.14677e-06	0.922991
Otse	Metsimotlhabe	99	34	906.145	1277.91	0	0	0	0.922043	0	3.14677e-06	0.922991
Otse	Mmadinare	99	112	906.145	2184.11	0	0	0	0.922043	0	3.14677e-06	0.922991
Otse	Mmandunyane	99	56	906.145	550.59	0	0	0	0.922043	0	3.14677e-06	0.922991
Otse	Mmankgodi	99	166	906.145	1106.41	0	0	0	0.922043	0	3.14677e-06	0.922991
Otse	Mmathethe	99	135	906.145	752.809	0	0	0	0.922043	0	3.14677e-06	0.922991
Otse	Molapowabojang	99	60	906.145	1123.73	0	0	0	0.922043	0	3.14677e-06	0.922991
Otse	Nata	99	59	906.145	655.576	0	0	0	0.922043	0	3.14677e-06	0.922991
Otse	Nkange	99	107	906.145	471.876	0	0	0	0.922043	0	3.14677e-06	0.922991
Otse	Oodi	99	73	906.145	1191.01	0	0	0	0.922043	0	3.14677e-06	0.922991
Otse	Otse	99	99	906.145	906.145	0	0	0	0.922043	0	3.14677e-06	0.922991
Otse	Rakops	99	92	906.145	673.64	0	0	0	0.922043	0	3.14677e-06	0.922991
Otse	Ramokgonami	99	220	906.145	702.828	0	0	0	0.922043	0	3.14677e-06	0.922991
Otse	Ranaka	99	34	906.145	519.152	0	0	0	0.922043	0	3.14677e-06	0.922991
Otse	Sebina	99	51	906.145	374.546	0	0	0	0.922043	0	3.14677e-06	0.922991
Otse	Sefhare	99	24	906.145	721.311	0	0	0	0.922043	0	3.14677e-06	0.922991
Otse	Sefophe	99	121	906.145	924.108	0	0	0	0.922043	0	3.14677e-06	0.922991
Otse	Shakawe	99	313	906.145	1007.32	0	0	0	0.922043	0	3.14677e-06	0.922991
Otse	Shoshong	99	43	906.145	1172.14	0	0	0	0.922043	0	3.14677e-06	0.922991
Otse	Tati_siding	99	277	906.145	1669.34	0	0	0	0.922043	0	3.14677e-06	0.922991
Otse	Tsetsebjwe	99	99	906.145	730.907	0	0	0	0.922043	0	3.14677e-06	0.922991
Rakops	Bokaa	92	73	673.64	763.294	0	0	0	0.922043	0	3.14677e-06	0.922991
Rakops	Digawana	92	28	673.64	594.909	0	0	0	0.922043	0	3.14677e-06	0.922991
Rakops	Gumare	92	260	673.64	1183.25	0	0	0	0.922043	0	3.14677e-06	0.922991
Rakops	Gweta	92	131	673.64	647.618	0	0	0	0.922043	0	3.14677e-06	0.922991
Rakops	Lentsweletau	92	206	673.64	786.59	0	0	0	0.922043	0	3.14677e-06	0.922991
Rakops	Lerala	92	347	673.64	1414.47	0	0	0	0.922043	0	3.14677e-06	0.922991
Rakops	Letlhakeng	92	92	673.64	942.393	0	0	0	0.922043	0	3.14677e-06	0.922991
Rakops	Mathangwane	92	102	673.64	815.916	0	0	0	0.922043	0	3.14677e-06	0.922991
Rakops	Maunatlala	92	236	673.64	652.122	0	0	0	0.922043	0	3.14677e-06	0.922991
Rakops	Metsimotlhabe	92	34	673.64	1277.91	0	0	0	0.922043	0	3.14677e-06	0.922991
Rakops	Mmadinare	92	112	673.64	2184.11	0	0	0	0.922043	0	3.14677e-06	0.922991
Rakops	Mmandunyane	92	56	673.64	550.59	0	0	0	0.922043	0	3.14677e-06	0.922991
Rakops	Mmankgodi	92	166	673.64	1106.41	0	0	0	0.922043	0	3.14677e-06	0.922991
Rakops	Mmathethe	92	135	673.64	752.809	0	0	0	0.922043	0	3.14677e-06	0.922991
Rakops	Molapowabojang	92	60	673.64	1123.73	0	0	0	0.922043	0	3.14677e-06	0.922991
Rakops	Nata	92	59	673.64	655.576	0	0	0	0.922043	0	3.14677e-06	0.922991
Rakops	Nkange	92	107	673.64	471.876	0	0	0	0.922043	0	3.14677e-06	0.922991
Rakops	Oodi	92	73	673.64	1191.01	0	0	0	0.922043	0	3.14677e-06	0.922991
Rakops	Otse	92	99	673.64	906.145	0	0	0	0.922043	0	3.14677e-06	0.922991
Rakops	Ramokgonami	92	220	673.64	702.828	0	0	0	0.922043	0	3.14677e-06	0.922991
Rakops	Ranaka	92	34	673.64	519.152	0	0	0	0.922043	0	3.14677e-06	0.922991
Rakops	Sebina	92	51	673.64	374.546	0	0	0	0.922043	0	3.14677e-06	0.922991
Rakops	Sefhare	92	24	673.64	721.311	0	0	0	0.922043	0	3.14677e-06	0.922991
Rakops	Sefophe	92	121	673.64	924.108	0	0	0	0.922043	0	3.14677e-06	0.922991
Rakops	Shakawe	92	313	673.64	1007.32	0	0	0	0.922043	0	3.14677e-06	0.922991
Rakops	Shoshong	92	43	673.64	1172.14	0	0	0	0.922043	0	3.14677e-06	0.922991
Rakops	Tati_siding	92	277	673.64	1669.34	0	0	0	0.922043	0	3.14677e-06	0.922991
Rakops	Tsetsebjwe	92	99	673.64	730.907	0	0	0	0.922043	0	3.14677e-06	0.922991
Ramokgonami	Bokaa	220	73	702.828	763.294	0	0	0	0.922043	0	3.14677e-06	0.922991
Ramokgonami	Digawana	220	28	702.828	594.909	0	0	0	0.922043	0	3.14677e-06	0.922991
Ramokgonami	Gumare	220	260	702.828	1183.25	0	0	0	0.922043	0	3.14677e-06	0.922991
Ramokgonami	Gweta	220	131	702.828	647.618	0	0	0	0.922043	0	3.14677e-06	0.922991
Ramokgonami	Lentsweletau	220	206	702.828	786.59	0	0	0	0.922043	0	3.14677e-06	0.922991
Ramokgonami	Lerala	220	347	702.828	1414.47	0	0	0	0.922043	0	3.14677e-06	0.922991
Ramokgonami	Letlhakeng	220	92	702.828	942.393	0	0	0	0.922043	0	3.14677e-06	0.922991
Ramokgonami	Masunga	220	182	702.828	930.28	0	0	0	0.922043	0	3.14677e-06	0.922991
Ramokgonami	Mathangwane	220	102	702.828	815.916	0	0	0	0.922043	0	3.14677e-06	0.922991
Ramokgonami	Metsimotlhabe	220	34	702.828	1277.91	0	0	0	0.922043	0	3.14677e-06	0.922991
Ramokgonami	Mmadinare	220	112	702.828	2184.11	0	0	0	0.922043	0	3.14677e-06	0.922991
Ramokgonami	Mmandunyane	220	56	702.828	550.59	0	0	0	0.922043	0	3.14677e-06	0.922991
Ramokgonami	Mmankgodi	220	166	702.828	1106.41	0	0	0	0.922043	0	3.14677e-06	0.922991
Ramokgonami	Mmathethe	220	135	702.828	752.809	0	0	0	0.922043	0	3.14677e-06	0.922991
Ramokgonami	Molapowabojang	220	60	702.828	1123.73	0	0	0	0.922043	0	3.14677e-06	0.922991
Ramokgonami	Nata	220	59	702.828	655.576	0	0	0	0.922043	0	3.14677e-06	0.922991
Ramokgonami	Nkange	220	107	702.828	471.876	0	0	0	0.922043	0	3.14677e-06	0.922991
Ramokgonami	Oodi	220	73	702.828	1191.01	0	0	0	0.922043	0	3.14677e-06	0.922991
Ramokgonami	Otse	220	99	702.828	906.145	0	0	0	0.922043	0	3.14677e-06	0.922991
Ramokgonami	Rakops	220	92	702.828	673.64	0	0	0	0.922043	0	3.14677e-06	0.922991
Ramokgonami	Ranaka	220	34	702.828	519.152	0	0	0	0.922043	0	3.14677e-06	0.922991
Ramokgonami	Sebina	220	51	702.828	374.546	0	0	0	0.922043	0	3.14677e-06	0.922991
Ramokgonami	Sefophe	220	121	702.828	924.108	0	0	0	0.922043	0	3.14677e-06	0.922991
Ramokgonami	Shakawe	220	313	702.828	1007.32	0	0	0	0.922043	0	3.14677e-06	0.922991
Ramokgonami	Shoshong	220	43	702.828	1172.14	0	0	0	0.922043	0	3.14677e-06	0.922991
Ramokgonami	Tsetsebjwe	220	99	702.828	730.907	0	0	0	0.922043	0	3.14677e-06	0.922991
Ranaka	Bokaa	34	73	519.152	763.294	0	0	0	0.922043	0	3.14677e-06	0.922991
Ranaka	Digawana	34	28	519.152	594.909	0	0	0	0.922043	0	3.14677e-06	0.922991
Ranaka	Gumare	34	260	519.152	1183.25	0	0	0	0.922043	0	3.14677e-06	0.922991
Ranaka	Gweta	34	131	519.152	647.618	0	0	0	0.922043	0	3.14677e-06	0.922991
Ranaka	Lentsweletau	34	206	519.152	786.59	0	0	0	0.922043	0	3.14677e-06	0.922991
Ranaka	Lerala	34	347	519.152	1414.47	0	0	0	0.922043	0	3.14677e-06	0.922991
Ranaka	Letlhakeng	34	92	519.152	942.393	0	0	0	0.922043	0	3.14677e-06	0.922991
Ranaka	Masunga	34	182	519.152	930.28	0	0	0	0.922043	0	3.14677e-06	0.922991
Ranaka	Mathangwane	34	102	519.152	815.916	0	0	0	0.922043	0	3.14677e-06	0.922991
Ranaka	Maunatlala	34	236	519.152	652.122	0	0	0	0.922043	0	3.14677e-06	0.922991
Ranaka	Metsimotlhabe	34	34	519.152	1277.91	0	0	0	0.922043	0	3.14677e-06	0.922991
Ranaka	Mmadinare	34	112	519.152	2184.11	0	0	0	0.922043	0	3.14677e-06	0.922991
Ranaka	Mmandunyane	34	56	519.152	550.59	0	0	0	0.922043	0	3.14677e-06	0.922991
Ranaka	Mmankgodi	34	166	519.152	1106.41	0	0	0	0.922043	0	3.14677e-06	0.922991
Ranaka	Mmathethe	34	135	519.152	752.809	0	0	0	0.922043	0	3.14677e-06	0.922991
Ranaka	Molapowabojang	34	60	519.152	1123.73	0	0	0	0.922043	0	3.14677e-06	0.922991
Ranaka	Nata	34	59	519.152	655.576	0	0	0	0.922043	0	3.14677e-06	0.922991
Ranaka	Nkange	34	107	519.152	471.876	0	0	0	0.922043	0	3.14677e-06	0.922991
Ranaka	Oodi	34	73	519.152	1191.01	0	0	0	0.922043	0	3.14677e-06	0.922991
Ranaka	Otse	34	99	519.152	906.145	0	0	0	0.922043	0	3.14677e-06	0.922991
Ranaka	Rakops	34	92	519.152	673.64	0	0	0	0.922043	0	3.14677e-06	0.922991
Ranaka	Ramokgonami	34	220	519.152	702.828	0	0	0	0.922043	0	3.14677e-06	0.922991
Ranaka	Sebina	34	51	519.152	374.546	0	0	0	0.922043	0	3.14677e-06	0.922991
Ranaka	Sefhare	34	24	519.152	721.311	0	0	0	0.922043	0	3.14677e-06	0.922991
Ranaka	Sefophe	34	121	519.152	924.108	0	0	0	0.922043	0	3.14677e-06	0.922991
Ranaka	Shakawe	34	313	519.152	1007.32	0	0	0	0.922043	0	3.14677e-06	0.922991
Ranaka	Shoshong	34	43	519.152	1172.14	0	0	0	0.922043	0	3.14677e-06	0.922991
Ranaka	Tati_siding	34	277	519.152	1669.34	0	0	0	0.922043	0	3.14677e-06	0.922991
Ranaka	Tsetsebjwe	34	99	519.152	730.907	0	0	0	0.922043	0	3.14677e-06	0.922991
Sebina	Bokaa	51	73	374.546	763.294	0	0	0	0.922043	0	3.14677e-06	0.922991
Sebina	Digawana	51	28	374.546	594.909	0	0	0	0.922043	0	3.14677e-06	0.922991
Sebina	Gumare	51	260	374.546	1183.25	0	0	0	0.922043	0	3.14677e-06	0.922991
Sebina	Gweta	51	131	374.546	647.618	0	0	0	0.922043	0	3.14677e-06	0.922991
Sebina	Lentsweletau	51	206	374.546	786.59	0	0	0	0.922043	0	3.14677e-06	0.922991
Sebina	Lerala	51	347	374.546	1414.47	0	0	0	0.922043	0	3.14677e-06	0.922991
Sebina	Letlhakeng	51	92	374.546	942.393	0	0	0	0.922043	0	3.14677e-06	0.922991
Sebina	Masunga	51	182	374.546	930.28	0	0	0	0.922043	0	3.14677e-06	0.922991
Sebina	Mathangwane	51	102	374.546	815.916	0	0	0	0.922043	0	3.14677e-06	0.922991
Sebina	Maunatlala	51	236	374.546	652.122	0	0	0	0.922043	0	3.14677e-06	0.922991
Sebina	Metsimotlhabe	51	34	374.546	1277.91	0	0	0	0.922043	0	3.14677e-06	0.922991
Sebina	Mmadinare	51	112	374.546	2184.11	0	0	0	0.922043	0	3.14677e-06	0.922991
Sebina	Mmandunyane	51	56	374.546	550.59	0	0	0	0.922043	0	3.14677e-06	0.922991
Sebina	Mmankgodi	51	166	374.546	1106.41	0	0	0	0.922043	0	3.14677e-06	0.922991
Sebina	Mmathethe	51	135	374.546	752.809	0	0	0	0.922043	0	3.14677e-06	0.922991
Sebina	Molapowabojang	51	60	374.546	1123.73	0	0	0	0.922043	0	3.14677e-06	0.922991
Sebina	Nata	51	59	374.546	655.576	0	0	0	0.922043	0	3.14677e-06	0.922991
Sebina	Nkange	51	107	374.546	471.876	0	0	0	0.922043	0	3.14677e-06	0.922991
Sebina	Oodi	51	73	374.546	1191.01	0	0	0	0.922043	0	3.14677e-06	0.922991
Sebina	Otse	51	99	374.546	906.145	0	0	0	0.922043	0	3.14677e-06	0.922991
Sebina	Rakops	51	92	374.546	673.64	0	0	0	0.922043	0	3.14677e-06	0.922991
Sebina	Ramokgonami	51	220	374.546	702.828	0	0	0	0.922043	0	3.14677e-06	0.922991
Sebina	Ranaka	51	34	374.546	519.152	0	0	0	0.922043	0	3.14677e-06	0.922991
Sebina	Sebina	51	51	374.546	374.546	0	0	0	0.922043	0	3.14677e-06	0.922991
Sebina	Sefhare	51	24	374.546	721.311	0	0	0	0.922043	0	3.14677e-06	0.922991
Sebina	Sefophe	51	121	374.546	924.108	0	0	0	0.922043	0	3.14677e-06	0.922991
Sebina	Shakawe	51	313	374.546	1007.32	0	0	0	0.922043	0	3.14677e-06	0.922991
Sebina	Shoshong	51	43	374.546	1172.14	0	0	0	0.922043	0	3.14677e-06	0.922991
Sebina	Tati_siding	51	277	374.546	1669.34	0	0	0	0.922043	0	3.14677e-06	0.922991
Sebina	Tsetsebjwe	51	99	374.546	730.907	0	0	0	0.922043	0	3.14677e-06	0.922991
Sefhare	Bokaa	24	73	721.311	763.294	0	0	0	0.922043	0	3.14677e-06	0.922991
Sefhare	Digawana	24	28	721.311	594.909	0	0	0	0.922043	0	3.14677e-06	0.922991
Sefhare	Gumare	24	260	721.311	1183.25	0	0	0	0.922043	0	3.14677e-06	0.922991
Sefhare	Gweta	24	131	721.311	647.618	0	0	0	0.922043	0	3.14677e-06	0.922991
Sefhare	Lentsweletau	24	206	721.311	786.59	0	0	0	0.922043	0	3.14677e-06	0.922991
Sefhare	Letlhakeng	24	92	721.311	942.393	0	0	0	0.922043	0	3.14677e-06	0.922991
Sefhare	Masunga	24	182	721.311	930.28	0	0	0	0.922043	0	3.14677e-06	0.922991
Sefhare	Mathangwane	24	102	721.311	815.916	0	0	0	0.922043	0	3.14677e-06	0.922991
Sefhare	Maunatlala	24	236	721.311	652.122	0	0	0	0.922043	0	3.14677e-06	0.922991
Sefhare	Metsimotlhabe	24	34	721.311	1277.91	0	0	0	0.922043	0	3.14677e-06	0.922991
Sefhare	Mmadinare	24	112	721.311	2184.11	0	0	0	0.922043	0	3.14677e-06	0.922991
Sefhare	Mmandunyane	24	56	721.311	550.59	0	0	0	0.922043	0	3.14677e-06	0.922991
Sefhare	Mmankgodi	24	166	721.311	1106.41	0	0	0	0.922043	0	3.14677e-06	0.922991
Sefhare	Mmathethe	24	135	721.311	752.809	0	0	0	0.922043	0	3.14677e-06	0.922991
Sefhare	Molapowabojang	24	60	721.311	1123.73	0	0	0	0.922043	0	3.14677e-06	0.922991
Sefhare	Nata	24	59	721.311	655.576	0	0	0	0.922043	0	3.14677e-06	0.922991
Sefhare	Nkange	24	107	721.311	471.876	0	0	0	0.922043	0	3.14677e-06	0.922991
Sefhare	Oodi	24	73	721.311	1191.01	0	0	0	0.922043	0	3.14677e-06	0.922991
Sefhare	Otse	24	99	721.311	906.145	0	0	0	0.922043	0	3.14677e-06	0.922991
Sefhare	Rakops	24	92	721.311	673.64	0	0	0	0.922043	0	3.14677e-06	0.922991
Sefhare	Ramokgonami	24	220	721.311	702.828	0	0	0	0.922043	0	3.14677e-06	0.922991
Sefhare	Ranaka	24	34	721.311	519.152	0	0	0	0.922043	0	3.14677e-06	0.922991
Sefhare	Sebina	24	51	721.311	374.546	0	0	0	0.922043	0	3.14677e-06	0.922991
Sefhare	Sefhare	24	24	721.311	721.311	0	0	0	0.922043	0	3.14677e-06	0.922991
Sefhare	Sefophe	24	121	721.311	924.108	0	0	0	0.922043	0	3.14677e-06	0.922991
Sefhare	Shakawe	24	313	721.311	1007.32	0	0	0	0.922043	0	3.14677e-06	0.922991
Sefhare	Shoshong	24	43	721.311	1172.14	0	0	0	0.922043	0	3.14677e-06	0.922991
Sefhare	Tati_siding	24	277	721.311	1669.34	0	0	0	0.922043	0	3.14677e-06	0.922991
Sefhare	Tsetsebjwe	24	99	721.311	730.907	0	0	0	0.922043	0	3.14677e-06	0.922991
Sefophe	Bokaa	121	73	924.108	763.294	0	0	0	0.922043	0	3.14677e-06	0.922991
Sefophe	Digawana	121	28	924.108	594.909	0	0	0	0.922043	0	3.14677e-06	0.922991
Sefophe	Gumare	121	260	924.108	1183.25	0	0	0	0.922043	0	3.14677e-06	0.922991
Sefophe	Gweta	121	131	924.108	647.618	0	0	0	0.922043	0	3.14677e-06	0.922991
Sefophe	Lentsweletau	121	206	924.108	786.59	0	0	0	0.922043	0	3.14677e-06	0.922991
Sefophe	Lerala	121	347	924.108	1414.47	0	0	0	0.922043	0	3.14677e-06	0.922991
Sefophe	Letlhakeng	121	92	924.108	942.393	0	0	0	0.922043	0	3.14677e-06	0.922991
Sefophe	Masunga	121	182	924.108	930.28	0	0	0	0.922043	0	3.14677e-06	0.922991
Sefophe	Mathangwane	121	102	924.108	815.916	0	0	0	0.922043	0	3.14677e-06	0.922991
Sefophe	Maunatlala	121	236	924.108	652.122	0	0	0	0.922043	0	3.14677e-06	0.922991
Sefophe	Metsimotlhabe	121	34	924.108	1277.91	0	0	0	0.922043	0	3.14677e-06	0.922991
Sefophe	Mmadinare	121	112	924.108	2184.11	0	0	0	0.922043	0	3.14677e-06	0.922991
Sefophe	Mmandunyane	121	56	924.108	550.59	0	0	0	0.922043	0	3.14677e-06	0.922991
Sefophe	Mmankgodi	121	166	924.108	1106.41	0	0	0	0.922043	0	3.14677e-06	0.922991
Sefophe	Mmathethe	121	135	924.108	752.809	0	0	0	0.922043	0	3.14677e-06	0.922991
Sefophe	Molapowabojang	121	60	924.108	1123.73	0	0	0	0.922043	0	3.14677e-06	0.922991
Sefophe	Nata	121	59	924.108	655.576	0	0	0	0.922043	0	3.14677e-06	0.922991
Sefophe	Nkange	121	107	924.108	471.876	0	0	0	0.922043	0	3.14677e-06	0.922991
Sefophe	Oodi	121	73	924.108	1191.01	0	0	0	0.922043	0	3.14677e-06	0.922991
Sefophe	Otse	121	99	924.108	906.145	0	0	0	0.922043	0	3.14677e-06	0.922991
Sefophe	Rakops	121	92	924.108	673.64	0	0	0	0.922043	0	3.14677e-06	0.922991
Sefophe	Ramokgonami	121	220	924.108	702.828	0	0	0	0.922043	0	3.14677e-06	0.922991
Sefophe	Ranaka	121	34	924.108	519.152	0	0	0	0.922043	0	3.14677e-06	0.922991
Sefophe	Sebina	121	51	924.108	374.546	0	0	0	0.922043	0	3.14677e-06	0.922991
Sefophe	Sefhare	121	24	924.108	721.311	0	0	0	0.922043	0	3.14677e-06	0.922991
Sefophe	Shakawe	121	313	924.108	1007.32	0	0	0	0.922043	0	3.14677e-06	0.922991
Sefophe	Shoshong	121	43	924.108	1172.14	0	0	0	0.922043	0	3.14677e-06	0.922991
Sefophe	Tsetsebjwe	121	99	924.108	730.907	0	0	0	0.922043	0	3.14677e-06	0.922991
Shakawe	Bokaa	313	73	1007.32	763.294	0	0	0	0.922043	0	3.14677e-06	0.922991
Shakawe	Digawana	313	28	1007.32	594.909	0	0	0	0.922043	0	3.14677e-06	0.922991
Shakawe	Gweta	313	131	1007.32	647.618	0	0	0	0.922043	0	3.14677e-06	0.922991
Shakawe	Lentsweletau	313	206	1007.32	786.59	0	0	0	0.922043	0	3.14677e-06	0.922991
Shakawe	Lerala	313	347	1007.32	1414.47	0	0	0	0.922043	0	3.14677e-06	0.922991
Shakawe	Letlhakeng	313	92	1007.32	942.393	0	0	0	0.922043	0	3.14677e-06	0.922991
Shakawe	Masunga	313	182	1007.32	930.28	0	0	0	0.922043	0	3.14677e-06	0.922991
Shakawe	Mathangwane	313	102	1007.32	815.916	0	0	0	0.922043	0	3.14677e-06	0.922991
Shakawe	Maunatlala	313	236	1007.32	652.122	0	0	0	0.922043	0	3.14677e-06	0.922991
Shakawe	Metsimotlhabe	313	34	1007.32	1277.91	0	0	0	0.922043	0	3.14677e-06	0.922991
Shakawe	Mmadinare	313	112	1007.32	2184.11	0	0	0	0.922043	0	3.14677e-06	0.922991
Shakawe	Mmandunyane	313	56	1007.32	550.59	0	0	0	0.922043	0	3.14677e-06	0.922991
Shakawe	Mmankgodi	313	166	1007.32	1106.41	0	0	0	0.922043	0	3.14677e-06	0.922991
Shakawe	Mmathethe	313	135	1007.32	752.809	0	0	0	0.922043	0	3.14677e-06	0.922991
Shakawe	Molapowabojang	313	60	1007.32	1123.73	0	0	0	0.922043	0	3.14677e-06	0.922991
Shakawe	Nata	313	59	1007.32	655.576	0	0	0	0.922043	0	3.14677e-06	0.922991
Shakawe	Nkange	313	107	1007.32	471.876	0	0	0	0.922043	0	3.14677e-06	0.922991
Shakawe	Oodi	313	73	1007.32	1191.01	0	0	0	0.922043	0	3.14677e-06	0.922991
Shakawe	Otse	313	99	1007.32	906.145	0	0	0	0.922043	0	3.14677e-06	0.922991
Shakawe	Rakops	313	92	1007.32	673.64	0	0	0	0.922043	0	3.14677e-06	0.922991
Shakawe	Ramokgonami	313	220	1007.32	702.828	0	0	0	0.922043	0	3.14677e-06	0.922991
Shakawe	Ranaka	313	34	1007.32	519.152	0	0	0	0.922043	0	3.14677e-06	0.922991
Shakawe	Sebina	313	51	1007.32	374.546	0	0	0	0.922043	0	3.14677e-06	0.922991
Shakawe	Sefhare	313	24	1007.32	721.311	0	0	0	0.922043	0	3.14677e-06	0.922991
Shakawe	Sefophe	313	121	1007.32	924.108	0	0	0	0.922043	0	3.14677e-06	0.922991
Shakawe	Shoshong	313	43	1007.32	1172.14	0	0	0	0.922043	0	3.14677e-06	0.922991
Shakawe	Tsetsebjwe	313	99	1007.32	730.907	0	0	0	0.922043	0	3.14677e-06	0.922991
Shoshong	Bokaa	43	73	1172.14	763.294	0	0	0	0.922043	0	3.14677e-06	0.922991
Shoshong	Digawana	43	28	1172.14	594.909	0	0	0	0.922043	0	3.14677e-06	0.922991
Shoshong	Gumare	43	260	1172.14	1183.25	0	0	0	0.922043	0	3.14677e-06	0.922991
Shoshong	Gweta	43	131	1172.14	647.618	0	0	0	0.922043	0	3.14677e-06	0.922991
Shoshong	Lentsweletau	43	206	1172.14	786.59	0	0	0	0.922043	0	3.14677e-06	0.922991
Shoshong	Lerala	43	347	1172.14	1414.47	0	0	0	0.922043	0	3.14677e-06	0.922991
Shoshong	Letlhakeng	43	92	1172.14	942.393	0	0	0	0.922043	0	3.14677e-06	0.922991
Shoshong	Masunga	43	182	1172.14	930.28	0	0	0	0.922043	0	3.14677e-06	0.922991
Shoshong	Mathangwane	43	102	1172.14	815.916	0	0	0	0.922043	0	3.14677e-06	0.922991
Shoshong	Maunatlala	43	236	1172.14	652.122	0	0	0	0.922043	0	3.14677e-06	0.922991
Shoshong	Metsimotlhabe	43	34	1172.14	1277.91	0	0	0	0.922043	0	3.14677e-06	0.922991
Shoshong	Mmadinare	43	112	1172.14	2184.11	0	0	0	0.922043	0	3.14677e-06	0.922991
Shoshong	Mmandunyane	43	56	1172.14	550.59	0	0	0	0.922043	0	3.14677e-06	0.922991
Shoshong	Mmankgodi	43	166	1172.14	1106.41	0	0	0	0.922043	0	3.14677e-06	0.922991
Shoshong	Mmathethe	43	135	1172.14	752.809	0	0	0	0.922043	0	3.14677e-06	0.922991
Shoshong	Molapowabojang	43	60	1172.14	1123.73	0	0	0	0.922043	0	3.14677e-06	0.922991
Shoshong	Nata	43	59	1172.14	655.576	0	0	0	0.922043	0	3.14677e-06	0.922991
Shoshong	Nkange	43	107	1172.14	471.876	0	0	0	0.922043	0	3.14677e-06	0.922991
Shoshong	Oodi	43	73	1172.14	1191.01	0	0	0	0.922043	0	3.14677e-06	0.922991
Shoshong	Otse	43	99	1172.14	906.145	0	0	0	0.922043	0	3.14677e-06	0.922991
Shoshong	Rakops	43	92	1172.14	673.64	0	0	0	0.922043	0	3.14677e-06	0.922991
Shoshong	Ramokgonami	43	220	1172.14	702.828	0	0	0	0.922043	0	3.14677e-06	0.922991
Shoshong	Ranaka	43	34	1172.14	519.152	0	0	0	0.922043	0	3.14677e-06	0.922991
Shoshong	Sebina	43	51	1172.14	374.546	0	0	0	0.922043	0	3.14677e-06	0.922991
Shoshong	Sefhare	43	24	1172.14	721.311	0	0	0	0.922043	0	3.14677e-06	0.922991
Shoshong	Sefophe	43	121	1172.14	924.108	0	0	0	0.922043	0	3.14677e-06	0.922991
Shoshong	Shakawe	43	313	1172.14	1007.32	0	0	0	0.922043	0	3.14677e-06	0.922991
Shoshong	Shoshong	43	43	1172.14	1172.14	0	0	0	0.922043	0	3.14677e-06	0.922991
Shoshong	Tati_siding	43	277	1172.14	1669.34	0	0	0	0.922043	0	3.14677e-06	0.922991
Shoshong	Tsetsebjwe	43	99	1172.14	730.907	0	0	0	0.922043	0	3.14677e-06	0.922991
Tati_siding	Bokaa	277	73	1669.34	763.294	0	0	0	0.922043	0	3.14677e-06	0.922991
Tati_siding	Digawana	277	28	1669.34	594.909	0	0	0	0.922043	0	3.14677e-06	0.922991
Tati_siding	Gumare	277	260	1669.34	1183.25	0	0	0	0.922043	0	3.14677e-06	0.922991
Tati_siding	Gweta	277	131	1669.34	647.618	0	0	0	0.922043	0	3.14677e-06	0.922991
Tati_siding	Lentsweletau	277	206	1669.34	786.59	0	0	0	0.922043	0	3.14677e-06	0.922991
Tati_siding	Lerala	277	347	1669.34	1414.47	0	0	0	0.922043	0	3.14677e-06	0.922991
Tati_siding	Letlhakeng	277	92	1669.34	942.393	0	0	0	0.922043	0	3.14677e-06	0.922991
Tati_siding	Masunga	277	182	1669.34	930.28	0	0	0	0.922043	0	3.14677e-06	0.922991
Tati_siding	Mathangwane	277	102	1669.34	815.916	0	0	0	0.922043	0	3.14677e-06	0.922991
Tati_siding	Maunatlala	277	236	1669.34	652.122	0	0	0	0.922043	0	3.14677e-06	0.922991
Tati_siding	Metsimotlhabe	277	34	1669.34	1277.91	0	0	0	0.922043	0	3.14677e-06	0.922991
Tati_siding	Mmadinare	277	112	1669.34	2184.11	0	0	0	0.922043	0	3.14677e-06	0.922991
Tati_siding	Mmandunyane	277	56	1669.34	550.59	0	0	0	0.922043	0	3.14677e-06	0.922991
Tati_siding	Mmathethe	277	135	1669.34	752.809	0	0	0	0.922043	0	3.14677e-06	0.922991
Tati_siding	Molapowabojang	277	60	1669.34	1123.73	0	0	0	0.922043	0	3.14677e-06	0.922991
Tati_siding	Nata	277	59	1669.34	655.576	0	0	0	0.922043	0	3.14677e-06	0.922991
Tati_siding	Nkange	277	107	1669.34	471.876	0	0	0	0.922043	0	3.14677e-06	0.922991
Tati_siding	Oodi	277	73	1669.34	1191.01	0	0	0	0.922043	0	3.14677e-06	0.922991
Tati_siding	Otse	277	99	1669.34	906.145	0	0	0	0.922043	0	3.14677e-06	0.922991
Tati_siding	Rakops	277	92	1669.34	673.64	0	0	0	0.922043	0	3.14677e-06	0.922991
Tati_siding	Ramokgonami	277	220	1669.34	702.828	0	0	0	0.922043	0	3.14677e-06	0.922991
Tati_siding	Ranaka	277	34	1669.34	519.152	0	0	0	0.922043	0	3.14677e-06	0.922991
Tati_siding	Sebina	277	51	1669.34	374.546	0	0	0	0.922043	0	3.14677e-06	0.922991
Tati_siding	Sefhare	277	24	1669.34	721.311	0	0	0	0.922043	0	3.14677e-06	0.922991
Tati_siding	Sefophe	277	121	1669.34	924.108	0	0	0	0.922043	0	3.14677e-06	0.922991
Tati_siding	Shakawe	277	313	1669.34	1007.32	0	0	0	0.922043	0	3.14677e-06	0.922991
Tati_siding	Shoshong	277	43	1669.34	1172.14	0	0	0	0.922043	0	3.14677e-06	0.922991
Tati_siding	Tati_siding	277	277	1669.34	1669.34	0	0	0	0.922043	0	3.14677e-06	0.922991
Tati_siding	Tsetsebjwe	277	99	1669.34	730.907	0	0	0	0.922043	0	3.14677e-06	0.922991
Tsetsebjwe	Bokaa	99	73	730.907	763.294	0	0	0	0.922043	0	3.14677e-06	0.922991
Tsetsebjwe	Digawana	99	28	730.907	594.909	0	0	0	0.922043	0	3.14677e-06	0.922991
Tsetsebjwe	Gumare	99	260	730.907	1183.25	0	0	0	0.922043	0	3.14677e-06	0.922991
Tsetsebjwe	Gweta	99	131	730.907	647.618	0	0	0	0.922043	0	3.14677e-06	0.922991
Tsetsebjwe	Lentsweletau	99	206	730.907	786.59	0	0	0	0.922043	0	3.14677e-06	0.922991
Tsetsebjwe	Lerala	99	347	730.907	1414.47	0	0	0	0.922043	0	3.14677e-06	0.922991
Tsetsebjwe	Letlhakeng	99	92	730.907	942.393	0	0	0	0.922043	0	3.14677e-06	0.922991
Tsetsebjwe	Masunga	99	182	730.907	930.28	0	0	0	0.922043	0	3.14677e-06	0.922991
Tsetsebjwe	Mathangwane	99	102	730.907	815.916	0	0	0	0.922043	0	3.14677e-06	0.922991
Tsetsebjwe	Maunatlala	99	236	730.907	652.122	0	0	0	0.922043	0	3.14677e-06	0.922991
Tsetsebjwe	Metsimotlhabe	99	34	730.907	1277.91	0	0	0	0.922043	0	3.14677e-06	0.922991
Tsetsebjwe	Mmadinare	99	112	730.907	2184.11	0	0	0	0.922043	0	3.14677e-06	0.922991
Tsetsebjwe	Mmandunyane	99	56	730.907	550.59	0	0	0	0.922043	0	3.14677e-06	0.922991
Tsetsebjwe	Mmankgodi	99	166	730.907	1106.41	0	0	0	0.922043	0	3.14677e-06	0.922991
Tsetsebjwe	Mmathethe	99	135	730.907	752.809	0	0	0	0.922043	0	3.14677e-06	0.922991
Tsetsebjwe	Molapowabojang	99	60	730.907	1123.73	0	0	0	0.922043	0	3.14677e-06	0.922991
Tsetsebjwe	Nata	99	59	730.907	655.576	0	0	0	0.922043	0	3.14677e-06	0.922991
Tsetsebjwe	Nkange	99	107	730.907	471.876	0	0	0	0.922043	0	3.14677e-06	0.922991
Tsetsebjwe	Oodi	99	73	730.907	1191.01	0	0	0	0.922043	0	3.14677e-06	0.922991
Tsetsebjwe	Otse	99	99	730.907	906.145	0	0	0	0.922043	0	3.14677e-06	0.922991
Tsetsebjwe	Rakops	99	92	730.907	673.64	0	0	0	0.922043	0	3.14677e-06	0.922991
Tsetsebjwe	Ramokgonami	99	220	730.907	702.828	0	0	0	0.922043	0	3.14677e-06	0.922991
Tsetsebjwe	Ranaka	99	34	730.907	519.152	0	0	0	0.922043	0	3.14677e-06	0.922991
Tsetsebjwe	Sebina	99	51	730.907	374.546	0	0	0	0.922043	0	3.14677e-06	0.922991
Tsetsebjwe	Sefhare	99	24	730.907	721.311	0	0	0	0.922043	0	3.14677e-06	0.922991
Tsetsebjwe	Sefophe	99	121	730.907	924.108	0	0	0	0.922043	0	3.14677e-06	0.922991
Tsetsebjwe	Shakawe	99	313	730.907	1007.32	0	0	0	0.922043	0	3.14677e-06	0.922991
Tsetsebjwe	Shoshong	99	43	730.907	1172.14	0	0	0	0.922043	0	3.14677e-06	0.922991
Tsetsebjwe	Tati_siding	99	277	730.907	1669.34	0	0	0	0.922043	0	3.14677e-06	0.922991
Notes:
1. Estimated proportions of HIV-1 transmissions in the trial population were adjusted for differential sampling by among trial communities
2. Simultaneous confidence intervals at the 5% significance level were estimated with the Goodman method as described in the materials and methods

[truncated: 6 more sheets: Supplementary file 1 Table 1J, Supplementary file 1 Table 1K, Supplementary file 1 Table 1L, Supplementary file 1 Table 1M, Supplementary file 1 Table 1N, Supplementary file 1 Table 1O]
