# Supplementary figures and images for: Deep-sequence phylogenetics to quantify patterns of HIV transmission in the context of a universal testing and treatment trial – BCPP/Ya Tsie trial
Source: eLife journal article supplement (doi:10.7554/elife.72657), 2022-02-09

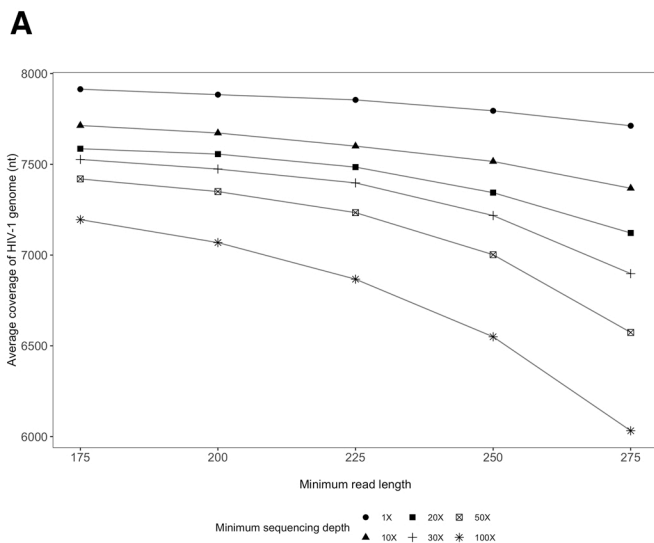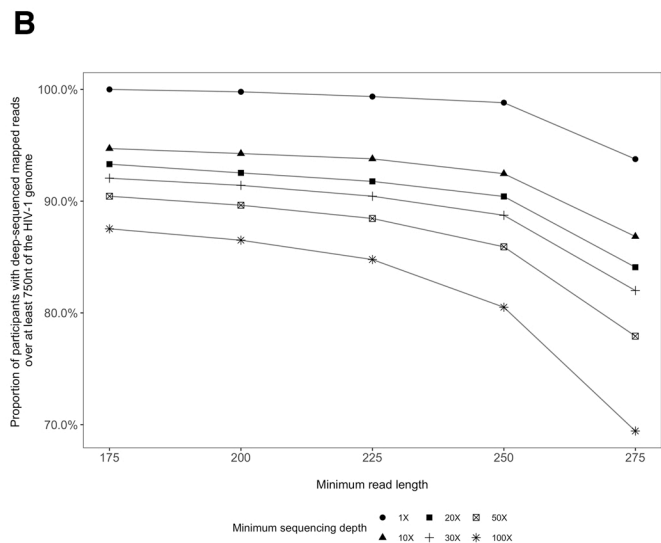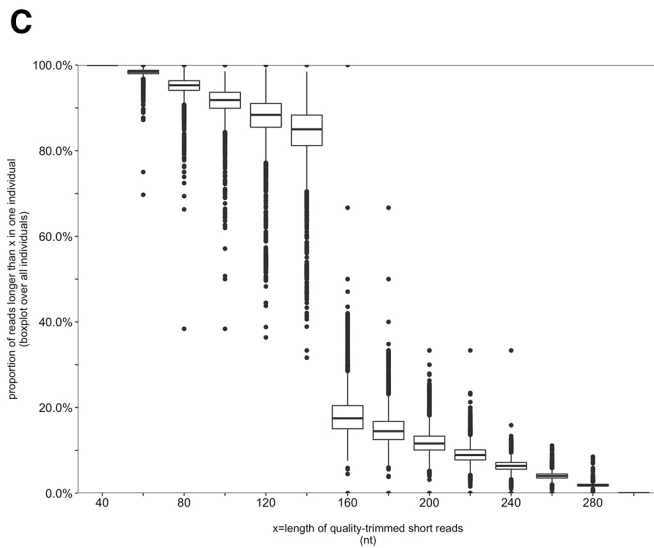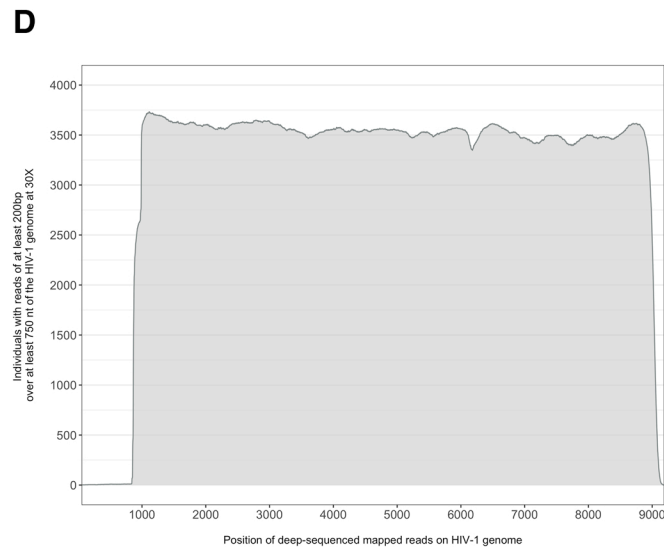

Supplement: supp [file elife_poa_e72657_Figure_1_figure_supplement_1.pdf › elife_poa_e72657_Figure_1_figure_supplement_1.pdf]

**A**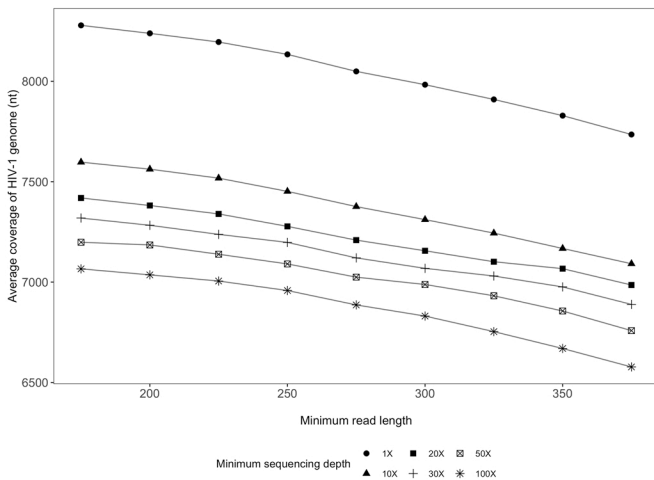**B**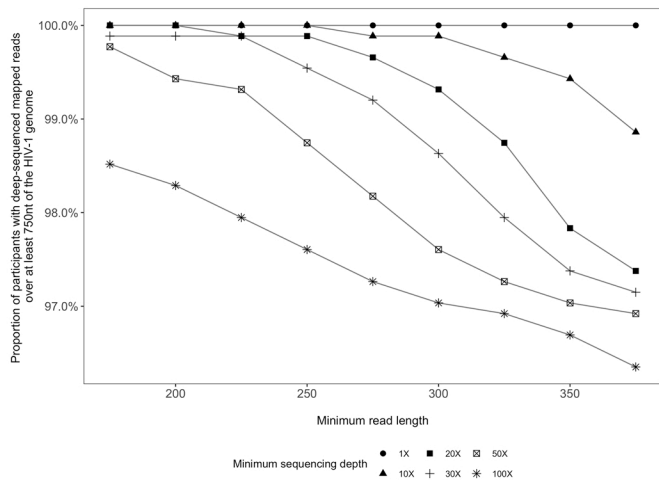**C**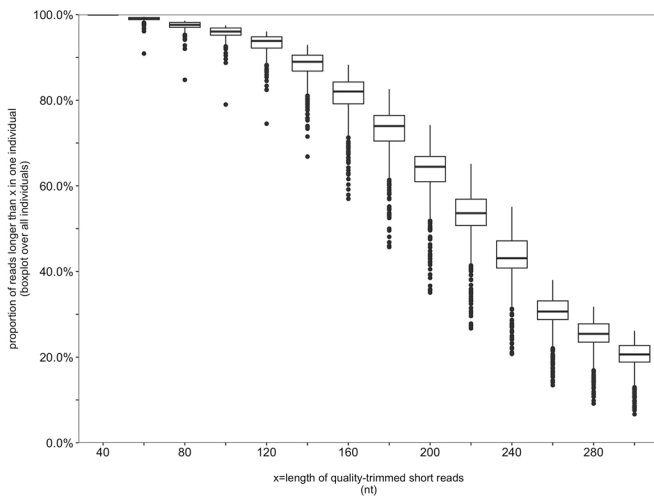**D**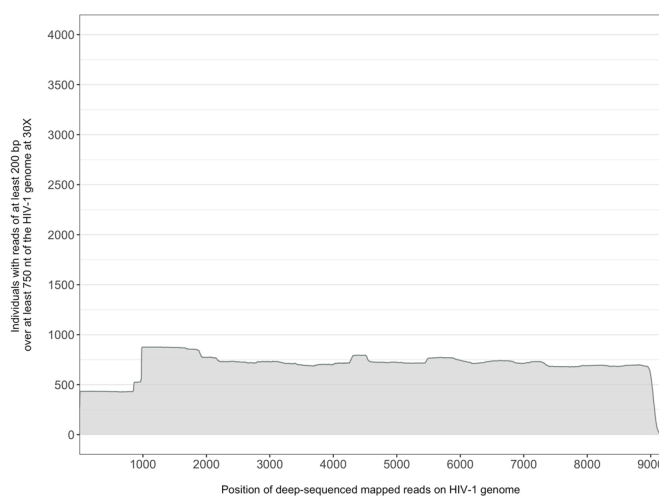

Supplement: supp [file elife_poa_e72657_Figure_1_figure_supplement_2.pdf › elife_poa_e72657_Figure_1_figure_supplement_2.pdf]
